# Supplementary material for: Efficacy of vitamin D3 supplementation on cancer mortality in the general population and the prognosis of patients with cancer: protocol of a systematic review and individual patient data meta-analysis of randomised controlled trials
Source: PubMed Central journal article supplement — BMJ Open. 2021 Jan 13;11(1):e041607. doi: 10.1136/bmjopen-2020-041607 (PMC7812083; doi:10.1136/bmjopen-2020-041607), 2021-01-13
Supplement: bmjopen-2020-041607.draft_revisions.pdf [file bmjopen-2020-041607.draft_revisions.pdf]

# BMJ Open

BMJ Open is committed to open peer review. As part of this commitment we make the peer review history of every article we publish publicly available.

When an article is published we post the peer reviewers' comments and the authors' responses online. We also post the versions of the paper that were used during peer review. These are the versions that the peer review comments apply to.

The versions of the paper that follow are the versions that were submitted during the peer review process. They are not the versions of record or the final published versions. They should not be cited or distributed as the published version of this manuscript.

BMJ Open is an open access journal and the full, final, typeset and author-corrected version of record of the manuscript is available on our site with no access controls, subscription charges or pay-per-view fees (<http://bmjopen.bmj.com>).

If you have any questions on BMJ Open's open peer review process please email [info.bmjopen@bmj.com](mailto:info.bmjopen@bmj.com)

# BMJ Open

## **Efficacy of Vitamin D3 supplementation on cancer mortality in the general population and the prognosis of cancer patients: Protocol of a systematic review and individual patient data meta-analysis of randomized controlled trials**

|                               |                                                                                                                                                                                                                                                                                                                                                                                                                                           |
|-------------------------------|-------------------------------------------------------------------------------------------------------------------------------------------------------------------------------------------------------------------------------------------------------------------------------------------------------------------------------------------------------------------------------------------------------------------------------------------|
| Journal:                      | <i>BMJ Open</i>                                                                                                                                                                                                                                                                                                                                                                                                                           |
| Manuscript ID                 | bmjopen-2020-041607                                                                                                                                                                                                                                                                                                                                                                                                                       |
| Article Type:                 | Protocol                                                                                                                                                                                                                                                                                                                                                                                                                                  |
| Date Submitted by the Author: | 12-Jun-2020                                                                                                                                                                                                                                                                                                                                                                                                                               |
| Complete List of Authors:     | Schöttker, Ben; German Cancer Research Centre, Division of Clinical Epidemiology and Aging Research; University of Heidelberg, Network Aging Research<br>Kuznia, Sabine; German Cancer Research Centre, Division of Clinical Epidemiology and Aging Research<br>Brenner, Hermann; German Cancer Research Centre, Division of Clinical Epidemiology and Aging Research; National Center of Tumor Diseases, Division of Preventive Oncology |
| Keywords:                     | Nutritional support < ONCOLOGY, ONCOLOGY, NUTRITION & DIETETICS, PUBLIC HEALTH, Protocols & guidelines < HEALTH SERVICES ADMINISTRATION & MANAGEMENT, Epidemiology < ONCOLOGY                                                                                                                                                                                                                                                             |
|                               |                                                                                                                                                                                                                                                                                                                                                                                                                                           |

SCHOLARONE™  
Manuscripts

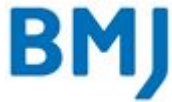

I, the Submitting Author has the right to grant and does grant on behalf of all authors of the Work (as defined in the below author licence), an exclusive licence and/or a non-exclusive licence for contributions from authors who are: i) UK Crown employees; ii) where BMJ has agreed a CC-BY licence shall apply, and/or iii) in accordance with the terms applicable for US Federal Government officers or employees acting as part of their official duties; on a worldwide, perpetual, irrevocable, royalty-free basis to BMJ Publishing Group Ltd ("BMJ") its licensees and where the relevant Journal is co-owned by BMJ to the co-owners of the Journal, to publish the Work in this journal and any other BMJ products and to exploit all rights, as set out in our [licence](#).

The Submitting Author accepts and understands that any supply made under these terms is made by BMJ to the Submitting Author unless you are acting as an employee on behalf of your employer or a postgraduate student of an affiliated institution which is paying any applicable article publishing charge ("APC") for Open Access articles. Where the Submitting Author wishes to make the Work available on an Open Access basis (and intends to pay the relevant APC), the terms of reuse of such Open Access shall be governed by a Creative Commons licence – details of these licences and which [Creative Commons](#) licence will apply to this Work are set out in our licence referred to above.

Other than as permitted in any relevant BMJ Author's Self Archiving Policies, I confirm this Work has not been accepted for publication elsewhere, is not being considered for publication elsewhere and does not duplicate material already published. I confirm all authors consent to publication of this Work and authorise the granting of this licence.

1  
2  
3 1 **Efficacy of Vitamin D<sub>3</sub> supplementation on cancer mortality in the**  
4  
5 2 **general population and the prognosis of cancer patients: Protocol of a**  
6  
7 3 **systematic review and individual patient data meta-analysis of**  
8  
9 4 **randomized controlled trials**

10  
11 5  
12 6 Ben Schöttker<sup>1,2\*</sup>, Sabine Kuznia<sup>1\*</sup>, Hermann Brenner<sup>1-4</sup>

13 7  
14  
15 8 <sup>1</sup> Division of Clinical Epidemiology and Aging Research, German Cancer Research Center (DKFZ),  
16 9 Im Neuenheimer Feld 581, 69120 Heidelberg, Germany

17  
18 10 <sup>2</sup> Network Aging Research (NAR), University of Heidelberg, Bergheimer Straße 20, 69115  
19 11 Heidelberg, Germany

20  
21 12 <sup>3</sup> Division of Preventive Oncology, German Cancer Research Center (DKFZ) and National Center  
22 13 for Tumor Diseases (NCT), Im Neuenheimer Feld 460, 69120 Heidelberg, Germany

23  
24 14 <sup>4</sup> German Cancer Consortium (DKTK), German Cancer Research Center (DKFZ), Im Neuenheimer  
25 15 Feld 280, 69120 Heidelberg, Germany

26 16  
27  
28 17  
29  
30 18  
31 19 \* Ben Schöttker and Sabine Kuznia share the first authorship and contributed equally to the  
32 20 preparation of the manuscript.

33  
34  
35 21  
36 22 **Corresponding author:**

37 23 Ben Schöttker,  
38 24 Division of Clinical Epidemiology and Aging Research,  
39 25 German Cancer Research Center (DKFZ),  
40 26 Im Neuenheimer Feld 581,  
41 27 69120 Heidelberg, Germany,  
42 28 Phone: +49 6221 42 1355,  
43 29 E-Mail: b.schoettker@dkfz.de  
44  
45  
46  
47  
48  
49

50 30  
51  
52 31 **E-Mails:**

53 32 Ben Schöttker - b.schoettker@dkfz.de  
54 33 Sabine Kuznia – s.kuznia@dkfz.de  
55 34 Hermann Brenner - h.brenner@dkfz.de  
56  
57  
58  
59

60 35  
36 Word Count (excluding title page, abstract, references, figures, and tables): 4,698

1  
2  
3  
4  
5  
6  
7  
8  
9  
10  
11  
12  
13  
14  
15  
16  
17  
18  
19  
20  
21  
22  
23  
24  
25  
26  
27  
28  
29  
30  
31  
32  
33  
34  
35  
36  
37  
38  
39  
40  
41  
42  
43  
44  
45  
46  
47  
48  
49  
50  
51  
52  
53  
54  
55  
56  
57  
58  
59  
60

## 37 **ABSTRACT**

### 38 **Introduction**

39 Vitamin D insufficiency is much more common among cancer patients than the general population.  
40 Previous meta-analyses of controlled trials showed an approx. 15% reduction of cancer mortality  
41 by vitamin D supplementation compared to placebo or no treatment in the general population.

42 On top of updating the latest systematic review on vitamin D supplementation and cancer mortality  
43 in the general population, we aim to conduct the first meta-analyses of trials on vitamin D<sub>3</sub>  
44 supplementation and cancer-specific and overall survival of cancer patients. In addition, none of the  
45 previous systematic reviews collected individual patient data. We will do this for the first time to be  
46 able to conduct subgroup analyses.

### 47 **Methods and analysis**

48 A systematic review and individual patient data meta-analysis will be performed on randomized  
49 placebo-controlled trials with a vitamin D<sub>3</sub> intervention. The addressed outcomes are cancer mortality  
50 in the general population as well as cancer-specific and overall survival of cancer patients. The  
51 quality appraisal of the studies will be evaluated by the Cochrane Collaboration's tool for assessing  
52 risk of bias. Trial results will be re-analyzed using adjusted and unadjusted Cox proportional hazard  
53 regression models and meta-analyses are planned. Cochran's Q-Test and the I<sup>2</sup> index will be used  
54 to statistically assess the level of heterogeneity, while sensitivity and subgroup analyses serve to  
55 identify potential causes of heterogeneity. Subgroup analyses will be conducted for vitamin D<sub>3</sub>  
56 dosing, follow-up time, co-supplementation of calcium, age, sex, obesity, vitamin D  
57 deficiency/insufficiency, history of cancer, and compliance. Publication bias will be assessed by  
58 funnel plots and Egger's test.

## 59 **Ethics and dissemination**

60 Ethical approval is not required since no human beings are involved in this systematic review.

61 Results will be published in a peer-reviewed journal with open access. They will be presented at  
62 conferences and sent to patient advocacy groups and German oncologic rehabilitation centers.

## 63 **Trial registration number**

64 In accordance with the guidelines, our systematic review protocol was submitted to the International  
65 Prospective Register of Systematic Reviews (PROSPERO) on May 15<sup>th</sup>, 2020 [registration ID  
66 185566].

## 67 **Keywords**

68 Vitamin D, cancer, mortality, systematic review, meta-analysis

## 70 **Strengths and limitations of this study**

- 71 • First meta-analysis on vitamin D<sub>3</sub> supplementation and cancer survival as well as first individual  
72 patient data meta-analysis on this research topic.
- 73 • Thorough assessment of study quality and sources of heterogeneity and bias in meta-analyses.
- 74 • Conduction of the systematic review according to this protocol minimizes the risk of bias and will  
75 gather reproducible results.
- 76 • Number of studies with eligible data for subgroup analyses may be limited.

## 77 INTRODUCTION

### 78 Background

79 The global cancer burden is estimated to have risen to 18.1 million new cases and 9.6 million deaths  
80 in 2018.(1) There is accumulating evidence from epidemiological studies that a low vitamin D status  
81 goes along with increased risks of several types of cancer. Meta-analyses of observational studies  
82 reported increased risks of lung cancer, colorectal cancer, breast cancer, bladder carcinoma, and  
83 lymphoma in subjects with low 25(OH)D serum concentrations.(2-5) Furthermore, epidemiological  
84 studies have shown that low serum levels of 25-hydroxyvitamin D (25(OH)D), the acknowledged  
85 best biomarker to measure vitamin D status, were strongly associated with substantially increased  
86 cancer mortality.(6) For example, in a German population-based cohort study of older adults, the  
87 risk to die of cancer was increased by 42% in study participants with vitamin D deficiency (defined  
88 as 25(OH)D < 30 nmol/L) compared to individuals with sufficient 25(OH)D levels > 50 nmol/L (hazard  
89 ratio [HR] and 95% confidence interval (95%CI): 1.42 [1.08; 1.87]).(7)

90 The molecular links between vitamin D and carcinogenesis and progression have been described in  
91 detail by Moukayed and Grant.(8) In brief, genomic mechanisms of the active hormone 1,25(OH)<sub>2</sub>D  
92 impact signaling pathways that regulate cell proliferation, differentiation, and cell survival.  
93 1,25(OH)<sub>2</sub>D may primarily act as an anti-proliferative agent in many tissues and may slow down  
94 malignant cellular growth. Thus, there is biological plausibility that a sufficient vitamin D supply is  
95 especially essential for good cancer prognosis. A causal relationship of low 25(OH)D levels and  
96 cancer mortality was furthermore supported by a Mendelian randomization study conducted within  
97 three large cohorts from Denmark.(9)

98 Several randomized trials with vitamin D supplementation have been conducted with mostly the aim  
99 to improve skeletal outcomes at older ages. Cancer mortality was a secondary outcome in all trials  
100 and therefore the trials were not specifically designed for this outcome.(10) Despite strong  
101 heterogeneity in study populations, intervention schemes, and other important design aspects, three  
102 out of four meta-analyses demonstrated a statistically significant reduction in cancer mortality.(11-  
103 14)

1  
2 104 However, most trials have not been restricted to patients that were vitamin D deficient.(10) The latter  
3  
4 105 is important because the association of 25(OH)D levels and adverse health outcomes is not linear.(6)  
5  
6 106 Neglecting this dose-response relationship by treating subjects with optimal 25(OH)D levels is  
7  
8 107 expected to have led to a substantial underestimation of the potential efficacy of vitamin D  
9  
10 108 supplementation in previous clinical trials.(15) Therefore, there is a need for a systematic review that  
11  
12 109 re-analyses individual patient data (IPD) from previous trials restricted to subjects with vitamin D  
13  
14 110 insufficiency (25(OH)D < 50 nmol/L) or deficiency (25(OH)D < 30 nmol/L).  
15  
16

17  
18 111 Another important reason to re-analyze the previous trial data is that most studies were not restricted  
19  
20 112 to cancer patients. Vitamin D deficiency or insufficiency are much more common among cancer  
21  
22 113 patients than among the general population. In a study with 2,912 colorectal cancer patients, vitamin  
23  
24 114 D deficiency (25(OH)D levels < 30 nmol/L) was found among 59% of colorectal cancer patients  
25  
26 115 during or shortly after first-line treatment, and, in agreement with previous evidence, low 25(OH)D  
27  
28 116 levels were strongly associated with poorer survival.(16, 17) Systematic reviews of observational  
29  
30 117 studies on 25(OH)D levels and cancer prognosis concluded that sufficient 25(OH)D levels are  
31  
32 118 associated with a better prognosis of breast and colorectal cancer, whereas there are too few studies  
33  
34 119 for other cancer sites up to date to draw conclusions.(16, 18)  
35  
36

37  
38 120 Further important potential effect modifiers of vitamin D effects on cancer survival that deserve close  
39  
40 121 investigation are obesity and compliance. People with low compliance and/or obesity (who may need  
41  
42 122 higher vitamin D doses because vitamin D is being stored in adipocytes) might have led to an  
43  
44 123 attenuation of the overall treatment effect in the trials.(19)  
45  
46

## 50 125 **Objective**

51  
52  
53 126 The objective of our systematic review is to assess the efficacy of vitamin D<sub>3</sub> supplementation on  
54  
55 127 cancer mortality in the general population and the prognosis of cancer patients with special attention  
56  
57 128 to potential effect modifiers, including baseline 25(OH)D levels, cancer at baseline, BMI and  
58  
59 129 compliance.  
60



1  
2 130 The main outcomes include “cancer mortality in the general population”, “cancer-specific survival of  
3  
4 131 cancer patients” and “overall survival of cancer patients”. These outcomes are universally used in  
5  
6 132 cancer studies and do not need further refinement during the review.  
7  
8

9 133 In a first step, we intend to update the previous systematic reviews on vitamin D supplementation  
10  
11 134 and cancer mortality in the general population by including newly published trials and unpublished  
12  
13 135 data from trials with outcome data on cancer incidence or all-cause mortality by asking the authors  
14  
15 136 for data on cancer mortality. Second, we will obtain data for an IPD meta-analysis. Third, we will  
16  
17  
18 137 conduct IPD meta-analyses on vitamin D<sub>3</sub> supplementation and overall and cancer-specific survival  
19  
20 138 among cancer patients. Forth, we will conduct subgroup analyses to explore sources of  
21  
22 139 heterogeneity and to identify effect modifiers. The timetable for the review is shown in Table 1.  
23  
24

25 140 **Table 1:** Proposed timetable for conducting the review  
26

| Step                                                  | Timeframe for completion |
|-------------------------------------------------------|--------------------------|
| Literature search, abstract and full-text selection   | 2.5 months               |
| Data extraction & individual patient data acquisition | 2.5 months               |
| Quality appraisal                                     | 2 months                 |
| Data analysis & meta-analysis                         | 3 months                 |
| Writing of manuscript                                 | 2 months                 |
| <b>Total</b>                                          | <b>12 months</b>         |

39 141  
40  
41

## 42 142 **METHODS AND ANALYSIS**

### 43 44 45 143 **Study selection criteria/ Eligibility criteria**

46  
47  
48  
49 144 We will follow a two-step approach for the study selection: First, all trials will be selected that could  
50  
51 145 have potentially published or unpublished data on the research topic. All authors of trials with  
52  
53 146 potentially unpublished data on cancer mortality/survival will be contacted to provide data. In the  
54  
55 147 second step, trials without eligible data for a meta-analysis will be excluded.  
56  
57  
58  
59  
60

1  
2 148 Step 1: Inclusion criteria for trials

3  
4  
5 149 Participants: We will include studies investigating the general adult population (18 years or older)  
6  
7 150 but exclude those limited to particular diseases or conditions (e.g. studies that recruited only patients  
8  
9 151 with type 2 diabetes). However, we will also include studies conducted with cancer populations (18  
10  
11 152 years or older). Apart from the exclusion of non-melanoma skin cancers and benign tumors (where  
12  
13 153 information is available), no restrictions will be made regarding cancer stage or tumor site, as the  
14  
15 154 anti-proliferative effects of vitamin D<sub>3</sub> are not assumed to be specific for cancer site or stage.  
16  
17  
18 155 Therefore, we expect our results to be largely generalizable to the general population and cancer  
19  
20 156 patients, respectively.

21  
22  
23 157 Interventions: We will focus on trials that used vitamin D<sub>3</sub> in any dose and any regimen (e.g.  
24  
25 158 daily/weekly/monthly intake) as the intervention. However, the minimum time of the intervention shall  
26  
27 159 be six months to exclude studies with one-time bolus interventions or very short intervention periods.  
28  
29 160 The first reason is that cancer mortality is highly unlikely to be influenced by very brief intervention  
30  
31 161 periods. The second reason is that after initiating daily, weekly, or monthly supplementation  
32  
33 162 schedules, it takes three to six months for 25(OH)D levels to reach homeostasis.

34  
35  
36 163 Besides, we will also include studies using vitamin D<sub>3</sub> bioequivalent substances such as alfacalcidol,  
37  
38 164 calcifediol, and calcitriol, as all of them are metabolized equally to the active vitamin D hormone  
39  
40  
41 165 1,25(OH)<sub>2</sub>D.

42  
43  
44 166 We will exclude studies with vitamin D<sub>2</sub> supplementation since the Cochrane review of Bjelakovic et  
45  
46 167 al. showed clearly no efficacy on mortality.<sup>(11)</sup> Co-supplementation with calcium or other dietary  
47  
48 168 supplements in the intervention arm will not be an exclusion criterion. A sensitivity analysis will  
49  
50 169 elucidate whether the inclusion of these studies had an impact on the overall effect estimate of the  
51  
52 170 meta-analysis.

53  
54  
55 171 Comparators: We will include only studies, which used placebo as the comparator.

56  
57  
58 172 Outcomes: To be eligible for inclusion in a meta-analysis trials need to have assessed the outcome  
59  
60 173 cancer mortality, cancer survival, or cancer-specific survival. In an intermediate step of the

1  
 2 174 systematic review, we will also record studies with the outcomes cancer incidence or all-cause  
 3  
 4 175 mortality and will contact the authors if they have data for the outcomes needed for the planned  
 5  
 6 176 meta-analyses. The definitions of all outcomes are shown in Table 2.  
 7  
 8

9 177 **Table 2:** Definition of outcomes  
 10

| Outcome                  | Definition                                                                                                                                  |
|--------------------------|---------------------------------------------------------------------------------------------------------------------------------------------|
| All-cause mortality      | Rate of deaths during a specific time period in population at risk                                                                          |
| Cancer mortality         | Rate of cancer deaths during a specific time period in population at risk                                                                   |
| Cancer incidence         | Rate of newly diagnosed cancer cases during a specific time period in population at risk                                                    |
| Overall cancer survival  | Proportion of patients from a cancer population at risk alive at some point subsequent to the diagnosis of their cancer                     |
| Cancer-specific survival | Proportion of patients from a cancer population at risk who did not die of cancer at some point subsequent to the diagnosis of their cancer |

25 178  
 26  
 27  
 28 179 Study design: We will include RCTs in which, analogous to the intervention period, the follow-up  
 29  
 30 180 period is at least six months. The follow-up time should not be longer than the time under treatment.  
 31  
 32 181 We will focus on parallel-group designs and exclude single-arm studies. We will further exclude all  
 33  
 34 182 types of cohort studies and case-control studies as well as the following types of records: reviews,  
 35  
 36 183 dissertations, theses, editorials, study protocol, clinical guidelines, commentaries, and letters.  
 37  
 38

39  
 40 184 Setting: There will be no restrictions by type of setting.  
 41

42  
 43 185 Minimum sample size: The studies need to have at least one cancer death in the verum and placebo  
 44  
 45 186 group.  
 46

47  
 48 187 Geographical location: No restrictions are defined regarding the geographical location.  
 49

50  
 51 188 Step 2: Exclusion criteria for pooling in meta-analysis:  
 52

53  
 54 189 Studies will be excluded for pooling in the meta-analysis, if  
 55

- 56 190 - A risk ratio and 95% confidence interval for at least one outcome of interest (cancer mortality in  
 57  
 58 191 the general population, cancer-specific survival of cancer patients or overall survival of cancer  
 59  
 60

1  
2 192 patients) were not reported in publication and could not be obtained from authors or individual  
3  
4 193 participant data  
5  
6 194 - The trial is already included in the meta-analysis (in case of double publication from the same  
7  
8 195 trial only the publication with the largest amount of information, e.g. the longest follow-up is  
9  
10 196 included)

12 197

## 15 198 **Information sources and search strategy**

17  
18  
19 199 The search strategy will be elaborated by SK, BS, and A Heppert. Mrs. Heppert is a specialist for  
20  
21 200 systematic bibliographic searches at the Central Library of the German Cancer Research Center  
22  
23 201 and is not otherwise associated with the project. Finally, it will be peer-reviewed by HB and carried  
24  
25 202 out by SK.

26  
27  
28 203 The bibliographic databases MEDLINE (Pubmed interface), ISI Web of Science (WoS; Clarivate  
29  
30 204 Analytics interface), and the Cochrane Central Register of Controlled Trials (CENTRAL; OVID  
31  
32 205 interface) will be searched systematically. In addition, we will also carry out a systematic search for  
33  
34 206 previous systematic reviews in the Cochrane Database of Systematic Reviews (CDRS, OVID  
35  
36 207 interface) and KRS Evidence (<https://ksevidence.com>), which are both specialized search engines  
37  
38 208 for systematic reviews. RCTs included in meta-analyses on the topics vitamin D supplementation  
39  
40 209 and cancer mortality, cancer incidence, all-cause mortality, or cancer survival will be extracted and  
41  
42 210 merged with the hits found in the bibliographic database search. The electronic database search will  
43  
44 211 be complemented by searching the WHO's International Clinical Trials Research Portal (ICTRP) to  
45  
46 212 capture results from ongoing or recently completed RCTs that have not been published in scientific  
47  
48 213 journals, yet. We will also scan the reference lists of eligible studies to yield additional trial articles  
49  
50 214 via cross-referencing. A draft of the search strategy is presented in Figure 1.

51  
52  
53  
54 215 We will search in MEDLINE, ISI WoS, and CENTRAL for medical subject headings (MeSH), free text  
55  
56 216 words, synonyms, and related search terms for the concepts "vitamin D", "mortality", "cancer",  
57  
58 217 "randomized controlled trial" and "placebo". Besides, standard search terms for RCTs will be used  
59  
60 218 additionally wherever available. No restrictions are planned in the search strategy to prevent

1  
2 219 overlooking important studies that have not been correctly classified in the respective bibliographic  
3  
4 220 databases. All databases will be searched from inception dates. Moreover, we will not limit the  
5  
6 221 search to studies in English as relevant studies might also be published in other languages. The  
7  
8 222 search string for MEDLINE is shown in Table 3.

11 223 **Table 3:** Search string for MEDLINE

| Step | Search string                                                                                                                                                                                                                                                                                                                                                                                                                                             |
|------|-----------------------------------------------------------------------------------------------------------------------------------------------------------------------------------------------------------------------------------------------------------------------------------------------------------------------------------------------------------------------------------------------------------------------------------------------------------|
| 1    | "vitamin d"[tw] OR "vitamin D"[MeSH] OR cholecalciferol[MeSH] OR cholecalciferol*[tw] OR calciol[tw] OR hydroxycholecalciferols[MeSH] OR hydroxycholecalciferol*[tw] OR dihydroxycholecalciferol*[tw] OR "vitamin d3"[tw] OR "vitamin d 3"[tw] OR calcitriol[MeSH] OR calcitriol[tw] OR "1-hydroxycholecalciferol"[tw] OR calcifediol[MeSH] OR calcifediol[tw] OR calciol[tw] OR alfalcidol[Supplementary Concept] OR alphacalcidol[tw] OR alfalcidol[tw] |
| 2    | mortality[tw] OR mortality[MeSH] OR death[MeSH] OR death[tw] OR survival[tw] OR survival[MeSH]                                                                                                                                                                                                                                                                                                                                                            |
| 3    | neoplasms[MeSH] OR neoplas*[tw] OR malignanc*[tw] OR cancer*[tw] OR tumor*[tw] OR tumour*[tw] OR carcinoma*[tw]                                                                                                                                                                                                                                                                                                                                           |
| 4    | (((((("randomized controlled trial"[pt]) OR "controlled clinical trial"[pt]) OR randomized[tiab]) OR placebo[tiab]) OR "drug therapy"[sh]) OR randomly[tiab]) OR trial[tiab]) OR groups[tiab])) NOT ((animals[mh] NOT humans[mh]))                                                                                                                                                                                                                        |
| 5    | placebos[MeSH] OR placebo[tw]                                                                                                                                                                                                                                                                                                                                                                                                                             |
| 6    | 2 OR 3                                                                                                                                                                                                                                                                                                                                                                                                                                                    |
| 7    | 1 AND 4 AND 5 AND 6                                                                                                                                                                                                                                                                                                                                                                                                                                       |

34 224  
35  
36  
37 225 To search for systematic reviews in CDSR and KRS Evidence, a shortened version of the MEDLINE  
38  
39 226 search string will be used. Only the first three search steps are needed because the study design is  
40  
41  
42 227 "systematic review" and not "placebo-controlled RCT". The search string for CDSR is shown in Table  
43  
44 228 4. The literature search will be updated during the peer-review process of the publication in order to  
45  
46 229 include the most up to date literature.

47  
48  
49  
50  
51  
52  
53  
54  
55  
56  
57  
58  
59  
60

**Table 4:** Search string for the Cochrane Database of Systematic Reviews

| Step | Search string                                                                                                                                                                                                                                                                                                                                                                                                                                                                                                                                                                                                                                                                                                                                                            |
|------|--------------------------------------------------------------------------------------------------------------------------------------------------------------------------------------------------------------------------------------------------------------------------------------------------------------------------------------------------------------------------------------------------------------------------------------------------------------------------------------------------------------------------------------------------------------------------------------------------------------------------------------------------------------------------------------------------------------------------------------------------------------------------|
| 1    | #1 MeSH descriptor: [Vitamin D] explode all trees<br>#2 MeSH descriptor: [Cholecalciferol] explode all trees<br>#3 MeSH descriptor: [Calcifediol] explode all trees<br>#4 MeSH descriptor: [Calcitriol] explode all trees<br>#5 MeSH descriptor: [Hydroxycholecalciferols] explode all trees<br>#6 ("alfacalcidol") OR ("alphacalcidol") OR ("hydroxycholecalciferol*") OR ("1- hydroxycholecalciferol") OR ("hydroxyvitamin* D") OR ("calcifediol") OR ("calcidiol") OR ("calcitriol") OR ("dihydroxycholecalciferol*") OR ("dihydroxyvitamin d*") OR ("vitamin D") OR (cholecalciferol*) OR ("vitamin D3") OR ("vitamin D 3") OR ("calciol")) (Word variations have been searched)<br>#7 ("vitamin d*"):ti,ab,kw (Word variations have been searched)<br>#8 {OR #1-#7} |
| 2    | #9 MeSH descriptor: [Mortality] explode all trees<br>#10 MeSH descriptor: [Death] explode all trees<br>#11 MeSH descriptor: [Survival] explode all trees<br>#12 ("mortality" OR "death" OR "survival") (Word variations have been searched)<br>#13 {OR #9-#12}                                                                                                                                                                                                                                                                                                                                                                                                                                                                                                           |
| 3    | #14 MeSH descriptor: [Neoplasms] explode all trees<br>#15 (carcinoma* OR tumour* OR tumor* OR cancer* OR malignanc* OR neoplas*) (Word variations have been searched)<br>#16 #14 OR #15                                                                                                                                                                                                                                                                                                                                                                                                                                                                                                                                                                                  |
| 4    | #17 #13 OR #16                                                                                                                                                                                                                                                                                                                                                                                                                                                                                                                                                                                                                                                                                                                                                           |
| 5    | #18 #8 AND #17 in Cochrane Reviews (Word variations have been searched)                                                                                                                                                                                                                                                                                                                                                                                                                                                                                                                                                                                                                                                                                                  |

## Data collection and management

Study selection and data extraction will be performed in duplicate by two reviewers. Both are blinded to each other's decision but not to journal titles, study authors, or institutions. The screening will be conducted by entering data into blank Microsoft Word or Excel spreadsheets. The software EndNote will be used to store, organize, and manage all the references and allow a transparent and reproducible systematic search. To assure validity and high quality of the data, the data extraction will be performed by using standard and predefined data extraction forms. Both reviewers will scan independently the titles and abstracts of studies obtained by the aforementioned search strategy against the eligibility criteria. For those studies that meet the inclusion criteria or that cannot yet be fully excluded, full-text reports will be acquired and screened again towards the inclusion criteria. In

1  
2 243 the next step, the results of both reviewers will be compared and in cases of disagreement, critical  
3  
4 244 points will be discussed until a consensus is reached. If necessary, we will contact study authors to  
5  
6 245 resolve questions about eligibility. We will document the reasons for excluding trials.  
7  
8

9 246 After completing the abstract and full-text selection with eligible studies, the two reviewers will extract  
10  
11 247 independently the pre-defined data. Extracted items will include first author, publication year,  
12  
13 248 country, number of participants, general population or medical condition (including cancer site and  
14  
15 249 stage(s)), sex, mean/median age, race/ethnicity/skin color, mean/median BMI, mean/median  
16  
17 250 25(OH)D levels at baseline, vitamin D<sub>3</sub> dosing regimen, duration of vitamin D<sub>3</sub> supplementation,  
18  
19  
20 251 compliance, mean/median and maximum follow-up time, number of cancer deaths and effect  
21  
22 252 estimates (including confidence intervals) reported for cancer mortality/cancer survival. Individual  
23  
24 253 patient data for the aforementioned variables will be obtained from all trials with at least 20 cancer  
25  
26 254 deaths. If summary data are not published, they shall be calculated from the obtained data. All  
27  
28 255 authors will be contacted by e-mail with a maximum of three attempts sent with two weeks apart.  
29  
30

31 256 For the meta-analyses on cancer survival and cancer-specific survival, we will ask all authors who  
32  
33 257 conducted trials in the general population to provide IPD for cancer diagnoses in the five years prior  
34  
35 258 to baseline and during the trial (including cancer site with ICD-code, stage and diagnosis date). The  
36  
37 259 following IPD will be additionally collected: age, sex, BMI, race/ethnicity/skin color, baseline 25(OH)D  
38  
39  
40 260 levels, compliance, randomization group allocation, baseline date, deaths during follow-up with date,  
41  
42 261 cancer deaths with date, censoring dates for survival outcomes, and censoring date for patients not  
43  
44 262 dying of cancer. If IPD cannot be shared, the authors of the studies will be asked to conduct the  
45  
46 263 analyses in-house and to provide the summary estimates for the meta-analysis. If trial authors do  
47  
48 264 not collaborate, their study cannot be included in subgroup analyses for which no effect estimates  
49  
50 265 were published but the result from the total trial population will remain included in the main meta-  
51  
52 266 analysis.  
53  
54

55 267  
56  
57  
58  
59  
60

## Quality assessment

The protocol of the systematic review with all planned statistical analyses has been registered in PROSPERO before data collection to preclude data-driven analyses and selective reporting of only statistically significant findings. The study protocol has been developed in line with the “Preferred reporting items for systematic review and meta-analysis protocols” (PRISMA-P) as well as the Institute of Medicine guideline.(20-22) We will ensure to fulfill all requirements recommended by the current PRISMA guideline when writing the publication of the systematic review.(23, 24)

The Cochrane Collaboration’s tool for assessing risk of bias (table 8.5.a in the Cochrane Handbook for Systematic Review of Interventions) will be used to assess selection, performance, detection, attrition, reporting and other bias at study level.(25, 26) The following domains will be covered during the evaluation: sequence generation, allocation concealment, blinding, incomplete outcome data (e.g. withdrawals and dropouts), and selective outcome reporting. A summary assessment will be made based on the extracted items, judging whether the risk of bias in the respective study is low or high. If only insufficient data is reported, the risk of bias is “unclear” and the original study authors will be contacted for further information. The assessment will be conducted by two independent reviewers based on the criteria for judging the risk of bias (table 8.5.d in the Cochrane Handbook for Systematic Review of Interventions V.6).(26) In cases of disagreement, critical points will be discussed until a consensus is reached. The risk of bias evaluation will be incorporated into the data synthesis by performing a sensitivity analysis by excluding studies of low or unclear quality.

## Descriptive analysis and meta-analysis

### Measures of treatment effect

The mortality/survival outcomes shall be addressed by estimating hazard ratios (HR) and 95% confidence intervals (95%CI). Results of the intention-to-treat (ITT) approach will be used, including all patients randomized, if both ITT and per-protocol results are given.



1  
2 293 Data synthesis

3  
4  
5 294 As far as study quality and differences between studies allow, effect estimates of all eligible studies  
6  
7 295 with data for the following three main meta-analyses will be pooled deriving random effects results  
8  
9 296 with the DerSimonian and Laird method (primary analysis) and fixed effects summary estimates  
10  
11 297 using the Mantel-Haenzel method (secondary analysis).

- 12  
13 298 1) Association of vitamin D<sub>3</sub> supplementation and cancer mortality in the general population  
14  
15 299 2) Association of vitamin D<sub>3</sub> supplementation and cancer-specific survival of cancer patients  
16  
17 300 3) Association of vitamin D<sub>3</sub> supplementation and overall survival of cancer patients

18  
19  
20 301 For all studies that provide IPD, unadjusted Cox proportional hazard regression models will be used  
21  
22 302 to estimate HRs and 95% CIs for the main meta-analyses in which we will pool effect size data from  
23  
24 303 studies who do and who do not provide IPD in a two-step approach. For studies that cannot send  
25  
26 304 IPD to the coordinating center (German Cancer Research Center, Heidelberg), authors are being  
27  
28 305 asked to estimate the HRs and 95% CIs themselves and send the summary data for the meta-  
29  
30 306 analyses. To assess cancer survival as time-to-event data from general population cohorts, the study  
31  
32 307 will be restricted to patients with a history of cancer in the five years preceding baseline or a cancer  
33  
34 308 diagnosis during the trial. For the former, the survival time will be calculated from baseline to  
35  
36 309 death/end of the trial, and for the latter, survival time will be counted from the date of cancer diagnosis  
37  
38  
39 310 till death/end of the trial.

40  
41  
42 311 With all studies that agree to send IPD data to the coordinating center or to do additional analyses  
43  
44 312 in-house, we will also conduct an additional multivariate Cox proportional hazards regression model.  
45  
46 313 The model for the outcome cancer mortality among general population studies will contain the  
47  
48 314 variables vitamin D<sub>3</sub> intervention (vs. placebo), age (continuous; < 70 vs. ≥ 70 years), sex (male,  
49  
50 315 female, unknown), BMI (< 25 vs. 25 – 29.9 vs. ≥ 30 kg/m<sup>2</sup> vs. unknown), skin color (white vs.  
51  
52 316 black/brown vs. other), 25(OH)D baseline level (< 30 vs. 30 – 49.9 nmol/L vs. ≥ 50 nmol/L vs.  
53  
54 317 unknown), diagnosis of cancer (except non-melanoma skin cancer) in five years before baseline  
55  
56 318 (yes vs. no vs. unknown), and compliance (< 80% vs. ≥ 80% vs. unknown). The models for the  
57  
58  
59 319 outcomes overall and cancer-specific survival of cancer patients will be adjusted for the same  
60  
320 variables but the cancer variable will be replaced by more specific variables for cancer stage (only

1  
2 321 advanced stages III and/or IV vs. unknown), cancer site (prostate vs. colorectal vs. breast vs. lung  
3  
4 322 vs. other vs. unknown) and time since cancer diagnosis (<1 year vs. 1-5 years). We will test for  
5  
6 323 interactions of the treatment variable (vitamin D<sub>3</sub> vs. placebo) with these covariates to identify  
7  
8 324 potential effect modifiers. Again, a two-step approach will be used for the meta-analyses, whereby  
9  
10 325 the analyses are carried out on a study-specific basis, and then the effect estimates are pooled. To  
11  
12 326 further explore the variation of the treatment effect by methodological or patient characteristics  
13  
14 327 differences of the studies, the following subgroup analyses will be performed with IPD data and  
15  
16 328 studies that published eligible data:

#### 17 329 Subgroup analyses according to trial design

- 22 330 - Daily dose vs. weekly/monthly bolus dose vs. bolus dose at the beginning of the trial followed  
23  
24 331 by a daily dose
- 26 332 - Low vs. moderate vs. high vitamin D<sub>3</sub> dosing (< 1000 IU vs. 1,000 – 2,000 IU vs. > 2,000 IU  
27  
28 333 per day or equivalent weekly or monthly taken dose)
- 30 334 - Vitamin D<sub>3</sub> supplementation duration (< 5 vs. ≥ 5 years)
- 32 335 - Region (North America vs. Europe vs. Other)

#### 35 336 Subgroup analyses according to patient characteristics

- 38 337 - Age (< 70 vs. ≥ 70 years)
- 39  
40 338 - Sex (Male vs. female)
- 42 339 - Skin color (white vs. black/brown vs. other)
- 43  
44 340 - BMI (< 25 vs. 25 – 29.9 vs. ≥ 30 kg/m<sup>2</sup>)
- 45  
46 341 - Baseline 25(OH)D levels (< 30 vs. 30 – 49.9 nmol/L vs. ≥ 50 nmol/L)
- 47  
48 342 - Compliance rate (< 80% vs. ≥ 80%)

#### 51 343 For meta-analyses conducted in cancer patients in addition:

- 53 344 - Cancer stage (mix of all stages vs. only advanced stages III and/or IV)
- 55  
56 345 - Cancer site (Prostate vs. colorectal vs. breast vs. lung vs. other)
- 57  
58 346 - Time since cancer diagnosis (<1 year vs. 1-5 years)

1  
2 347 Analyses in the coordinating center will be done with the statistical software SAS 9.4. The meta-  
3  
4 348 analyses will be performed with Comprehensive Meta-Analysis 2.0 (Biostat, Englewood, NJ).

5  
6  
7 349 Assessment of heterogeneity

8  
9  
10 350 Heterogeneity will be presented visually by forest plots and assessed statistically by Cochran's Q  
11  
12 351 test (significance level = 0.05) as well as the  $I^2$  index (< 25% low, 25-50% moderate, > 50% high  
13  
14 352 heterogeneity). Meta-Analyses will be conducted even if high heterogeneity is being detected and  
15  
16 353 the results will be discussed taking the heterogeneity into consideration. Sources of heterogeneity  
17  
18  
19 354 will be explored by the subgroup analyses outlined in the previous section and the following  
20  
21 355 sensitivity analyses:

- 22  
23 356 - Excluding studies with a high risk of bias according to assessment with the Cochrane  
24  
25 357 Collaboration's tool  
26  
27 358 - Excluding studies not reporting ITT results  
28  
29 359 - Excluding trials with co-supplementation of calcium  
30  
31

32 360 Assessment of publication bias

33  
34  
35 361 Publication bias will be accessed visually in funnel plots and tested for with Egger's test.  
36  
37

38 362 Dealing with missing data

39  
40  
41  
42 363 In case of missing data, we will seek contact with the original investigators. If possible, we will  
43  
44 364 calculate missing numerical data from the given reported data.  
45  
46

47 365 Strength of the body of evidence

48  
49  
50 366 The quality of the evidence for each outcome will be evaluated using the Grading of  
51  
52 367 Recommendations Assessment, Development and Evaluation (GRADE) approach. The four levels  
53  
54 368 of evidence comprise very low, low, moderate, and high. Evidence from RCTs starts as high quality  
55  
56 369 but can be decreased for reasons such as the risk of bias, imprecision, inconsistency, indirectness,  
57  
58 370 and publication bias.  
59  
60

## 371 **Amendments**

372 In the case of protocol amendments, we will document the date, the description of the change and  
373 the rationale in a pre-defined log sheet in Microsoft Word or Excel.

## 375 **Patient and public involvement**

376 Patients and the public were not involved in the development of the study design. Since this is a  
377 protocol for a systematic review and no participant recruitment will take place, the involvement of  
378 patients in the recruitment, the conduct of the study and the dissemination of findings to study  
379 participants are not applicable.

## 381 **Dissemination**

382 The systematic review will be published in an international journal for clinical oncology or general  
383 medicine with open access option and presented in national and international meetings. If the meta-  
384 analyses of the systematic review obtain statistically significant findings, we expect the result to be  
385 reflected in national and international guidelines and to change the current practice of tertiary  
386 prevention among cancer patients. Vitamin D<sub>3</sub> is already on the market in various doses and at low  
387 costs because it is not patented.

388 Patients will be informed via a press release from the German Cancer Research Center. Moreover,  
389 we will send a summary of the results in a language suitable for laypersons to all patient advocacy  
390 groups recommended by the Cancer Information Service of the German Cancer Research Center  
391 (up to data n = 30) for further dissemination among their members.(27) With respect to oncologists,  
392 we will disseminate the results to all German rehabilitation centers with a ward for oncologic  
393 rehabilitation, as listed in the register of the *Bundesarbeitsgemeinschaft für Rehabilitation e.V.*(28)  
394 As the topic of the review is in the field of tertiary prevention, oncologists in the rehabilitation setting  
395 are the target audience for information dissemination.

1  
2 396 **DISCUSSION**

3  
4  
5 397 One of the strengths of this systematic review comprises the first meta-analysis on vitamin D  
6  
7 398 supplementation and cancer survival and additionally the first IPD meta-analysis on this research  
8  
9 399 topic. The IPD meta-analysis will allow the investigation of potential effect modifiers. Especially  
10  
11 400 25(OH)D levels at baseline, BMI, and compliance are candidates that could have had a great impact  
12  
13 401 on the overall trial results.

14  
15  
16 402 The creation of this research protocol prompted us to plan carefully all the details of the systematic  
17  
18 403 review and to anticipate and address potential problems before their actual occurrence. Arbitrary  
19  
20 404 decision making concerning any procedure of this systematic review is prevented, resulting again in  
21  
22  
23 405 a decreased risk of publication bias and selective reporting bias. The protocol allows reproducible  
24  
25 406 and transparent research for future reviewers.

26  
27  
28 407 Possible limitations of our review include a potentially insufficient number of cancer deaths in the  
29  
30 408 studies and high heterogeneity, which could both negatively influence the statistical power of the  
31  
32 409 meta-analyses. However, it is too early now to judge if these limitations will really occur.

33  
34  
35 410 The quality of selected studies will be assessed and the quality of the evidence will be judged. The  
36  
37 411 ultimate goal is to ensure the reporting of highly meaningful findings for clinicians and patients.  
38  
39 412 Oncologists are well aware that vitamin D deficiency and insufficiency are very common in cancer  
40  
41 413 patients but there is uncertainty about whether and how they should routinely perform preventive  
42  
43  
44 414 screening and treatments. In some clinics, all cancer patients receive low-dose vitamin D with a “one  
45  
46 415 dose fits all” approach, which does not take individual 25(OH)D levels of the patients into account.  
47  
48 416 Since vitamin D products are readily available in pharmacies or drug stores, many patients use low-  
49  
50 417 dose vitamin D supplementation as self-medication. Yet, it can be doubted whether this untargeted  
51  
52 418 intervention has any effect on cancer prognosis. Consequently, evidence-based recommendations  
53  
54 419 for high-dose vitamin D supplementation are highly relevant for both, clinicians and patients.

55  
56  
57 420 If the planned systematic review determines the efficacy of vitamin D supplementation on cancer  
58  
59 421 prognosis in the expected magnitude of 10-15%, the review will be used to provide clear suggestions

1  
2 422 on how vitamin D can be appropriately dosed to overcome vitamin D deficiency or insufficiency in  
3  
4 423 cancer patients.(12) Furthermore, our systematic review would provide the evidence for statutory  
5  
6 424 health insurances to cover the costs for screening for vitamin D deficiency or insufficiency in cancer  
7  
8 425 patients and a subsequent vitamin D supplementation. With expected relatively large effects and  
9  
10 426 very low screening and treatment costs (a vitamin D blood test costs approx. € 20, and one year of  
11  
12 427 vitamin D therapy costs less than € 100), vitamin D supplementation will be highly cost-effective.  
13  
14 428 The costs would be close to negligible compared to other current cancer treatment costs.

### 16 17 429 18 19 430 **Status**

20  
21 431 At the time of submission, the study selection for the systematic review has not started.  
22  
23 432

### 24 25 433 **Acknowledgements**

26  
27 434 The authors thank the Helmholtz International Graduate School for Cancer Research (HIGS) at the  
28  
29 435 German Cancer Research Center, Heidelberg, for supporting this research with a doctoral  
30  
31 436 scholarship to Sabine Kuznia.

### 32 33 437 34 35 438 **Authors' contribution**

36  
37 439 BS and SK are the guarantors of the systematic review. BS designed the search strategy, the  
38  
39 440 selection criteria, the risk of bias assessment strategy, the data extraction criteria, and the statistical  
40  
41 441 methods. SK drafted the first version of the protocol publication, which BS and HB revised.  
42  
43 442

### 44 45 443 **Contributors**

46  
47 444 The following researchers have agreed to contribute to this systematic review by sharing IPD and  
48  
49 445 giving intellectual input for the discussion of the results: Taisuke Akutsu (Jikei University School of  
50  
51 446 Medicine. Tokyo, Japan), professor Julie E. Buring (ScD. Brigham and Women's Hospital and  
52  
53 447 Harvard Medical School. Boston), Professor Carlos A. Camargo Jr (MD, DrPH. Massachusetts  
54  
55 448 General Hospital, Harvard Medical School. Boston), Professor Nancy R. Cook (ScD. Brigham and  
56  
57 449 Women's Hospital and Harvard Medical School. Boston), professor I-Min Lee (MB, BS, ScD.  
58  
59 450 Brigham and Women's Hospital and Harvard Medical School. Boston), Professor JoAnn E. Manson

1  
2 451 (MD, Dr. PH. Brigham and Women's Hospital and Harvard Medical School. Boston), Professor  
3  
4 452 Robert Scragg (MBBS, PhD. School of Population Health, University of Auckland. Auckland, New  
5  
6 453 Zealand), John Sluyter (PhD. School of Population Health, University of Auckland. Auckland, New  
7  
8 454 Zealand), professor Mitsuyoshi Urashima (MD. Jikei University School of Medicine. Tokyo, Japan),  
9  
10 455 professor Jean Wactawski-Wende (PhD. University at Buffalo. Buffalo, New York).

11  
12 456

#### 13 14 15 457 **Funding**

16  
17 458 A grant proposal has been submitted to the German Federal Ministry of Education and Research  
18  
19 459 (BMBF). The German Cancer Research Center is the sponsor. Neither funder nor sponsor will have  
20  
21 460 a role in the design of the review protocol, data collection, data analyses, the interpretation of results,  
22  
23 461 or the decision about the publication of the results.

24  
25 462

#### 26 27 463 **Data availability statement**

28  
29 464 As no new data are obtained in this systematic review, no data will be made publicly available to  
30  
31 465 third parties. Decisions on data use by third parties can only be made by the principal investigators  
32  
33 466 of the original studies, taking into account the votes of the responsible ethics committees.

34  
35  
36  
37 467

#### 38 468 **Disclaimer**

39  
40 469 The views of the authors do not necessarily reflect those of the German Cancer Research Center.

41  
42  
43 470

#### 44 45 471 **Competing interests**

46  
47 472 None declared.

48  
49 473

#### 50 51 474 **Patient consent for publication**

52  
53 475 Not required.

54  
55 476

#### 56 57 477 **Provenance and peer review**

58  
59 478 Not commissioned; externally peer-reviewed

60

1  
2 479 **REFERENCES**  
3 480

- 4 481 1. International Agency for Research on Cancer. Press Release No 263: Latest global cancer  
5 482 data: Cancer burden rises to 18.1 million new cases and 9.6 million cancer deaths in 2018.  
6 483 Available from: [https://www.iarc.fr/wp-content/uploads/2018/09/pr263\\_E.pdf](https://www.iarc.fr/wp-content/uploads/2018/09/pr263_E.pdf). Accessed: 9  
7 484 May 2020.
- 8  
9 485 2. Zhang L, Wang S, Che X, et al. Vitamin D and lung cancer risk: a comprehensive review  
10 486 and meta-analysis. *Cell Physiol Biochem*. 2015;36(1):299-305. doi:10.1159/000374072.  
11
- 12 487 3. Garland CF, Gorham ED. Dose-response of serum 25-hydroxyvitamin D in association with  
13 488 risk of colorectal cancer: A meta-analysis. *J Steroid Biochem Mol Biol*. 2017;168:1-8.  
14 489 doi:10.1016/j.jsbmb.2016.12.003.  
15
- 16 490 4. Li M, Chen P, Li J, et al. Review: the impacts of circulating 25-hydroxyvitamin D levels on  
17 491 cancer patient outcomes: a systematic review and meta-analysis. *J Clin Endocrinol Metab*.  
18 492 2014;99(7):2327-36. doi:10.1210/jc.2013-4320.
- 19  
20  
21 493 5. Zhang H, Zhang H, Wen X, et al. Vitamin D Deficiency and Increased Risk of Bladder  
22 494 Carcinoma: A Meta-Analysis. *Cell Physiol Biochem*. 2015;37(5):1686-92.  
23 495 doi:10.1159/000438534.
- 24  
25 496 6. Heath AK, Kim IY, Hodge AM, et al. Vitamin D Status and Mortality: A Systematic Review  
26 497 of Observational Studies. *Int J Environ Res Public Health*. 2019;16(3):383.  
27 498 doi:10.3390/ijerph16030383.  
28
- 29 499 7. Schöttker B, Haug U, Schomburg L, et al. Strong associations of 25-hydroxyvitamin D  
30 500 concentrations with all-cause, cardiovascular, cancer, and respiratory disease mortality in a  
31 501 large cohort study. *Am J Clin Nutr*. 2013;97(4):782-93. doi:10.3945/ajcn.112.047712.  
32
- 33 502 8. Moukayed M, Grant WB. Molecular link between vitamin D and cancer prevention.  
34 503 *Nutrients*. 2013;5(10):3993-4021. doi:10.3390/nu5103993.  
35
- 36 504 9. Afzal S, Brøndum-Jacobsen P, Bojesen SE, et al. Genetically low vitamin D concentrations  
37 505 and increased mortality: mendelian randomisation analysis in three large cohorts. *BMJ*.  
38 506 2014;349:g6330. doi:10.1136/bmj.g6330.  
39
- 40 507 10. Rejnmark L, Bislev LS, Cashman KD, et al. Non-skeletal health effects of vitamin D  
41 508 supplementation: A systematic review on findings from meta-analyses summarizing trial  
42 509 data. *PLoS One*. 2017;12(7):e0180512. doi:10.1371/journal.pone.0180512.  
43
- 44 510 11. Bjelakovic G, Gluud LL, Nikolova D, et al. Vitamin D supplementation for prevention of  
45 511 mortality in adults. *Cochrane Database Syst Rev*. 2011(7).  
46 512 doi:10.1002/14651858.CD007470.pub2.  
47
- 48  
49 513 12. Keum N, Lee DH, Greenwood DC, et al. Vitamin D supplementation and total cancer  
50 514 incidence and mortality: a meta-analysis of randomized controlled trials. *Ann Oncol*.  
51 515 2019;30(5):733-43. doi:10.1093/annonc/mdz059.  
52
- 53 516 13. Goulão B, Stewart F, Ford JA, et al. Cancer and vitamin D supplementation: a systematic  
54 517 review and meta-analysis. *Am J Clin Nutr*. 2018;107(4):652-63. doi:10.1093/ajcn/nqx047.  
55
- 56 518 14. Zhang Y, Fang F, Tang J, et al. Association between vitamin D supplementation and  
57 519 mortality: systematic review and meta-analysis. *BMJ*. 2019;366:l4673.  
58 520 doi:10.1136/bmj.l4673 %J BMJ.  
59
- 60 521 15. Brenner H, Jansen L, Saum K-U, et al. Vitamin D Supplementation Trials Aimed at  
522 Reducing Mortality Have Much Higher Power When Focusing on People with Low Serum



- 1  
2 523 25-Hydroxyvitamin D Concentrations. *J Nutr.* 2017;147(7):1325-33.  
3 524 doi:10.3945/jn.117.250191.  
4
- 5 525 16. Maalmi H, Walter V, Jansen L, et al. Association between Blood 25-Hydroxyvitamin D  
6 526 Levels and Survival in Colorectal Cancer Patients: An Updated Systematic Review and  
7 527 Meta-Analysis. *Nutrients.* 2018;10(7):896. doi:10.3390/nu10070896.  
8
- 9 528 17. Maalmi H, Walter V, Jansen L, et al. Relationship of very low serum 25-hydroxyvitamin D3  
10 529 levels with long-term survival in a large cohort of colorectal cancer patients from Germany.  
11 530 *Eur J Epidemiol.* 2017;32(11):961-71. doi:10.1007/s10654-017-0298-z.  
12
- 13 531 18. Toriola AT, Nguyen N, Scheitler-Ring K, et al. Circulating 25-hydroxyvitamin D levels and  
14 532 prognosis among cancer patients: a systematic review. *Cancer Epidemiol Biomarkers Prev.*  
15 533 2014;23(6):917-33. doi:10.1158/1055-9965.EPI-14-0053.  
16
- 17 534 19. Heaney RP, Armas LAG. Quantifying the vitamin D economy. *Nutr Rev.* 2014;73(1):51-67.  
18 535 doi:10.1093/nutrit/nuu004.  
19
- 20 536 20. Moher D, Shamseer L, Clarke M, et al. Preferred reporting items for systematic review and  
21 537 meta-analysis protocols (PRISMA-P) 2015 statement. *Syst Rev.* 2015;4(1):1.  
22 538 doi:10.1186/2046-4053-4-1.  
23 539
- 24 539 21. Shamseer L, Moher D, Clarke M, et al. Preferred reporting items for systematic review and  
25 540 meta-analysis protocols (PRISMA-P) 2015: elaboration and explanation. *BMJ.*  
26 541 2015;349:g7647. doi:10.1136/bmj.g7647 %J BMJ : British Medical Journal.  
27 542
- 28 542 22. Institute of Medicine 2011. Finding What Works in Health Care: Standards for Systematic  
29 543 Reviews. Washington, DC: The National Academies Press. doi:10.17226/13059.  
30 544
- 31 544 23. Moher D, Liberati A, Tetzlaff J, et al. Preferred reporting items for systematic reviews and  
32 545 meta-analyses: the PRISMA statement. *PLoS Med.* 2009;6(7):e1000097.  
33 546 doi:10.1371/journal.pmed.1000097.  
34 547
- 35 547 24. Liberati A, Altman DG, Tetzlaff J, et al. The PRISMA statement for reporting systematic  
36 548 reviews and meta-analyses of studies that evaluate health care interventions: explanation  
37 549 and elaboration. *PLoS Med.* 2009;6(7):e1000100. doi:10.1371/journal.pmed.1000100.  
38 549
- 39 550 25. Higgins JPT, Altman DG, Gøtzsche PC, et al. The Cochrane Collaboration's tool for  
40 551 assessing risk of bias in randomised trials. *BMJ.* 2011;343:d5928. doi:10.1136/bmj.d5928  
41 552 %J BMJ.  
42 552
- 43 553 26. Higgins JPT, Thomas J, Chandler J, Cumpston M, Li T, Page MJ, Welch VA (editors).  
44 554 Cochrane Handbook for Systematic Reviews of Interventions version 6.0 (updated July  
45 555 2019). Cochrane, 2019. Available from [www.training.cochrane.org/handbook](http://www.training.cochrane.org/handbook).  
46 555
- 47 556 27. Krebsinformationsdienst Deutsches Krebsforschungszentrum. Krebs-Selbsthilfegruppen  
48 557 und Patientenverbände. Updated 06 August 2018. Available from:  
49 558 <https://www.krebsinformationsdienst.de/service/adressen/selbsthilfe.php#inhalt17>.  
50 559 Accessed: 9 May 2020.  
51 559
- 52 560 28. BAR e.V. BAR-Verzeichnis von stationären Einrichtungen der medizinischen Rehabilitation.  
53 561 Available from: [https://www.bar-frankfurt.de/service/datenbanken-](https://www.bar-frankfurt.de/service/datenbanken-verzeichnisse/rehaklinikenverzeichnis/rehastatten-suche.html)  
54 562 [verzeichnisse/rehaklinikenverzeichnis/rehastatten-suche.html](https://www.bar-frankfurt.de/service/datenbanken-verzeichnisse/rehaklinikenverzeichnis/rehastatten-suche.html). Accessed: 9 May 2020.  
55 561  
56 562  
57  
58  
59  
60

1  
2 563 **Appendix 1:**  
3

4 564 Supplementary material consisting of data extraction form, risk of bias assessment and list of  
5  
6  
7 565 individual patient data to be obtained from original researchers  
8  
9  
10  
11  
12  
13  
14  
15  
16  
17  
18  
19  
20  
21  
22  
23  
24  
25  
26  
27  
28  
29  
30  
31  
32  
33  
34  
35  
36  
37  
38  
39  
40  
41  
42  
43  
44  
45  
46  
47  
48  
49  
50  
51  
52  
53  
54  
55  
56  
57  
58  
59  
60

For peer review only

1  
2  
3  
4  
5  
6  
7  
8  
9  
10  
11  
12  
13  
14  
15  
16  
17  
18  
19  
20  
21  
22  
23  
24  
25  
26  
27  
28  
29  
30  
31  
32  
33  
34  
35  
36  
37  
38  
39  
40  
41  
42  
43  
44  
45  
46  
47  
48  
49  
50  
51  
52  
53  
54  
55  
56  
57  
58  
59  
60

**Figure**

566  
567  
568

**Figure 1:** Draft of the search strategy and study selection process

For peer review only

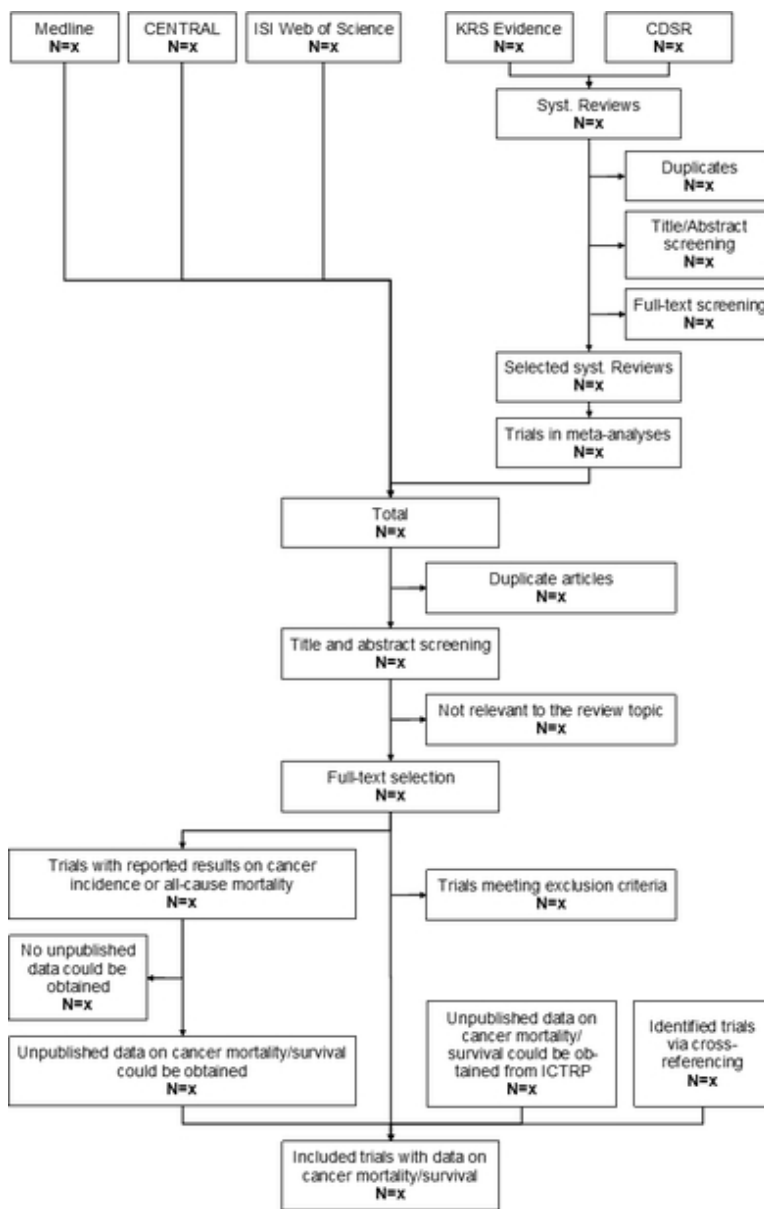

Figure 1: Draft of the search strategy and study selection process

16x25mm (600 x 600 DPI)

Appendix 1 -Data Extraction Form

Table A1 - Extraction of data from publications

| Study                                    |         |             | Population               |                         |                     |                      |                |                                       |                                              |                             | Intervention                          |                                                    |                                      |
|------------------------------------------|---------|-------------|--------------------------|-------------------------|---------------------|----------------------|----------------|---------------------------------------|----------------------------------------------|-----------------------------|---------------------------------------|----------------------------------------------------|--------------------------------------|
| First author (or study name), Year (REF) | Country | Sample size | General population (y/n) | Cancer population (y/n) | Cancer site + stage | Age (mean or median) | Sex (female %) | Race/ ethnicity/ skin color (white %) | BMI [kg/m <sup>2</sup> ] (n, mean or median) | 25(OH)D (n, mean or median) | Vitamin D <sub>3</sub> dosing regimen | Duration of vitamin D <sub>3</sub> supplementation | Compliance in intervention group (%) |
|                                          |         |             |                          |                         |                     |                      |                |                                       |                                              |                             |                                       |                                                    |                                      |
|                                          |         |             |                          |                         |                     |                      |                |                                       |                                              |                             |                                       |                                                    |                                      |
|                                          |         |             |                          |                         |                     |                      |                |                                       |                                              |                             |                                       |                                                    |                                      |
|                                          |         |             |                          |                         |                     |                      |                |                                       |                                              |                             |                                       |                                                    |                                      |
|                                          |         |             |                          |                         |                     |                      |                |                                       |                                              |                             |                                       |                                                    |                                      |
|                                          |         |             |                          |                         |                     |                      |                |                                       |                                              |                             |                                       |                                                    |                                      |
|                                          |         |             |                          |                         |                     |                      |                |                                       |                                              |                             |                                       |                                                    |                                      |
|                                          |         |             |                          |                         |                     |                      |                |                                       |                                              |                             |                                       |                                                    |                                      |
|                                          |         |             |                          |                         |                     |                      |                |                                       |                                              |                             |                                       |                                                    |                                      |
|                                          |         |             |                          |                         |                     |                      |                |                                       |                                              |                             |                                       |                                                    |                                      |
|                                          |         |             |                          |                         |                     |                      |                |                                       |                                              |                             |                                       |                                                    |                                      |
|                                          |         |             |                          |                         |                     |                      |                |                                       |                                              |                             |                                       |                                                    |                                      |
|                                          |         |             |                          |                         |                     |                      |                |                                       |                                              |                             |                                       |                                                    |                                      |
|                                          |         |             |                          |                         |                     |                      |                |                                       |                                              |                             |                                       |                                                    |                                      |
|                                          |         |             |                          |                         |                     |                      |                |                                       |                                              |                             |                                       |                                                    |                                      |
|                                          |         |             |                          |                         |                     |                      |                |                                       |                                              |                             |                                       |                                                    |                                      |
|                                          |         |             |                          |                         |                     |                      |                |                                       |                                              |                             |                                       |                                                    |                                      |
|                                          |         |             |                          |                         |                     |                      |                |                                       |                                              |                             |                                       |                                                    |                                      |
|                                          |         |             |                          |                         |                     |                      |                |                                       |                                              |                             |                                       |                                                    |                                      |

1  
2  
3  
4  
5  
6  
7  
8  
9  
10  
11  
12  
13  
14  
15  
16  
17  
18  
19  
20  
21  
22  
23  
24  
25  
26  
27  
28  
29  
30  
31  
32  
33  
34  
35  
36  
37  
38  
39  
40  
41  
42  
43  
44  
45  
46

| Comparator        |                                    | Outcomes               |                               |                     |                                                    |                                                         |                                                |                         | Comments |
|-------------------|------------------------------------|------------------------|-------------------------------|---------------------|----------------------------------------------------|---------------------------------------------------------|------------------------------------------------|-------------------------|----------|
| Placebo (y/other) | Compliance in comparator group (%) | Maximum follow-up time | Mean or median follow-up time | No of cancer deaths | Cancer mortality in general population HR (95% CI) | Cancer-specific survival of cancer patients HR (95% CI) | Overall survival of cancer patients HR (95%CI) | Covariates adjusted for |          |
|                   |                                    |                        |                               |                     |                                                    |                                                         |                                                |                         |          |
|                   |                                    |                        |                               |                     |                                                    |                                                         |                                                |                         |          |
|                   |                                    |                        |                               |                     |                                                    |                                                         |                                                |                         |          |
|                   |                                    |                        |                               |                     |                                                    |                                                         |                                                |                         |          |
|                   |                                    |                        |                               |                     |                                                    |                                                         |                                                |                         |          |
|                   |                                    |                        |                               |                     |                                                    |                                                         |                                                |                         |          |
|                   |                                    |                        |                               |                     |                                                    |                                                         |                                                |                         |          |
|                   |                                    |                        |                               |                     |                                                    |                                                         |                                                |                         |          |
|                   |                                    |                        |                               |                     |                                                    |                                                         |                                                |                         |          |
|                   |                                    |                        |                               |                     |                                                    |                                                         |                                                |                         |          |
|                   |                                    |                        |                               |                     |                                                    |                                                         |                                                |                         |          |
|                   |                                    |                        |                               |                     |                                                    |                                                         |                                                |                         |          |
|                   |                                    |                        |                               |                     |                                                    |                                                         |                                                |                         |          |
|                   |                                    |                        |                               |                     |                                                    |                                                         |                                                |                         |          |
|                   |                                    |                        |                               |                     |                                                    |                                                         |                                                |                         |          |
|                   |                                    |                        |                               |                     |                                                    |                                                         |                                                |                         |          |
|                   |                                    |                        |                               |                     |                                                    |                                                         |                                                |                         |          |
|                   |                                    |                        |                               |                     |                                                    |                                                         |                                                |                         |          |
|                   |                                    |                        |                               |                     |                                                    |                                                         |                                                |                         |          |
|                   |                                    |                        |                               |                     |                                                    |                                                         |                                                |                         |          |
|                   |                                    |                        |                               |                     |                                                    |                                                         |                                                |                         |          |
|                   |                                    |                        |                               |                     |                                                    |                                                         |                                                |                         |          |
|                   |                                    |                        |                               |                     |                                                    |                                                         |                                                |                         |          |
|                   |                                    |                        |                               |                     |                                                    |                                                         |                                                |                         |          |
|                   |                                    |                        |                               |                     |                                                    |                                                         |                                                |                         |          |
|                   |                                    |                        |                               |                     |                                                    |                                                         |                                                |                         |          |

**Table A2 - Risk of Bias Assessment**

| First author (or study name), Year (REF) | Sequence generation | Allocation concealment | Blinding | Incomplete outcome data | Selective reporting | Other bias |
|------------------------------------------|---------------------|------------------------|----------|-------------------------|---------------------|------------|
|                                          |                     |                        |          |                         |                     |            |
|                                          |                     |                        |          |                         |                     |            |
|                                          |                     |                        |          |                         |                     |            |
|                                          |                     |                        |          |                         |                     |            |
|                                          |                     |                        |          |                         |                     |            |
|                                          |                     |                        |          |                         |                     |            |
|                                          |                     |                        |          |                         |                     |            |
|                                          |                     |                        |          |                         |                     |            |
|                                          |                     |                        |          |                         |                     |            |
|                                          |                     |                        |          |                         |                     |            |
|                                          |                     |                        |          |                         |                     |            |
|                                          |                     |                        |          |                         |                     |            |
|                                          |                     |                        |          |                         |                     |            |
|                                          |                     |                        |          |                         |                     |            |
|                                          |                     |                        |          |                         |                     |            |
|                                          |                     |                        |          |                         |                     |            |
|                                          |                     |                        |          |                         |                     |            |
|                                          |                     |                        |          |                         |                     |            |
|                                          |                     |                        |          |                         |                     |            |

For peer review only

**Table A3 - Variables to be obtained for all trial participants in order to conduct the IPD meta-analysis**

| No. | Variables                                                                  |
|-----|----------------------------------------------------------------------------|
| 1   | Age                                                                        |
| 2   | Sex                                                                        |
| 3   | BMI                                                                        |
| 4   | Race/ethnicity/skin color                                                  |
| 5   | Baseline 25(OH)D levels                                                    |
| 6   | Compliance                                                                 |
| 7   | Randomisation group allocation                                             |
| 8   | Baseline date                                                              |
| 9   | Death during follow-up (y/n)                                               |
| 10  | Date of death                                                              |
| 11  | Censoring date for survivors                                               |
| 12  | Cancer death during follow-up (y/n)                                        |
| 13  | Date of cancer death                                                       |
| 14  | Censoring date for non-cancer deaths                                       |
| 15  | Cancer* diagnosis during follow-up (y/n)                                   |
| 16  | Cancer* site for each cancer during follow-up                              |
| 17  | Cancer* stage for each cancer during follow-up                             |
| 18  | Date of cancer* diagnosis for each cancer during follow-up                 |
| 19  | Cancer* diagnosis in first 5 years before baseline (y/n)                   |
| 20  | Cancer* site for each cancer in first 5 years before baseline              |
| 21  | Cancer* stage for each cancer in first 5 years before baseline             |
| 22  | Date of cancer* diagnosis for each cancer in first 5 years before baseline |

\* Excluding non-melanoma skin cancers



## PRISMA-P 2015 Checklist

This checklist has been adapted for use with protocol submissions to *Systematic Reviews* from Table 3 in Moher D et al: Preferred reporting items for systematic review and meta-analysis protocols (PRISMA-P) 2015 statement. *Systematic Reviews* 2015 4:1

| Section/topic                     | #  | Checklist item                                                                                                                                                                                  | Information reported                |                                     | Line number(s)          |
|-----------------------------------|----|-------------------------------------------------------------------------------------------------------------------------------------------------------------------------------------------------|-------------------------------------|-------------------------------------|-------------------------|
|                                   |    |                                                                                                                                                                                                 | Yes                                 | No                                  |                         |
| <b>ADMINISTRATIVE INFORMATION</b> |    |                                                                                                                                                                                                 |                                     |                                     |                         |
| <b>Title</b>                      |    |                                                                                                                                                                                                 |                                     |                                     |                         |
| Identification                    | 1a | Identify the report as a protocol of a systematic review                                                                                                                                        | <input checked="" type="checkbox"/> | <input type="checkbox"/>            | 1-4                     |
| Update                            | 1b | If the protocol is for an update of a previous systematic review, identify as such                                                                                                              | <input type="checkbox"/>            | <input checked="" type="checkbox"/> | n.a. (first submission) |
| <b>Registration</b>               | 2  | If registered, provide the name of the registry (e.g., PROSPERO) and registration number in the Abstract                                                                                        | <input checked="" type="checkbox"/> | <input type="checkbox"/>            | 63-66                   |
| <b>Authors</b>                    |    |                                                                                                                                                                                                 |                                     |                                     |                         |
| Contact                           | 3a | Provide name, institutional affiliation, and e-mail address of all protocol authors; provide physical mailing address of corresponding author                                                   | <input checked="" type="checkbox"/> | <input type="checkbox"/>            | 6-34                    |
| Contributions                     | 3b | Describe contributions of protocol authors and identify the guarantor of the review                                                                                                             | <input checked="" type="checkbox"/> | <input type="checkbox"/>            | 438-441                 |
| <b>Amendments</b>                 | 4  | If the protocol represents an amendment of a previously completed or published protocol, identify as such and list changes; otherwise, state plan for documenting important protocol amendments | <input checked="" type="checkbox"/> | <input type="checkbox"/>            | 371-373                 |
| <b>Support</b>                    |    |                                                                                                                                                                                                 |                                     |                                     |                         |
| Sources                           | 5a | Indicate sources of financial or other support for the review                                                                                                                                   | <input checked="" type="checkbox"/> | <input type="checkbox"/>            | 457-461                 |
| Sponsor                           | 5b | Provide name for the review funder and/or sponsor                                                                                                                                               | <input checked="" type="checkbox"/> | <input type="checkbox"/>            | 457-461                 |
| Role of sponsor/funder            | 5c | Describe roles of funder(s), sponsor(s), and/or institution(s), if any, in developing the protocol                                                                                              | <input checked="" type="checkbox"/> | <input type="checkbox"/>            | 459-461                 |
| <b>INTRODUCTION</b>               |    |                                                                                                                                                                                                 |                                     |                                     |                         |
| <b>Rationale</b>                  | 6  | Describe the rationale for the review in the context of what is already known                                                                                                                   | <input checked="" type="checkbox"/> | <input type="checkbox"/>            | 77-123                  |
| <b>Objectives</b>                 | 7  | Provide an explicit statement of the question(s) the review will address with reference to participants, interventions, comparators, and outcomes (PICO)                                        | <input checked="" type="checkbox"/> | <input type="checkbox"/>            | 125-141                 |
| <b>METHODS</b>                    |    |                                                                                                                                                                                                 |                                     |                                     |                         |

| Section/topic                             | #   | Checklist item                                                                                                                                                                                                                              | Information reported                |                                     | Line number(s)                     |
|-------------------------------------------|-----|---------------------------------------------------------------------------------------------------------------------------------------------------------------------------------------------------------------------------------------------|-------------------------------------|-------------------------------------|------------------------------------|
|                                           |     |                                                                                                                                                                                                                                             | Yes                                 | No                                  |                                    |
| <b>Eligibility criteria</b>               | 8   | Specify the study characteristics (e.g., PICO, study design, setting, time frame) and report characteristics (e.g., years considered, language, publication status) to be used as criteria for eligibility for the review                   | <input checked="" type="checkbox"/> | <input type="checkbox"/>            | 148-188                            |
| <b>Information sources</b>                | 9   | Describe all intended information sources (e.g., electronic databases, contact with study authors, trial registers, or other grey literature sources) with planned dates of coverage                                                        | <input checked="" type="checkbox"/> | <input type="checkbox"/>            | 198-231, 256-266                   |
| <b>Search strategy</b>                    | 10  | Present draft of search strategy to be used for at least one electronic database, including planned limits, such that it could be repeated                                                                                                  | <input checked="" type="checkbox"/> | <input type="checkbox"/>            | 198-231, 223-224, 230-231, 566-569 |
| <b>STUDY RECORDS</b>                      |     |                                                                                                                                                                                                                                             |                                     |                                     |                                    |
| Data management                           | 11a | Describe the mechanism(s) that will be used to manage records and data throughout the review                                                                                                                                                | <input checked="" type="checkbox"/> | <input type="checkbox"/>            | 233-266                            |
| Selection process                         | 11b | State the process that will be used for selecting studies (e.g., two independent reviewers) through each phase of the review (i.e., screening, eligibility, and inclusion in meta-analysis)                                                 | <input checked="" type="checkbox"/> | <input type="checkbox"/>            | 234-245                            |
| Data collection process                   | 11c | Describe planned method of extracting data from reports (e.g., piloting forms, done independently, in duplicate), any processes for obtaining and confirming data from investigators                                                        | <input checked="" type="checkbox"/> | <input type="checkbox"/>            | 246-255, 362-364, 563-565          |
| <b>Data items</b>                         | 12  | List and define all variables for which data will be sought (e.g., PICO items, funding sources), any pre-planned data assumptions and simplifications                                                                                       | <input checked="" type="checkbox"/> | <input type="checkbox"/>            | 289-292, 362-364                   |
| <b>Outcomes and prioritization</b>        | 13  | List and define all outcomes for which data will be sought, including prioritization of main and additional outcomes, with rationale                                                                                                        | <input checked="" type="checkbox"/> | <input type="checkbox"/>            | 126-139, 172-178, table 2          |
| <b>Risk of bias in individual studies</b> | 14  | Describe anticipated methods for assessing risk of bias of individual studies, including whether this will be done at the outcome or study level, or both; state how this information will be used in data synthesis                        | <input checked="" type="checkbox"/> | <input type="checkbox"/>            | 268-286, 365-370                   |
| <b>DATA</b>                               |     |                                                                                                                                                                                                                                             |                                     |                                     |                                    |
| <b>Synthesis</b>                          | 15a | Describe criteria under which study data will be quantitatively synthesized                                                                                                                                                                 | <input checked="" type="checkbox"/> | <input type="checkbox"/>            | 294-300                            |
|                                           | 15b | If data are appropriate for quantitative synthesis, describe planned summary measures, methods of handling data, and methods of combining data from studies, including any planned exploration of consistency (e.g., $I^2$ , Kendall's tau) | <input checked="" type="checkbox"/> | <input type="checkbox"/>            | 301-328, 347-348, 349-359          |
|                                           | 15c | Describe any proposed additional analyses (e.g., sensitivity or subgroup analyses, meta-regression)                                                                                                                                         | <input checked="" type="checkbox"/> | <input type="checkbox"/>            | 329-346, 353-359                   |
|                                           | 15d | If quantitative synthesis is not appropriate, describe the type of summary planned                                                                                                                                                          | <input type="checkbox"/>            | <input checked="" type="checkbox"/> | n.a.<br>(quantitative)             |

1  
2  
3  
4  
5  
6  
7  
8  
9  
10  
11  
12  
13  
14  
15  
16  
17  
18  
19  
20  
21  
22  
23  
24  
25  
26  
27  
28  
29  
30  
31  
32  
33  
34  
35  
36  
37  
38  
39  
40  
41  
42  
43  
44  
45  
46

| Section/topic                            | #  | Checklist item                                                                                                              | Information reported                |                          | Line number(s)               |
|------------------------------------------|----|-----------------------------------------------------------------------------------------------------------------------------|-------------------------------------|--------------------------|------------------------------|
|                                          |    |                                                                                                                             | Yes                                 | No                       |                              |
|                                          |    |                                                                                                                             |                                     |                          | synthesis will be performed) |
| <b>Meta-bias(es)</b>                     | 16 | Specify any planned assessment of meta-bias(es) (e.g., publication bias across studies, selective reporting within studies) | <input checked="" type="checkbox"/> | <input type="checkbox"/> | 360-361, 402-406             |
| <b>Confidence in cumulative evidence</b> | 17 | Describe how the strength of the body of evidence will be assessed (e.g., GRADE)                                            | <input checked="" type="checkbox"/> | <input type="checkbox"/> | 365-370                      |

For peer review only

# BMJ Open

## **Efficacy of Vitamin D3 supplementation on cancer mortality in the general population and the prognosis of cancer patients: Protocol of a systematic review and individual patient data meta-analysis of randomized controlled trials**

|                                 |                                                                                                                                                                                                                                                                                                                                                                                                                                           |
|---------------------------------|-------------------------------------------------------------------------------------------------------------------------------------------------------------------------------------------------------------------------------------------------------------------------------------------------------------------------------------------------------------------------------------------------------------------------------------------|
| Journal:                        | <i>BMJ Open</i>                                                                                                                                                                                                                                                                                                                                                                                                                           |
| Manuscript ID                   | bmjopen-2020-041607.R1                                                                                                                                                                                                                                                                                                                                                                                                                    |
| Article Type:                   | Protocol                                                                                                                                                                                                                                                                                                                                                                                                                                  |
| Date Submitted by the Author:   | 17-Oct-2020                                                                                                                                                                                                                                                                                                                                                                                                                               |
| Complete List of Authors:       | Schöttker, Ben; German Cancer Research Centre, Division of Clinical Epidemiology and Aging Research; University of Heidelberg, Network Aging Research<br>Kuznia, Sabine; German Cancer Research Centre, Division of Clinical Epidemiology and Aging Research<br>Brenner, Hermann; German Cancer Research Centre, Division of Clinical Epidemiology and Aging Research; National Center of Tumor Diseases, Division of Preventive Oncology |
| <b>Primary Subject Heading</b>: | Patient-centred medicine                                                                                                                                                                                                                                                                                                                                                                                                                  |
| Secondary Subject Heading:      | Public health                                                                                                                                                                                                                                                                                                                                                                                                                             |
| Keywords:                       | Nutritional support < ONCOLOGY, ONCOLOGY, NUTRITION & DIETETICS, PUBLIC HEALTH, Protocols & guidelines < HEALTH SERVICES ADMINISTRATION & MANAGEMENT, Epidemiology < ONCOLOGY                                                                                                                                                                                                                                                             |
|                                 |                                                                                                                                                                                                                                                                                                                                                                                                                                           |

SCHOLARONE™  
Manuscripts



I, the Submitting Author has the right to grant and does grant on behalf of all authors of the Work (as defined in the below author licence), an exclusive licence and/or a non-exclusive licence for contributions from authors who are: i) UK Crown employees; ii) where BMJ has agreed a CC-BY licence shall apply, and/or iii) in accordance with the terms applicable for US Federal Government officers or employees acting as part of their official duties; on a worldwide, perpetual, irrevocable, royalty-free basis to BMJ Publishing Group Ltd ("BMJ") its licensees and where the relevant Journal is co-owned by BMJ to the co-owners of the Journal, to publish the Work in this journal and any other BMJ products and to exploit all rights, as set out in our [licence](#).

The Submitting Author accepts and understands that any supply made under these terms is made by BMJ to the Submitting Author unless you are acting as an employee on behalf of your employer or a postgraduate student of an affiliated institution which is paying any applicable article publishing charge ("APC") for Open Access articles. Where the Submitting Author wishes to make the Work available on an Open Access basis (and intends to pay the relevant APC), the terms of reuse of such Open Access shall be governed by a Creative Commons licence – details of these licences and which [Creative Commons](#) licence will apply to this Work are set out in our licence referred to above.

Other than as permitted in any relevant BMJ Author's Self Archiving Policies, I confirm this Work has not been accepted for publication elsewhere, is not being considered for publication elsewhere and does not duplicate material already published. I confirm all authors consent to publication of this Work and authorise the granting of this licence.

1  
2  
3 1 **Efficacy of Vitamin D<sub>3</sub> supplementation on cancer mortality in the**  
4  
5 2 **general population and the prognosis of cancer patients: Protocol of a**  
6  
7 3 **systematic review and individual patient data meta-analysis of**  
8  
9 4 **randomized controlled trials**  
10  
11 5

12 6 Ben Schöttker<sup>1,2\*</sup>, Sabine Kuznia<sup>1\*</sup>, Hermann Brenner<sup>1-4</sup>  
13 7

14  
15 8 <sup>1</sup> Division of Clinical Epidemiology and Aging Research, German Cancer Research Center (DKFZ),  
16 9 Im Neuenheimer Feld 581, 69120 Heidelberg, Germany  
17

18 10 <sup>2</sup> Network Aging Research (NAR), University of Heidelberg, Bergheimer Straße 20, 69115  
19 11 Heidelberg, Germany  
20

21 12 <sup>3</sup> Division of Preventive Oncology, German Cancer Research Center (DKFZ) and National Center  
22 13 for Tumor Diseases (NCT), Im Neuenheimer Feld 460, 69120 Heidelberg, Germany  
23

24 14 <sup>4</sup> German Cancer Consortium (DKTK), German Cancer Research Center (DKFZ), Im Neuenheimer  
25 15 Feld 280, 69120 Heidelberg, Germany  
26  
27 16  
28 17  
29  
30 18

31 19 \* Ben Schöttker and Sabine Kuznia share the first authorship and contributed equally to the  
32 20 preparation of the manuscript.  
33  
34  
35 21

36 22 **Corresponding author:**

37 23 Ben Schöttker,  
38 24 Division of Clinical Epidemiology and Aging Research,  
39 25 German Cancer Research Center (DKFZ),  
40 26 Im Neuenheimer Feld 581,  
41 27 69120 Heidelberg, Germany,  
42 28 Phone: +49 6221 42 1355,  
43 29 E-Mail: b.schoettker@dkfz.de  
44  
45  
46  
47  
48  
49  
50 30  
51

52 31 **E-Mails:**

53 32 Ben Schöttker - b.schoettker@dkfz.de  
54 33 Sabine Kuznia – s.kuznia@dkfz.de  
55 34 Hermann Brenner - h.brenner@dkfz.de  
56  
57  
58  
59 35

60 36 Word Count (excluding title page, abstract, references, figures, and tables): 4,350

## 37 **ABSTRACT**

### 38 **Introduction**

39 Vitamin D insufficiency is much more common among cancer patients than the general population.  
40 Previous meta-analyses of controlled trials showed an approximately 15% reduction of cancer  
41 mortality by vitamin D supplementation compared to placebo or no treatment in the general  
42 population.

43 On top of updating the latest systematic review on vitamin D supplementation and cancer mortality  
44 in the general population, we aim to conduct the first meta-analyses of trials on vitamin D<sub>3</sub>  
45 supplementation and cancer-specific and overall survival of cancer patients. Besides, we will conduct  
46 for the first time subgroup analyses based on individual patient data collected from randomized  
47 controlled trials.

### 48 **Methods and analysis**

49 A systematic review and individual patient data meta-analysis will be performed on randomized  
50 placebo-controlled trials with a vitamin D<sub>3</sub> intervention. The addressed outcomes are cancer mortality  
51 in the general population as well as cancer-specific and overall survival of cancer patients. The  
52 quality appraisal of the studies will be evaluated by the Cochrane risk-of-bias tool for randomized  
53 trials. Trial results will be re-analyzed using adjusted and unadjusted Cox proportional hazard  
54 regression models and meta-analyses are planned. Cochran's Q-Test and the I<sup>2</sup> index will be used  
55 to statistically assess the level of heterogeneity, while sensitivity and subgroup analyses serve to  
56 identify potential causes of heterogeneity. Subgroup analyses will be conducted for vitamin D<sub>3</sub>  
57 dosing, follow-up time, age, sex, obesity, vitamin D deficiency/insufficiency, history of cancer, and  
58 compliance. Publication bias will be assessed by funnel plots and Egger's test.

1  
2 **59 Ethics and dissemination**  
3  
4

5 60 Ethical approval is not required since no human beings are involved in this systematic review.  
6

7 61 Results will be published in a peer-reviewed journal with open access. They will be presented at  
8  
9 62 conferences and sent to patient advocacy groups and German oncologic rehabilitation centers.  
10  
11

12 **63 PROSPERO registration number**  
13  
14

15 64 CRD42020185566  
16  
17

18 **65 Keywords**  
19  
20

21 66 Vitamin D, cancer, mortality, systematic review, meta-analysis  
22  
23

24 67  
25  
26

27 **68 Strengths and limitations of this study**  
28  
29

30 69 • First meta-analysis on vitamin D<sub>3</sub> supplementation and cancer survival as well as first individual  
31  
32 70 patient data meta-analysis on this research topic.  
33  
34

35 71 • Results of subgroup analyses based on individual patient data allow fundamental insights for  
36  
37 72 personalized medicine and may be used as guidance for future clinical trials targeting cancer  
38  
39 73 patients that presumably profit most from vitamin D supplementation  
40  
41

42 74 • Conduction of the systematic review according to this protocol and a thorough assessment of  
43  
44 75 study quality, sources of heterogeneity, and bias in meta-analyses minimize the risk of bias and will  
45  
46 76 gather reproducible results.  
47  
48

49  
50 77 • Number of studies with eligible data for subgroup analyses may be limited.  
51  
52  
53  
54  
55  
56  
57  
58  
59  
60



## 78 INTRODUCTION

### 79 Background

80 The global cancer burden is estimated to have risen to 18.1 million new cases and 9.6 million deaths  
81 in 2018.(1) There is accumulating evidence from epidemiological studies that a low vitamin D status  
82 goes along with increased risks of several types of cancer. Meta-analyses of observational studies  
83 reported increased risks of lung cancer, colorectal cancer, breast cancer, bladder carcinoma, and  
84 lymphoma in subjects with low 25(OH)D serum concentrations.(2-5) Furthermore, epidemiological  
85 studies have shown that low serum levels of 25-hydroxyvitamin D (25(OH)D), the acknowledged  
86 best biomarker to measure vitamin D status, were strongly associated with substantially increased  
87 cancer mortality.(6) For example, in a German population-based cohort study of older adults, the  
88 risk to die of cancer was increased by 42% in study participants with vitamin D deficiency (defined  
89 as 25(OH)D < 30 nmol/L) compared to individuals with sufficient 25(OH)D levels > 50 nmol/L (hazard  
90 ratio [HR] and 95% confidence interval (95%CI): 1.42 [1.08; 1.87]).(7)

91 The molecular links between vitamin D and carcinogenesis and progression have been previously  
92 described.(8) In brief, genomic mechanisms of the active hormone 1,25(OH)<sub>2</sub>D impact signaling  
93 pathways that regulate cell proliferation, differentiation, and cell survival. 1,25(OH)<sub>2</sub>D may primarily  
94 act as an anti-proliferative agent in many tissues and may slow down malignant cellular growth.  
95 Thus, there is biological plausibility that a sufficient vitamin D supply is especially essential for a  
96 good cancer prognosis. A causal relationship of low 25(OH)D levels and cancer mortality was  
97 furthermore supported by a Mendelian randomization study conducted within three large cohorts  
98 from Denmark.(9)

99 Several randomized trials with vitamin D supplementation have been conducted with mostly the aim  
100 to improve skeletal outcomes at older ages. Cancer mortality was a secondary outcome in all trials  
101 and therefore the trials were not specifically designed for this outcome.(10) Despite strong  
102 heterogeneity in study populations, intervention schemes, and other important design aspects, three  
103 out of four meta-analyses demonstrated a statistically significant reduction in cancer mortality.(11-  
104 15)

1  
2 105 However, most trials have not been restricted to patients that were vitamin D deficient.(10) The latter  
3  
4 106 is important because the association of 25(OH)D levels and adverse health outcomes is not linear.(6)  
5  
6 107 Neglecting this dose-response relationship by treating subjects without hypovitaminosis D is  
7  
8 108 expected to have led to a substantial underestimation of the potential efficacy of vitamin D  
9  
10 109 supplementation in previous clinical trials.(16) Therefore, there is a need for a systematic review that  
11  
12 110 re-analyses individual patient data (IPD) from previous trials restricted to subjects with vitamin D  
13  
14 111 insufficiency (25(OH)D < 50 nmol/L) or deficiency (25(OH)D < 30 nmol/L).  
15  
16

17  
18 112 Another important reason to re-analyze the previous trial data is that most studies were not restricted  
19  
20 113 to cancer patients. Vitamin D deficiency or insufficiency are much more common among cancer  
21  
22 114 patients than among the general population. In a study with 2,912 colorectal cancer patients, vitamin  
23  
24 115 D deficiency (25(OH)D levels < 30 nmol/L) was found among 59% of colorectal cancer patients  
25  
26 116 during or shortly after first-line treatment, and, in agreement with previous evidence, low 25(OH)D  
27  
28 117 levels were strongly associated with poorer survival.(17, 18) Systematic reviews of observational  
29  
30 118 studies on 25(OH)D levels and cancer prognosis concluded that sufficient 25(OH)D levels are  
31  
32 119 associated with a better prognosis of breast and colorectal cancer, whereas there are too few studies  
33  
34 120 for other cancer sites up to date to draw conclusions.(17, 19)  
35  
36

37  
38 121 Further important potential effect modifiers that deserve close investigation are obesity and  
39  
40 122 compliance. People with low compliance and/or obesity, who may need higher vitamin D doses  
41  
42 123 because vitamin D is stored in adipocytes, might have attenuated the overall treatment effect in the  
43  
44 124 trials.(20)  
45  
46

## 50 126 **Objective**

51  
52

53 127 The objective of our systematic review is to assess the efficacy of vitamin D<sub>3</sub> supplementation on  
54  
55 128 cancer mortality in the general population and the prognosis of cancer patients with special attention  
56  
57 129 to potential effect modifiers, including baseline 25(OH)D levels, cancer at baseline, BMI and  
58  
59 130 compliance.  
60

1  
2 131 The main outcomes include “cancer mortality in the general population”, “cancer-specific survival of  
3  
4 132 cancer patients” and “overall survival of cancer patients”. These outcomes are universally used in  
5  
6 133 cancer studies and do not need further refinement during the review.  
7  
8

9 134 In a first step, we intend to update the previous systematic reviews on vitamin D supplementation  
10  
11 135 and cancer mortality in the general population by including newly published trials and unpublished  
12  
13 136 data from trials with outcome data on cancer incidence or all-cause mortality by asking the authors  
14  
15 137 for data on cancer mortality. Second, we will obtain data for an IPD meta-analysis. Third, we will  
16  
17  
18 138 conduct IPD meta-analyses on vitamin D<sub>3</sub> supplementation and overall and cancer-specific survival  
19  
20 139 among cancer patients. Forth, we will conduct subgroup analyses to explore sources of  
21  
22 140 heterogeneity and to identify effect modifiers. The timetable for the review is shown in Table 1.  
23  
24

25 141 **Table 1:** Proposed timetable for conducting the review  
26

| Step                                                  | Timeframe for completion |
|-------------------------------------------------------|--------------------------|
| Literature search, abstract and full-text selection   | 2.5 months               |
| Data extraction & individual patient data acquisition | 2.5 months               |
| Quality appraisal                                     | 2 months                 |
| Data analysis & meta-analysis                         | 3 months                 |
| Writing of manuscript                                 | 2 months                 |
| <b>Total</b>                                          | <b>12 months</b>         |

27  
28  
29  
30  
31  
32  
33  
34  
35  
36  
37  
38  
39 142  
40  
41

## 42 143 **METHODS AND ANALYSIS**

### 43 44 45 144 **Study selection criteria/ Eligibility criteria**

46  
47  
48  
49 145 We will follow a two-step approach for the study selection: First, all trials will be selected that could  
50  
51 146 potentially have published or unpublished data on the research topic. All authors of trials with  
52  
53 147 potentially unpublished data on cancer mortality/survival will be contacted to provide data. In the  
54  
55 148 second step, only trials with eligible data for a meta-analysis will be included.  
56  
57  
58  
59  
60

## **Step 1: Inclusion criteria for trials**

**Participants:** We will include studies investigating the adult population (18 years or older). We will also include studies conducted solely with cancer populations or patients with other conditions (e.g. studies that recruited only patients with type 2 diabetes).

**Interventions:** We will focus on trials that used vitamin D<sub>3</sub> in any dose and any regimen (e.g. daily/weekly/monthly intake) as the intervention. However, the minimum time of the intervention shall be six months to exclude studies with one-time bolus interventions or very short intervention periods. The first reason is that cancer mortality is highly unlikely to be influenced by very brief intervention periods. The second reason is that after initiating daily, weekly, or monthly supplementation schedules, it takes three to six months for 25(OH)D levels to reach homeostasis.

Besides, we will also include studies using vitamin D<sub>3</sub> bioequivalent substances such as calcitriol, being the active vitamin D hormone 1,25(OH)<sub>2</sub>D, as well as alfacalcidol and calcifediol, which are both equally metabolized to 1,25(OH)<sub>2</sub>D.

We will exclude studies with vitamin D<sub>2</sub> supplementation since the Cochrane review of Bjelakovic et al. and other recent data showed clearly no efficacy on mortality.(10, 11, 15, 21) Co-supplementation with calcium or other dietary supplements in the intervention arm will not be an exclusion criterion. A sensitivity analysis will elucidate whether the inclusion of these studies had an impact on the overall effect estimate of the meta-analysis.

**Comparators:** We will include only studies, which used placebo as the comparator.

**Outcomes:** To be eligible for inclusion in a meta-analysis trials need to have assessed the outcome of cancer mortality, cancer survival, or cancer-specific survival. In an intermediate step of the systematic review, we will also record studies with the outcomes of cancer incidence or all-cause mortality and contact the authors if they have data for the outcomes needed for the planned meta-analyses. The definitions of all outcomes are shown in Table 2.

**Table 2:** Definition of outcomes

| Outcome                  | Definition                                                                                                                                  |
|--------------------------|---------------------------------------------------------------------------------------------------------------------------------------------|
| All-cause mortality      | Rate of deaths during a specific time period in population at risk                                                                          |
| Cancer mortality         | Rate of cancer deaths during a specific time period in population at risk                                                                   |
| Cancer incidence         | Rate of newly diagnosed cancer cases during a specific time period in population at risk                                                    |
| Overall cancer survival  | Proportion of patients from a cancer population at risk alive at some point subsequent to the diagnosis of their cancer                     |
| Cancer-specific survival | Proportion of patients from a cancer population at risk who did not die of cancer at some point subsequent to the diagnosis of their cancer |

174

Study design: We will include RCTs in which, analogous to the intervention period, the follow-up period is at least six months. The follow-up time should not be longer than the time under treatment. We will focus on parallel-group designs and exclude single-arm studies. We will further exclude all types of cohort studies and case-control studies as well as the following types of records: reviews, dissertations, theses, editorials, study protocol, clinical guidelines, commentaries, and letters.

Setting: There will be no restrictions by type of setting.

Minimum sample size: The studies need to have at least one cancer death in the verum and placebo group.

Geographical location: No restrictions are defined regarding the geographical location.

## **Step 2: Inclusion criteria for pooling in meta-analysis**

Studies will be included for pooling in the meta-analysis, if the risk ratio and 95% confidence interval for at least one outcome of interest (cancer mortality in the general population, cancer-specific survival of cancer patients, or overall survival of cancer patients) were either reported in the publication or could be obtained from authors or individual participant data. In the case of double publication from the same trial, only the publication with the largest amount of information, e.g. the longest follow-up, will be included in the meta-analysis.

## 192 Information sources and search strategy

193 The search strategy will be elaborated by SK, BS, and A Heppert. Mrs. Heppert is a specialist for  
194 systematic bibliographic searches at the Central Library of the German Cancer Research Center  
195 and is not otherwise associated with the project. Finally, it will be peer-reviewed by HB and carried  
196 out by SK.

197 The bibliographic databases MEDLINE (Pubmed interface), ISI Web of Science (WoS; Clarivate  
198 Analytics interface), and the Cochrane Central Register of Controlled Trials (CENTRAL; OVID  
199 interface) will be searched systematically. We will also carry out a systematic search for previous  
200 systematic reviews in the Cochrane Database of Systematic Reviews (CDRS, OVID interface) and  
201 KSR Evidence (<https://ksevidence.com>), which are both specialized search engines for systematic  
202 reviews. RCTs included in meta-analyses on the topics vitamin D supplementation and cancer  
203 mortality, cancer incidence, all-cause mortality, or cancer survival will be extracted and merged with  
204 the hits found in the bibliographic database search. The electronic database search will be  
205 complemented by searching the WHO's International Clinical Trials Research Portal (ICTRP) and  
206 [clinicaltrials.gov](http://clinicaltrials.gov) to capture results from ongoing or recently completed RCTs that have not been  
207 published in scientific journals, yet. We will also scan the reference lists of eligible studies to yield  
208 additional trial articles via cross-referencing. A draft of the search strategy is presented in Figure 1.

209 We will search in MEDLINE, ISI WoS, and CENTRAL for medical subject headings (MeSH), free text  
210 words, synonyms, and related search terms for the concepts "vitamin D", "mortality", "cancer",  
211 "randomized controlled trial" and "placebo". Besides, standard search terms for RCTs will be used  
212 additionally wherever available. No restrictions are planned in the search strategy to prevent  
213 overlooking important studies that have not been correctly classified in the respective bibliographic  
214 databases. All databases will be searched from inception dates. Moreover, we will not limit the  
215 search to studies in English as relevant studies might also be published in other languages. The  
216 search string for MEDLINE is shown in Table 3.

1  
2 217 **Table 3:** Search string for MEDLINE

| Step | Search string                                                                                                                                                                                                                                                                                                                                                                                                                                                   |
|------|-----------------------------------------------------------------------------------------------------------------------------------------------------------------------------------------------------------------------------------------------------------------------------------------------------------------------------------------------------------------------------------------------------------------------------------------------------------------|
| 1    | "vitamin d"[tw] OR "vitamin D"[MeSH] OR cholecalciferol[MeSH] OR cholecalciferol*[tw] OR calciol[tw] OR hydroxycholecalciferols[MeSH] OR hydroxycholecalciferol*[tw] OR dihydroxycholecalciferol*[tw] OR "vitamin d3"[tw] OR "vitamin d 3"[tw] OR calcitriol[MeSH] OR calcitriol[tw] OR "1-hydroxycholecalciferol"[tw] OR calcifediol[MeSH] OR calcifediol[tw] OR calcidiol[tw] OR alfacalcidol[Supplementary Concept] OR alphacalcidol[tw] OR alfacalcidol[tw] |
| 2    | mortality[tw] OR mortality[MeSH] OR death[MeSH] OR death[tw] OR died[tw] OR dead[tw] OR survival[tw] OR surviv*[tw] OR survival[MeSH]                                                                                                                                                                                                                                                                                                                           |
| 3    | neoplasms[MeSH] OR neoplas*[tw] OR malignanc*[tw] OR cancer*[tw] OR tumor*[tw] OR tumour*[tw] OR carcinoma*[tw]                                                                                                                                                                                                                                                                                                                                                 |
| 4    | (((((("randomized controlled trial"[pt]) OR "controlled clinical trial"[pt]) OR randomized[tiab]) OR placebo[tiab]) OR "drug therapy"[sh]) OR randomly[tiab]) OR trial[tiab]) OR groups[tiab])) NOT ((animals[mh] NOT humans[mh]))                                                                                                                                                                                                                              |
| 5    | placebos[MeSH] OR placebo[tw]                                                                                                                                                                                                                                                                                                                                                                                                                                   |
| 6    | 2 OR 3                                                                                                                                                                                                                                                                                                                                                                                                                                                          |
| 7    | 1 AND 4 AND 5 AND 6                                                                                                                                                                                                                                                                                                                                                                                                                                             |

25 218

26  
27  
28 219 A shortened version of the MEDLINE search string will be used to search for systematic reviews in  
29  
30 220 CDSR and KSR Evidence. Only the first three search steps are needed because the study design is  
31  
32 221 "systematic review" and not "placebo-controlled RCT". The search string for CDSR is shown in Table  
33  
34 222 4. The literature search will be updated during the peer-review process of the publication in order to  
35  
36  
37 223 include the most up to date literature.

38  
39  
40 224 **Table 4:** Search string for the Cochrane Database of Systematic Reviews

| Step | Search string                                                                                                                                                                                                                                                                                                                                                                                                                                                                                                                                                                                                                                                                                                                                                                                                |
|------|--------------------------------------------------------------------------------------------------------------------------------------------------------------------------------------------------------------------------------------------------------------------------------------------------------------------------------------------------------------------------------------------------------------------------------------------------------------------------------------------------------------------------------------------------------------------------------------------------------------------------------------------------------------------------------------------------------------------------------------------------------------------------------------------------------------|
| 1    | <p>#1 MeSH descriptor: [Vitamin D] explode all trees</p> <p>#2 MeSH descriptor: [Cholecalciferol] explode all trees</p> <p>#3 MeSH descriptor: [Calcifediol] explode all trees</p> <p>#4 MeSH descriptor: [Calcitriol] explode all trees</p> <p>#5 MeSH descriptor: [Hydroxycholecalciferols] explode all trees</p> <p>#6 (("alfacalcidol") OR ("alphacalcidol") OR ("hydroxycholecalciferol*") OR ("1- hydroxycholecalciferol") OR ("hydroxyvitamin* D") OR ("calcifediol") OR ("calcidiol") OR ("calcitriol") OR ("dihydroxycholecalciferol*") OR ("dihydroxyvitamin d*") OR ("vitamin D") OR (cholecalciferol*) OR ("vitamin D3") OR ("vitamin D 3") OR ("calciol")) (Word variations have been searched)</p> <p>#7 ("vitamin d*"):ti,ab,kw (Word variations have been searched)</p> <p>#8 {OR #1-#7}</p> |
| 2    | <p>#9 MeSH descriptor: [Mortality] explode all trees</p> <p>#10 MeSH descriptor: [Death] explode all trees</p> <p>#11 MeSH descriptor: [Survival] explode all trees</p>                                                                                                                                                                                                                                                                                                                                                                                                                                                                                                                                                                                                                                      |

60

|   |     |                                                                                                             |
|---|-----|-------------------------------------------------------------------------------------------------------------|
|   | #12 | ("mortality" OR "dea*" OR "died" OR "survival" OR "surviv*") (Word variations have been searched)           |
|   | #13 | {OR #9-#12}                                                                                                 |
| 3 | #14 | MeSH descriptor: [Neoplasms] explode all trees                                                              |
|   | #15 | (carcinoma* OR tumour* OR tumor* OR cancer* OR malignanc* OR neoplas*) (Word variations have been searched) |
|   | #16 | #14 OR #15                                                                                                  |
| 4 | #17 | #13 OR #16                                                                                                  |
| 5 | #18 | #8 AND #17 in Cochrane Reviews (Word variations have been searched)                                         |

## Data collection and management

Study selection and data extraction will be performed in duplicate by two reviewers. Both are blinded to each other's decision but not to journal titles, study authors, or institutions. The screening will be conducted by entering data into blank Microsoft Word or Excel spreadsheets. The software EndNote will be used to store, organize, and manage all the references and allow a transparent and reproducible systematic search. To assure validity and high quality of the data, the data extraction will be performed by using standard and predefined data extraction forms (see Appendix 1). Both reviewers will scan independently the titles and abstracts of studies obtained by the aforementioned search strategy against the eligibility criteria. For those studies that meet the inclusion criteria or that cannot yet be fully excluded, full-text reports will be acquired and screened again towards the inclusion criteria. In the next step, the results of both reviewers will be compared and in cases of disagreement, critical points will be discussed until a consensus is reached. If necessary, we will contact study authors to resolve questions about eligibility. We will document the reasons for excluding trials.

After completing the abstract and full-text selection with eligible studies, the two reviewers will extract independently the pre-defined data (see Appendix 1). Extracted items will include first author, publication year, country, number of participants, general population or medical condition (including cancer site and stage(s)), sex, mean/median age, race/ethnicity/skin color, mean/median BMI, mean/median 25(OH)D levels at baseline, vitamin D<sub>3</sub> dosing regimen, duration of vitamin D<sub>3</sub>



1  
2 246 supplementation, compliance, mean/median and maximum follow-up time, number of cancer deaths  
3  
4 247 and effect estimates (including confidence intervals) reported for cancer mortality/cancer survival.  
5  
6 248 Individual patient data for the aforementioned variables will be obtained from all trials with at least  
7  
8 249 20 cancer deaths (see Appendix 1). If summary data are not published, they shall be calculated from  
9  
10 250 the obtained data. All authors will be contacted by e-mail with a maximum of three attempts sent with  
11  
12 251 two weeks apart.

14  
15  
16 252 For the meta-analyses on cancer survival and cancer-specific survival, we will ask all authors who  
17  
18 253 conducted trials in the general population to provide IPD for cancer diagnoses in the five years prior  
19  
20 254 to baseline and during the trial (including cancer site with ICD-code, stage, and diagnosis date). The  
21  
22 255 following IPD will be additionally collected: age, sex, BMI, race/ethnicity/skin color, baseline 25(OH)D  
23  
24 256 levels, compliance, randomization group allocation, baseline date, deaths during follow-up with date,  
25  
26 257 cancer deaths with date, censoring dates for survival outcomes, and censoring date for patients not  
27  
28 258 dying of cancer (see Appendix 1). If IPD cannot be shared, the authors of the studies will be asked  
29  
30 259 to conduct the analyses in-house and to provide the summary estimates for the meta-analysis. If trial  
31  
32 260 authors do not collaborate, their study cannot be included in subgroup analyses for which no effect  
33  
34 261 estimates were published but the result from the total trial population will remain included in the main  
35  
36 262 meta-analysis.

38  
39  
40 263

## 41 42 43 264 **Quality assessment**

44  
45  
46 265 The protocol of the systematic review with all planned statistical analyses has been registered in  
47  
48 266 PROSPERO before data collection to preclude data-driven analyses and selective reporting of only  
49  
50 267 statistically significant findings. The study protocol has been developed in line with the “Preferred  
51  
52 268 reporting items for systematic review and meta-analysis protocols” (PRISMA-P, see Appendix 2),  
53  
54 269 the Cochrane Handbook for Systematic Reviews of Interventions as well as the Institute of Medicine  
55  
56 270 guideline.(22-25) We will ensure to fulfill all requirements recommended by the current PRISMA  
57  
58 271 guideline when writing the publication of the systematic review.(26, 27)  
59  
60

1  
2 272 The Cochrane risk-of-bias tool for randomized trials (RoB 2) will be used to assess various domains  
3  
4 273 of bias including aspects of trial design, conduct, and reporting (see Appendix 1).(28, 29) The  
5  
6 274 following domains will be covered during the evaluation: sequence generation, allocation  
7  
8 275 concealment, blinding, incomplete outcome data (e.g. withdrawals and dropouts), and selective  
9  
10 276 outcome reporting. A summary assessment will be made based on the extracted items, judging  
11  
12 277 whether the risk of bias in the respective study is low, high, or has some concerns. If only insufficient  
13  
14 278 data is reported, the risk of bias is “unclear” and the original study authors will be contacted for further  
15  
16 279 information. The assessment will be conducted by two independent reviewers using the RoB 2  
17  
18 280 tool.(28, 29) In cases of disagreement, critical points will be discussed until a consensus is reached.  
19  
20  
21 281 The risk of bias evaluation will be incorporated into the data synthesis by performing a sensitivity  
22  
23 282 analysis that excludes studies with high or unknown risk of bias.  
24

## 25 283 26 27 284 **Descriptive analysis and meta-analysis**

### 28 29 285 Measures of treatment effect

30  
31 286 The mortality/survival outcomes shall be addressed by estimating hazard ratios (HR) and 95%  
32  
33 287 confidence intervals (95%CI). Results of the intention-to-treat (ITT) approach will be used, including  
34  
35 288 all patients randomized when both ITT and per-protocol results are given.  
36  
37

### 38 39 289 Data synthesis

40  
41  
42 290 As far as study quality and differences between studies allow, effect estimates of all eligible studies  
43  
44 291 with data for the following three main meta-analyses will be pooled deriving random effects results  
45  
46 292 with the DerSimonian and Laird method (primary analysis) and fixed effects summary estimates  
47  
48 293 using the Mantel-Haenzel method (secondary analysis).  
49

- 50 294 1) Association of vitamin D<sub>3</sub> supplementation and cancer mortality in the general population
- 51  
52 295 2) Association of vitamin D<sub>3</sub> supplementation and cancer-specific survival of cancer patients
- 53  
54 296 3) Association of vitamin D<sub>3</sub> supplementation and overall survival of cancer patients
- 55

56  
57 297 For all studies that provide IPD, unadjusted Cox proportional hazard regression models will be used  
58  
59 298 to estimate HRs and 95%CIs for the main meta-analyses in which we will pool effect size data from  
60  
299 studies who do and who do not provide IPD in a two-step approach. For studies that cannot send

1  
2 300 IPD to the coordinating center (German Cancer Research Center, Heidelberg), authors are being  
3  
4 301 asked to estimate the HRs and 95% CIs themselves and send the summary data for the meta-  
5  
6 302 analyses. To assess cancer survival as time-to-event data from general population cohorts, the study  
7  
8 303 will be restricted to patients with a history of cancer in the five years preceding baseline or a cancer  
9  
10 304 diagnosis during the trial. For the former, the survival time will be calculated from baseline to  
11  
12 305 death/end of the trial, and for the latter, survival time will be counted from the date of cancer diagnosis  
13  
14 306 till death/end of the trial.  
15  
16

17  
18 307 With all studies that agree to send IPD data to the coordinating center or to do additional analyses  
19  
20 308 in-house, we will also conduct an additional multivariate Cox proportional hazards regression model.  
21  
22 309 The model for the outcome cancer mortality among general population studies will contain the  
23  
24 310 variables vitamin D<sub>3</sub> intervention (vs. placebo), age (continuous; < 70 vs. ≥ 70 years), sex (male,  
25  
26 311 female, unknown), BMI (< 25 vs. 25 – 29.9 vs. ≥ 30 kg/m<sup>2</sup> vs. unknown), skin color (white vs.  
27  
28 312 black/brown vs. other), 25(OH)D baseline level (< 30 vs. 30 – 49.9 nmol/L vs. ≥ 50 nmol/L vs.  
29  
30 313 unknown), diagnosis of cancer (except non-melanoma skin cancer and benign tumors) in five years  
31  
32 314 before baseline (yes vs. no vs. unknown), health status (general healthy population vs. diseased  
33  
34 315 population), and compliance (< 80% vs. ≥ 80% vs. unknown). The models for the outcomes overall  
35  
36 316 and cancer-specific survival of cancer patients will be adjusted for the same variables but the variable  
37  
38 317 “diagnosis of cancer in five years before baseline” will be replaced by more specific variables for  
39  
40 318 cancer stage (only advanced stages III and/or IV vs. unknown), cancer site (prostate vs. colorectal  
41  
42 319 vs. breast vs. lung vs. other vs. unknown) and time since cancer diagnosis (<1 year vs. 1-5 years).  
43  
44 320 We will test for interactions of the treatment variable (vitamin D<sub>3</sub> vs. placebo) with these covariates  
45  
46 321 to identify potential effect modifiers. Again, a two-step approach will be used for the meta-analyses,  
47  
48 322 whereby the analyses are carried out on a study-specific basis, and then the effect estimates are  
49  
50 323 pooled. To further explore the variation of the treatment effect by methodological or patient  
51  
52 324 characteristics differences of the studies, the following subgroup analyses will be performed with IPD  
53  
54 325 data and studies that published eligible data:  
55  
56

57  
58  
59 326 Subgroup analyses according to trial design  
60

- 1  
2 327 - Daily dose vs. weekly/monthly bolus dose vs. bolus dose at the beginning of the trial followed  
3  
4 328 by a daily dose  
5  
6 329 - Low vs. moderate vs. high vitamin D<sub>3</sub> dosing (< 1,000 IU vs. 1,000 – 2,000 IU vs. > 2,000 IU  
7  
8 330 per day or equivalent weekly or monthly taken dose)  
9  
10 331 - Vitamin D<sub>3</sub> supplementation duration (< 5 vs. ≥ 5 years)  
11  
12 332 - Health status (general population vs. diseased population)  
13  
14 333 - Region (North America vs. Europe vs. Other)  
15  
16

17  
18 334 Subgroup analyses according to patient characteristics

- 19  
20 335 - Age (< 70 vs. ≥ 70 years)  
21  
22 336 - Sex (male vs. female)  
23  
24 337 - Skin color (white vs. black/brown vs. other)  
25  
26 338 - BMI (< 25 vs. 25 – 29.9 vs. ≥ 30 kg/m<sup>2</sup>)  
27  
28 339 - Baseline 25(OH)D levels (< 30 vs. 30 – 49.9 nmol/L vs. ≥ 50 nmol/L)  
29  
30 340 - Compliance rate (< 80% vs. ≥ 80%)  
31  
32

33  
34 341 For meta-analyses conducted in cancer patients in addition:

- 35  
36 342 - Cancer stage (only advanced stages III and/or IV vs. unknown)  
37  
38 343 - Cancer site (prostate vs. colorectal vs. breast vs. lung vs. other)  
39  
40 344 - Time since cancer diagnosis (<1 year vs. 1-5 years)  
41

42  
43 345 Analyses in the coordinating center will be done with the statistical software SAS 9.4. The meta-  
44  
45 346 analyses will be performed with Comprehensive Meta-Analysis 2.0 (Biostat, Englewood, NJ).  
46

47  
48 347 Assessment of heterogeneity

49  
50  
51 348 Heterogeneity will be presented visually by forest plots and assessed statistically by Cochran's Q  
52  
53 349 test (significance level = 0.05) as well as the I<sup>2</sup> index (< 25% low, 25-50% moderate, > 50% high  
54  
55 350 heterogeneity). Meta-Analyses will be conducted even if high heterogeneity is being detected and  
56  
57 351 the results will be discussed taking the heterogeneity into consideration. Sources of heterogeneity  
58  
59  
60

1  
2 352 will be explored by the subgroup analyses outlined in the previous section and the following  
3  
4 353 sensitivity analyses:

- 6 354 - Excluding studies with a high or unknown risk of bias according to assessment with the  
7  
8 355 Cochrane risk-of-bias tool for randomized trials
- 10 356 - Excluding studies not reporting ITT results
- 12 357 - Excluding trials with co-supplementation of calcium
- 14 358 - Excluding events in the first year of follow-up

#### 17 18 359 Assessment of publication bias

20  
21 360 Publication bias will be assessed visually in funnel plots and tested for with Egger's test.

#### 23 24 361 Dealing with missing data

25  
26  
27 362 In case of missing data, we will seek contact with the original investigators. If possible, we will  
28  
29 363 calculate missing numerical data from the given reported data.

#### 31 32 364 Strength of the body of evidence

33  
34  
35 365 The quality of the evidence for each outcome will be evaluated using the Grading of  
36  
37 366 Recommendations Assessment, Development and Evaluation (GRADE) approach. The four levels  
38  
39 367 of evidence comprise very low, low, moderate, and high. Evidence from RCTs starts as high quality  
40  
41 368 but can be decreased for reasons such as the risk of bias, imprecision, inconsistency, indirectness,  
42  
43  
44 369 and publication bias.

#### 45 46 47 370 **Amendments**

48  
49  
50 371 In the case of protocol amendments, we will document the date, the description of the change, and  
51  
52 372 the rationale in a pre-defined log sheet in Microsoft Word or Excel.

53  
54  
55 373

56  
57  
58  
59  
60

## 374 Patient and public involvement

375 Patients and the public were not involved in the development of the study design. Since this is a  
376 protocol for a systematic review and no participant recruitment will take place, the involvement of  
377 patients in the recruitment, the conduct of the study and the dissemination of findings to study  
378 participants are not applicable.

## 380 Ethics and dissemination

381 An ethics approval is not required for this systematic review because it is only a summary of already  
382 published trial data. All studies to be included in the systematic review have their own ethics  
383 approvals, which are named in the original publications. For the IPD meta-analysis, we will take care  
384 that the additional analyses are in adherence with the ethics approvals of the trials.

385 The systematic review will be published in an international peer-reviewed journal for clinical oncology  
386 or general medicine with open access option and presented in national and international meetings.  
387 If the meta-analyses of the systematic review obtain statistically significant findings, we expect the  
388 result to be reflected in national and international guidelines and to change the current practice of  
389 tertiary prevention among cancer patients. Vitamin D<sub>3</sub> is already on the market in various doses and  
390 at low costs because it is not patented.

391 Patients will be informed via a press release from the German Cancer Research Center. Moreover,  
392 we will send a summary of the results in a language suitable for laypersons to all patient advocacy  
393 groups recommended by the Cancer Information Service of the German Cancer Research Center  
394 (up to data n = 30) for further dissemination among their members.(30) With respect to oncologists,  
395 we will disseminate the results to all German rehabilitation centers having a ward for oncologic  
396 rehabilitation, as listed in the register of the *Bundesarbeitsgemeinschaft für Rehabilitation e.V.*(31)  
397 As the topic of the review is in the field of tertiary prevention, oncologists in the rehabilitation setting  
398 are the target audience for information dissemination.

1  
2 399 **DISCUSSION**

3  
4  
5 400 One of the strengths of this systematic review comprises the first meta-analysis on vitamin D  
6  
7 401 supplementation and cancer survival and additionally the first IPD meta-analysis on this research  
8  
9 402 topic. The IPD meta-analysis will allow the investigation of potential effect modifiers. Especially  
10  
11 403 25(OH)D levels at baseline, BMI, and compliance are candidates that could have had a great impact  
12  
13 404 on the overall trial results.

15  
16 405 The creation of this research protocol prompted us to plan carefully all the details of the systematic  
17  
18 406 review and to anticipate and address potential problems before their actual occurrence. Arbitrary  
19  
20 407 decision making concerning any procedure of this systematic review is prevented, resulting again in  
21  
22 408 a decreased risk of publication bias and selective reporting bias. The protocol allows reproducible  
23  
24 409 and transparent research for future reviewers.

26  
27  
28 410 Possible limitations of our review include a potentially insufficient number of cancer deaths in the  
29  
30 411 studies and high heterogeneity, which could both negatively influence the statistical power of the  
31  
32 412 meta-analyses. However, it is still too early to judge whether these limitations occur.

34  
35 413 The quality of selected studies will be assessed and the quality of the evidence will be judged. The  
36  
37 414 ultimate goal is to ensure the reporting of highly meaningful findings for clinicians and patients.  
38  
39 415 Oncologists are well aware that vitamin D deficiency and insufficiency are very common in cancer  
40  
41 416 patients but there is uncertainty about whether and how they should routinely perform preventive  
42  
43 417 screening and treatments. In some clinics, cancer patients receive a uniform dose of vitamin D with  
44  
45 418 a “one-dose-fits-all” approach, which does not take individual 25(OH)D levels or other patient  
46  
47 419 characteristics into account. The optimal dose for one person may be utterly insufficient for another  
48  
49 420 one to achieve beneficial vitamin D levels. Since vitamin D products are readily available in  
50  
51 421 pharmacies or drug stores, many patients use low-dose vitamin D supplementation as self-  
52  
53 422 medication. Yet, it can be doubted whether this untargeted intervention has any effect on cancer  
54  
55 423 prognosis. Consequently, evidence-based recommendations for high-dose vitamin D  
56  
57 424 supplementation are highly relevant for both, clinicians and patients.

58  
59  
60

1  
2 425 If the planned systematic review determines the efficacy of vitamin D supplementation on cancer  
3  
4 426 prognosis in the expected magnitude of 10-15%, the review will be used to provide clear suggestions  
5  
6 427 on how vitamin D can be appropriately dosed to overcome vitamin D deficiency or insufficiency in  
7  
8 428 cancer patients.(12) Furthermore, our systematic review would provide the evidence for statutory  
9  
10 429 health insurances to cover the costs for screening for vitamin D deficiency or insufficiency in cancer  
11  
12 430 patients and a subsequent vitamin D supplementation. With expected relatively large effects and  
13  
14 431 very low screening and treatment costs (A vitamin D blood test costs approx. € 20, and one year of  
15  
16 432 vitamin D therapy costs less than € 100.), vitamin D supplementation will be highly cost-effective.  
17  
18  
19 433 The costs would be close to negligible compared to other current cancer treatment costs.  
20  
21 434

### 22 23 435 **Status**

24  
25 436 At the time of submission, the study selection for the systematic review has not started.  
26  
27 437

### 28 29 438 **Acknowledgements**

30  
31 439 The authors thank the Helmholtz International Graduate School for Cancer Research (HIGS) at the  
32  
33 440 German Cancer Research Center, Heidelberg, for supporting this research with a doctoral  
34  
35 441 scholarship to Sabine Kuznia.  
36  
37  
38 442

### 39 40 443 **Authors' contribution**

41  
42 444 All authors meet the ICMJE criteria for authorship as follows: BS and SK are the guarantors of the  
43  
44 445 systematic review, therefore, are accountable for all aspects of the work in ensuring that questions  
45  
46 446 related to the accuracy or integrity of any part of the work are appropriately investigated and resolved.  
47  
48 447 All authors made substantial contributions to the conception of the work. BS and SK designed the  
49  
50 448 search strategy and the risk of bias assessment strategy. BS developed the selection criteria, the  
51  
52 449 data extraction criteria, and the statistical methods. SK drafted the protocol publication, which BS  
53  
54 450 and HB revised critically for important intellectual content. All authors approved the final version to  
55  
56  
57 451 be published.  
58  
59 452  
60



1  
2 453 **Contributors**

3  
4 454 The following researchers have agreed to contribute to this systematic review by sharing IPD and  
5  
6 455 giving intellectual input for the discussion of the results: Taisuke Akutsu (Jikei University School of  
7  
8 456 Medicine. Tokyo, Japan), Professor Julie E. Buring (ScD. Brigham and Women's Hospital and  
9  
10 457 Harvard Medical School. Boston), Professor Carlos A. Camargo Jr (MD, DrPH. Massachusetts  
11  
12 458 General Hospital, Harvard Medical School. Boston), Professor Nancy R. Cook (ScD. Brigham and  
13  
14 459 Women's Hospital and Harvard Medical School. Boston), Professor I-Min Lee (MB, BS, ScD.  
15  
16  
17 460 Brigham and Women's Hospital and Harvard Medical School. Boston), Professor JoAnn E. Manson  
18  
19 461 (MD, Dr. PH. Brigham and Women's Hospital and Harvard Medical School. Boston), Professor  
20  
21 462 Robert Scragg (MBBS, PhD. School of Population Health, University of Auckland. Auckland, New  
22  
23 463 Zealand), John Sluyter (PhD. School of Population Health, University of Auckland. Auckland, New  
24  
25 464 Zealand), Professor Mitsuyoshi Urashima (MD. Jikei University School of Medicine. Tokyo, Japan),  
26  
27 465 Professor Jean Wactawski-Wende (PhD. University at Buffalo. Buffalo, New York).

28  
29 466  
30  
31 467 **Funding**

32  
33 468 A grant proposal has been submitted to the German Federal Ministry of Education and Research  
34  
35 469 (BMBF). The German Cancer Research Center is the sponsor. Neither funder nor sponsor will have  
36  
37  
38 470 a role in the design of the review protocol, data collection, data analyses, the interpretation of results,  
39  
40 471 or the decision about the publication of the results.

41  
42 472  
43  
44 473 **Data availability statement**

45  
46 474 As no new data are obtained in this systematic review, no data will be made publicly available to  
47  
48 475 third parties. Decisions on data use by third parties can only be made by the principal investigators  
49  
50 476 of the original studies, taking into account the votes of the responsible ethics committees.

51  
52  
53 477  
54  
55 478 **Disclaimer**

56  
57 479 The views of the authors do not necessarily reflect those of the German Cancer Research Center.  
58  
59 480

1  
2 481 **Competing interests**

3  
4 482 None declared.

5  
6 483  
7  
8 484 **Patient consent for publication**

9  
10 485 Not required.

11 486  
12  
13  
14 487 **Provenance and peer review**

15  
16 488 Not commissioned; externally peer-reviewed

17  
18  
19  
20 489 **REFERENCES**

- 21 490  
22 491 1. International Agency for Research on Cancer. Press Release No 263: Latest global cancer  
23 492 data: Cancer burden rises to 18.1 million new cases and 9.6 million cancer deaths in 2018.  
24 493 Available from: [https://www.iarc.fr/wp-content/uploads/2018/09/pr263\\_E.pdf](https://www.iarc.fr/wp-content/uploads/2018/09/pr263_E.pdf). Accessed: 9  
25 494 May 2020.
- 26  
27 495 2. Zhang L, Wang S, Che X, et al. Vitamin D and lung cancer risk: a comprehensive review  
28 496 and meta-analysis. *Cell Physiol Biochem*. 2015;36(1):299-305. doi:10.1159/000374072.
- 29  
30 497 3. Garland CF, Gorham ED. Dose-response of serum 25-hydroxyvitamin D in association with  
31 498 risk of colorectal cancer: A meta-analysis. *J Steroid Biochem Mol Biol*. 2017;168:1-8.  
32 499 doi:10.1016/j.jsbmb.2016.12.003.
- 33  
34 500 4. Li M, Chen P, Li J, et al. Review: the impacts of circulating 25-hydroxyvitamin D levels on  
35 501 cancer patient outcomes: a systematic review and meta-analysis. *J Clin Endocrinol Metab*.  
36 502 2014;99(7):2327-36. doi:10.1210/jc.2013-4320.
- 37  
38 503 5. Zhang H, Zhang H, Wen X, et al. Vitamin D Deficiency and Increased Risk of Bladder  
39 504 Carcinoma: A Meta-Analysis. *Cell Physiol Biochem*. 2015;37(5):1686-92.  
40 505 doi:10.1159/000438534.
- 41  
42 506 6. Heath AK, Kim IY, Hodge AM, et al. Vitamin D Status and Mortality: A Systematic Review  
43 507 of Observational Studies. *Int J Environ Res Public Health*. 2019;16(3):383.  
44 508 doi:10.3390/ijerph16030383.
- 45  
46 509 7. Schöttker B, Haug U, Schomburg L, et al. Strong associations of 25-hydroxyvitamin D  
47 510 concentrations with all-cause, cardiovascular, cancer, and respiratory disease mortality in a  
48 511 large cohort study. *Am J Clin Nutr*. 2013;97(4):782-93. doi:10.3945/ajcn.112.047712.
- 49  
50 512 8. Fleet JC, DeSmet M, Johnson R, et al. Vitamin D and cancer: a review of molecular  
51 513 mechanisms. *Biochem J*. 2012;441(1):61-76. doi:10.1042/BJ20110744.
- 52  
53 514 9. Afzal S, Brøndum-Jacobsen P, Bojesen SE, et al. Genetically low vitamin D concentrations  
54 515 and increased mortality: mendelian randomisation analysis in three large cohorts. *BMJ*.  
55 516 2014;349:g6330. doi:10.1136/bmj.g6330.
- 56  
57 517 10. Rejnmark L, Bislev LS, Cashman KD, et al. Non-skeletal health effects of vitamin D  
58 518 supplementation: A systematic review on findings from meta-analyses summarizing trial  
59 519 data. *PLoS One*. 2017;12(7):e0180512. doi:10.1371/journal.pone.0180512.

- 1  
2 520 11. Bjelakovic G, Gluud LL, Nikolova D, et al. Vitamin D supplementation for prevention of  
3 521 mortality in adults. *Cochrane Database Syst Rev*. 2011(7).  
4 522 doi:10.1002/14651858.CD007470.pub2.  
5  
6 523 12. Keum N, Lee DH, Greenwood DC, et al. Vitamin D supplementation and total cancer  
7 524 incidence and mortality: a meta-analysis of randomized controlled trials. *Ann Oncol*.  
8 525 2019;30(5):733-43. doi:10.1093/annonc/mdz059.  
9  
10 526 13. Goulão B, Stewart F, Ford JA, et al. Cancer and vitamin D supplementation: a systematic  
11 527 review and meta-analysis. *Am J Clin Nutr*. 2018;107(4):652-63. doi:10.1093/ajcn/nqx047.  
12  
13 528 14. Corrigendum for Goulao B et al. Cancer and vitamin D supplementation: systematic review  
14 529 and meta-analysis. *Am J Clin Nutr* 2018;107:652-63. *Am J Clin Nutr*. 2020;111(3):729-30.  
15 530 doi:10.1093/ajcn/nqz287.  
16  
17 531 15. Zhang Y, Fang F, Tang J, et al. Association between vitamin D supplementation and  
18 532 mortality: systematic review and meta-analysis. *BMJ*. 2019;366:l4673.  
19 533 doi:10.1136/bmj.l4673.  
20  
21 534 16. Brenner H, Jansen L, Saum K-U, et al. Vitamin D Supplementation Trials Aimed at  
22 535 Reducing Mortality Have Much Higher Power When Focusing on People with Low Serum  
23 536 25-Hydroxyvitamin D Concentrations. *J Nutr*. 2017;147(7):1325-33.  
24 537 doi:10.3945/jn.117.250191.  
25  
26 538 17. Maalmi H, Walter V, Jansen L, et al. Association between Blood 25-Hydroxyvitamin D  
27 539 Levels and Survival in Colorectal Cancer Patients: An Updated Systematic Review and  
28 540 Meta-Analysis. *Nutrients*. 2018;10(7):896. doi:10.3390/nu10070896.  
29  
30 541 18. Maalmi H, Walter V, Jansen L, et al. Relationship of very low serum 25-hydroxyvitamin D3  
31 542 levels with long-term survival in a large cohort of colorectal cancer patients from Germany.  
32 543 *Eur J Epidemiol*. 2017;32(11):961-71. doi:10.1007/s10654-017-0298-z.  
33  
34 544 19. Toriola AT, Nguyen N, Scheitler-Ring K, et al. Circulating 25-hydroxyvitamin D levels and  
35 545 prognosis among cancer patients: a systematic review. *Cancer Epidemiol Biomarkers Prev*.  
36 546 2014;23(6):917-33. doi:10.1158/1055-9965.EPI-14-0053.  
37  
38 547 20. Heaney RP, Armas LAG. Quantifying the vitamin D economy. *Nutr Rev*. 2014;73(1):51-67.  
39 548 doi:10.1093/nutrit/nuu004.  
40  
41 549 21. Chowdhury R, Kunutsor S, Vitezova A, et al. Vitamin D and risk of cause specific death:  
42 550 systematic review and meta-analysis of observational cohort and randomised intervention  
43 551 studies. *BMJ*. 2014;348:g1903. doi:10.1136/bmj.g1903.  
44  
45 552 22. Moher D, Shamseer L, Clarke M, et al. Preferred reporting items for systematic review and  
46 553 meta-analysis protocols (PRISMA-P) 2015 statement. *Syst Rev*. 2015;4(1):1.  
47 554 doi:10.1186/2046-4053-4-1.  
48  
49 555 23. Shamseer L, Moher D, Clarke M, et al. Preferred reporting items for systematic review and  
50 556 meta-analysis protocols (PRISMA-P) 2015: elaboration and explanation. *BMJ*.  
51 557 2015;349:g7647. doi:10.1136/bmj.g7647 %J BMJ : British Medical Journal.  
52  
53 558 24. Institute of Medicine 2011. Finding What Works in Health Care: Standards for Systematic  
54 559 Reviews. Washington, DC: The National Academies Press. doi:10.17226/13059.  
55  
56 560 25. Higgins JPT, Thomas J, Chandler J, Cumpston M, Li T, Page MJ, Welch VA (editors).  
57 561 *Cochrane Handbook for Systematic Reviews of Interventions* version 6.1 (updated  
58 562 September 2020). Cochrane, 2020. Available from [www.training.cochrane.org/handbook](http://www.training.cochrane.org/handbook).

- 1  
2 563 26. Moher D, Liberati A, Tetzlaff J, et al. Preferred reporting items for systematic reviews and  
3 564 meta-analyses: the PRISMA statement. *PLoS Med*. 2009;6(7):e1000097.  
4 565 doi:10.1371/journal.pmed.1000097.  
5  
6 566 27. Liberati A, Altman DG, Tetzlaff J, et al. The PRISMA statement for reporting systematic  
7 567 reviews and meta-analyses of studies that evaluate health care interventions: explanation  
8 568 and elaboration. *PLoS Med*. 2009;6(7):e1000100. doi:10.1371/journal.pmed.1000100.  
9  
10 569 28. Sterne JAC, Savović J, Page MJ, Elbers RG, Blencowe NS, Boutron I, Cates CJ, Cheng H-  
11 570 Y, Corbett MS, Eldridge SM, Hernán MA, Hopewell S, Hróbjartsson A, Junqueira DR, Jüni  
12 571 P, Kirkham JJ, Lasserson T, Li T, McAleenan A, Reeves BC, Shepperd S, Shrier I, Stewart  
13 572 LA, Tilling K, White IR, Whiting PF, Higgins JPT. RoB 2: a revised tool for assessing risk of  
14 573 bias in randomised trials. *BMJ* 2019; 366: 14898.  
15  
16 574 29. Higgins JPT, Savović J, Page MJ, Elbers RG, Sterne JAC. Chapter 8: Assessing risk of  
17 575 bias in a randomized trial. In: Higgins JPT, Thomas J, Chandler J, Cumpston M, Li T, Page  
18 576 MJ, Welch VA (editors). *Cochrane Handbook for Systematic Reviews of Interventions*  
19 577 version 6.1 (updated September 2020). Cochrane, 2020. Available from  
20 578 [www.training.cochrane.org/handbook](http://www.training.cochrane.org/handbook).  
21  
22  
23 579 30. Krebsinformationsdienst Deutsches Krebsforschungszentrum. Krebs-Selbsthilfegruppen  
24 580 und Patientenverbände. Updated 06 August 2018. Available from:  
25 581 <https://www.krebsinformationsdienst.de/service/adressen/selbsthilfe.php#inhalt17>.  
26 582 Accessed: 9 May 2020.  
27  
28 583 31. BAR e.V. BAR-Verzeichnis von stationären Einrichtungen der medizinischen Rehabilitation.  
29 584 Available from: [https://www.bar-frankfurt.de/service/datenbanken-](https://www.bar-frankfurt.de/service/datenbanken-verzeichnisse/rehaklinikenverzeichnis/rehastuetten-suche.html)  
30 585 [verzeichnisse/rehaklinikenverzeichnis/rehastuetten-suche.html](https://www.bar-frankfurt.de/service/datenbanken-verzeichnisse/rehaklinikenverzeichnis/rehastuetten-suche.html). Accessed: 9 May 2020.  
31  
32  
33  
34  
35  
36  
37  
38  
39  
40  
41  
42  
43  
44  
45  
46  
47  
48  
49  
50  
51  
52  
53  
54  
55  
56  
57  
58  
59  
60

1  
2 586 **Appendix 1:**  
3

4 587 Supplementary material consisting of data extraction form, risk of bias assessment and list of  
5  
6  
7 588 individual patient data to be obtained from original researchers

8  
9 589 **Appendix 2:**  
10

11 590 Supplementary material consisting of PRISMA-P checklist  
12  
13  
14  
15  
16  
17  
18  
19  
20  
21  
22  
23  
24  
25  
26  
27  
28  
29  
30  
31  
32  
33  
34  
35  
36  
37  
38  
39  
40  
41  
42  
43  
44  
45  
46  
47  
48  
49  
50  
51  
52  
53  
54  
55  
56  
57  
58  
59  
60

For peer review only

1  
2 591 **Figure**

3 592

4 593

6  
7 594 **Figure 1:** Draft of the study selection process

8  
9  
10  
11  
12  
13  
14  
15  
16  
17  
18  
19  
20  
21  
22  
23  
24  
25  
26  
27  
28  
29  
30  
31  
32  
33  
34  
35  
36  
37  
38  
39  
40  
41  
42  
43  
44  
45  
46  
47  
48  
49  
50  
51  
52  
53  
54  
55  
56  
57  
58  
59  
60

For peer review only

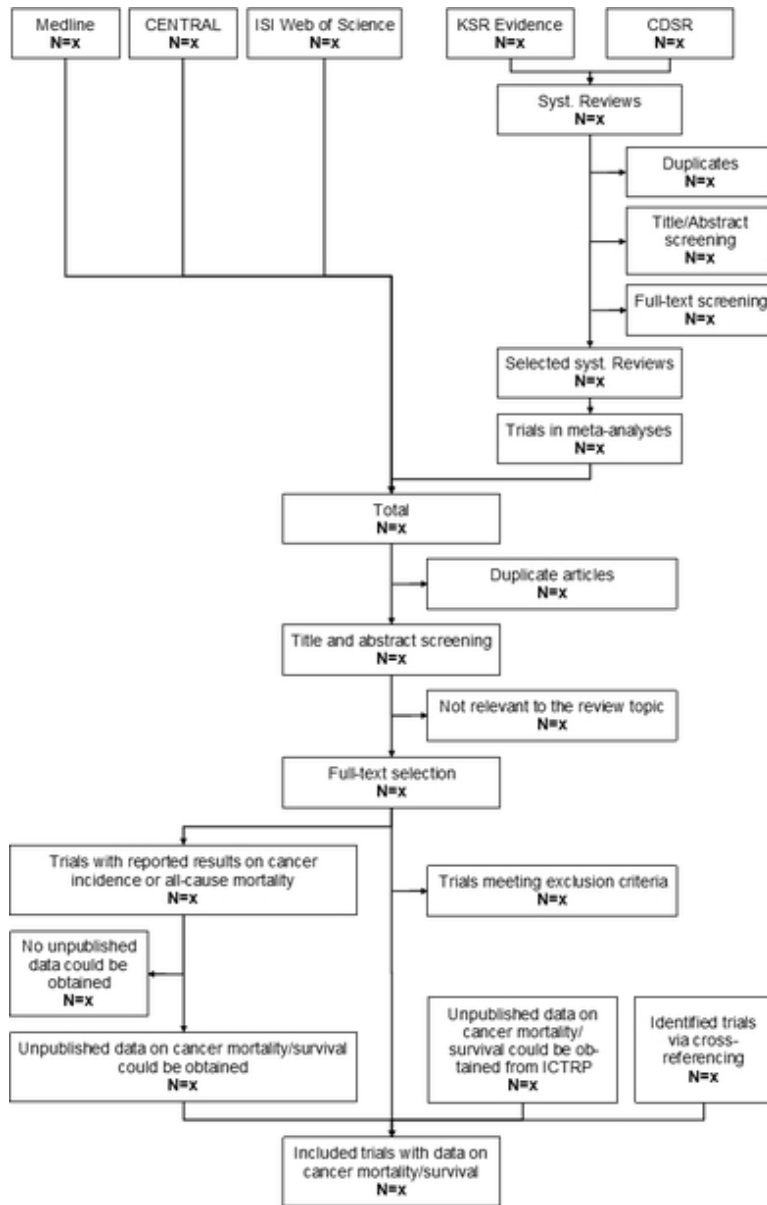

Figure 1: Draft of the study selection process

16x25mm (600 x 600 DPI)

1  
2  
3  
4  
5  
6  
7  
8  
9  
10  
11  
12  
13  
14  
15  
16  
17  
18  
19  
20  
21  
22  
23  
24  
25  
26  
27  
28  
29  
30  
31  
32  
33  
34  
35  
36  
37  
38  
39  
40  
41  
42  
43  
44  
45  
46  
47  
48  
49  
50  
51  
52  
53  
54  
55  
56  
57  
58  
59  
60

| Study                                    |         |             | Population               |                         |                     |                      |                |
|------------------------------------------|---------|-------------|--------------------------|-------------------------|---------------------|----------------------|----------------|
| First author (or study name), Year (REF) | Country | Sample size | General population (y/n) | Cancer population (y/n) | Cancer site + stage | Age (mean or median) | Sex (female %) |
|                                          |         |             |                          |                         |                     |                      |                |
|                                          |         |             |                          |                         |                     |                      |                |
|                                          |         |             |                          |                         |                     |                      |                |
|                                          |         |             |                          |                         |                     |                      |                |
|                                          |         |             |                          |                         |                     |                      |                |
|                                          |         |             |                          |                         |                     |                      |                |
|                                          |         |             |                          |                         |                     |                      |                |
|                                          |         |             |                          |                         |                     |                      |                |
|                                          |         |             |                          |                         |                     |                      |                |
|                                          |         |             |                          |                         |                     |                      |                |
|                                          |         |             |                          |                         |                     |                      |                |
|                                          |         |             |                          |                         |                     |                      |                |
|                                          |         |             |                          |                         |                     |                      |                |
|                                          |         |             |                          |                         |                     |                      |                |
|                                          |         |             |                          |                         |                     |                      |                |
|                                          |         |             |                          |                         |                     |                      |                |
|                                          |         |             |                          |                         |                     |                      |                |
|                                          |         |             |                          |                         |                     |                      |                |
|                                          |         |             |                          |                         |                     |                      |                |
|                                          |         |             |                          |                         |                     |                      |                |
|                                          |         |             |                          |                         |                     |                      |                |
|                                          |         |             |                          |                         |                     |                      |                |
|                                          |         |             |                          |                         |                     |                      |                |
|                                          |         |             |                          |                         |                     |                      |                |
|                                          |         |             |                          |                         |                     |                      |                |
|                                          |         |             |                          |                         |                     |                      |                |
|                                          |         |             |                          |                         |                     |                      |                |

For peer review only



1  
2  
3  
4  
5  
6  
7  
8  
9  
10  
11  
12  
13  
14  
15  
16  
17  
18  
19  
20  
21  
22  
23  
24  
25  
26  
27  
28  
29  
30  
31  
32  
33  
34  
35  
36  
37  
38  
39  
40  
41  
42  
43  
44  
45  
46  
47  
48  
49  
50  
51  
52  
53  
54  
55  
56  
57  
58  
59  
60

|                                       |                                              |                             | Intervention                          |                                        |                                      | Comp              |
|---------------------------------------|----------------------------------------------|-----------------------------|---------------------------------------|----------------------------------------|--------------------------------------|-------------------|
| Race/ ethnicity/ skin color (white %) | BMI [kg/m <sup>2</sup> ] (n, mean or median) | 25(OH)D (n, mean or median) | Vitamin D <sub>3</sub> dosing regimen | Duration of vitamin D3 supplementation | Compliance in intervention group (%) | Placebo (y/other) |
|                                       |                                              |                             |                                       |                                        |                                      |                   |
|                                       |                                              |                             |                                       |                                        |                                      |                   |
|                                       |                                              |                             |                                       |                                        |                                      |                   |
|                                       |                                              |                             |                                       |                                        |                                      |                   |
|                                       |                                              |                             |                                       |                                        |                                      |                   |
|                                       |                                              |                             |                                       |                                        |                                      |                   |
|                                       |                                              |                             |                                       |                                        |                                      |                   |
|                                       |                                              |                             |                                       |                                        |                                      |                   |
|                                       |                                              |                             |                                       |                                        |                                      |                   |
|                                       |                                              |                             |                                       |                                        |                                      |                   |
|                                       |                                              |                             |                                       |                                        |                                      |                   |
|                                       |                                              |                             |                                       |                                        |                                      |                   |
|                                       |                                              |                             |                                       |                                        |                                      |                   |
|                                       |                                              |                             |                                       |                                        |                                      |                   |
|                                       |                                              |                             |                                       |                                        |                                      |                   |
|                                       |                                              |                             |                                       |                                        |                                      |                   |
|                                       |                                              |                             |                                       |                                        |                                      |                   |
|                                       |                                              |                             |                                       |                                        |                                      |                   |
|                                       |                                              |                             |                                       |                                        |                                      |                   |
|                                       |                                              |                             |                                       |                                        |                                      |                   |
|                                       |                                              |                             |                                       |                                        |                                      |                   |
|                                       |                                              |                             |                                       |                                        |                                      |                   |
|                                       |                                              |                             |                                       |                                        |                                      |                   |
|                                       |                                              |                             |                                       |                                        |                                      |                   |
|                                       |                                              |                             |                                       |                                        |                                      |                   |
|                                       |                                              |                             |                                       |                                        |                                      |                   |
|                                       |                                              |                             |                                       |                                        |                                      |                   |
|                                       |                                              |                             |                                       |                                        |                                      |                   |
|                                       |                                              |                             |                                       |                                        |                                      |                   |
|                                       |                                              |                             |                                       |                                        |                                      |                   |
|                                       |                                              |                             |                                       |                                        |                                      |                   |
|                                       |                                              |                             |                                       |                                        |                                      |                   |
|                                       |                                              |                             |                                       |                                        |                                      |                   |
|                                       |                                              |                             |                                       |                                        |                                      |                   |
|                                       |                                              |                             |                                       |                                        |                                      |                   |
|                                       |                                              |                             |                                       |                                        |                                      |                   |

1  
2  
3  
4  
5  
6  
7  
8  
9  
10  
11  
12  
13  
14  
15  
16  
17  
18  
19  
20  
21  
22  
23  
24  
25  
26  
27  
28  
29  
30  
31  
32  
33  
34  
35  
36  
37  
38  
39  
40  
41  
42  
43  
44  
45  
46  
47  
48  
49  
50  
51  
52  
53  
54  
55  
56  
57  
58  
59  
60

| Comparator                         | Outcomes               |                               |                     |                                                    |                                                         |
|------------------------------------|------------------------|-------------------------------|---------------------|----------------------------------------------------|---------------------------------------------------------|
| Compliance in comparator group (%) | Maximum follow-up time | Mean or median follow-up time | No of cancer deaths | Cancer mortality in general population HR (95% CI) | Cancer-specific survival of cancer patients HR (95% CI) |
|                                    |                        |                               |                     |                                                    |                                                         |
|                                    |                        |                               |                     |                                                    |                                                         |
|                                    |                        |                               |                     |                                                    |                                                         |
|                                    |                        |                               |                     |                                                    |                                                         |
|                                    |                        |                               |                     |                                                    |                                                         |
|                                    |                        |                               |                     |                                                    |                                                         |
|                                    |                        |                               |                     |                                                    |                                                         |
|                                    |                        |                               |                     |                                                    |                                                         |
|                                    |                        |                               |                     |                                                    |                                                         |
|                                    |                        |                               |                     |                                                    |                                                         |
|                                    |                        |                               |                     |                                                    |                                                         |
|                                    |                        |                               |                     |                                                    |                                                         |
|                                    |                        |                               |                     |                                                    |                                                         |
|                                    |                        |                               |                     |                                                    |                                                         |
|                                    |                        |                               |                     |                                                    |                                                         |
|                                    |                        |                               |                     |                                                    |                                                         |
|                                    |                        |                               |                     |                                                    |                                                         |
|                                    |                        |                               |                     |                                                    |                                                         |
|                                    |                        |                               |                     |                                                    |                                                         |
|                                    |                        |                               |                     |                                                    |                                                         |
|                                    |                        |                               |                     |                                                    |                                                         |
|                                    |                        |                               |                     |                                                    |                                                         |

1  
2  
3  
4  
5  
6  
7  
8  
9  
10  
11  
12  
13  
14  
15  
16  
17  
18  
19  
20  
21  
22  
23  
24  
25  
26  
27  
28  
29  
30  
31  
32  
33  
34  
35  
36  
37  
38  
39  
40  
41  
42  
43  
44  
45  
46  
47  
48  
49  
50  
51  
52  
53  
54  
55  
56  
57  
58  
59  
60

|                                                   |                         | Comments |
|---------------------------------------------------|-------------------------|----------|
| Overall survival of cancer patients<br>HR (95%CI) | Covariates adjusted for |          |
|                                                   |                         |          |
|                                                   |                         |          |
|                                                   |                         |          |
|                                                   |                         |          |
|                                                   |                         |          |
|                                                   |                         |          |
|                                                   |                         |          |
|                                                   |                         |          |
|                                                   |                         |          |
|                                                   |                         |          |
|                                                   |                         |          |
|                                                   |                         |          |
|                                                   |                         |          |
|                                                   |                         |          |
|                                                   |                         |          |
|                                                   |                         |          |
|                                                   |                         |          |
|                                                   |                         |          |

For peer review only

| First author (or study name), Year (REF) | R | D | Mi | Me | S | O |
|------------------------------------------|---|---|----|----|---|---|
|                                          |   |   |    |    |   |   |
|                                          |   |   |    |    |   |   |
|                                          |   |   |    |    |   |   |
|                                          |   |   |    |    |   |   |
|                                          |   |   |    |    |   |   |
|                                          |   |   |    |    |   |   |
|                                          |   |   |    |    |   |   |
|                                          |   |   |    |    |   |   |
|                                          |   |   |    |    |   |   |
|                                          |   |   |    |    |   |   |
|                                          |   |   |    |    |   |   |
|                                          |   |   |    |    |   |   |
|                                          |   |   |    |    |   |   |
|                                          |   |   |    |    |   |   |
|                                          |   |   |    |    |   |   |
|                                          |   |   |    |    |   |   |
|                                          |   |   |    |    |   |   |
|                                          |   |   |    |    |   |   |
|                                          |   |   |    |    |   |   |

**Risk of bias legend**

- R** Bias arising from the randomiation
- D** Bias due to deviations from
- Mi** Bias due to missing outcome data
- Me** Bias in measurement of the
- S** Bias in selection of the reported
- O** Overall risk of bias

For peer review only

1  
2  
3  
4  
5  
6  
7  
8  
9  
10  
11  
12  
13  
14  
15  
16  
17  
18  
19  
20  
21  
22  
23  
24  
25  
26  
27  
28  
29  
30  
31  
32  
33  
34  
35  
36  
37  
38  
39  
40  
41  
42  
43  
44  
45  
46  
47  
48  
49  
50  
51  
52  
53  
54  
55  
56  
57  
58  
59  
60

The following variables will be obtained for all trial participants in order to conduct the IPD meta-

| No. | Variables                                                                  |
|-----|----------------------------------------------------------------------------|
| 1   | Age                                                                        |
| 2   | Sex                                                                        |
| 3   | BMI                                                                        |
| 4   | Race/ethnicity/skin color                                                  |
| 5   | Baseline 25(OH)D levels                                                    |
| 6   | Compliance                                                                 |
| 7   | Randomisation group allocation                                             |
| 8   | Baseline date                                                              |
| 9   | Death during follow-up (y/n)                                               |
| 10  | Date of death                                                              |
| 11  | Censoring date for survivors                                               |
| 12  | Cancer death during follow-up (y/n)                                        |
| 13  | Date of cancer death                                                       |
| 14  | Censoring date for non-cancer deaths                                       |
| 15  | Cancer* diagnosis during follow-up (y/n)                                   |
| 16  | Cancer* site for each cancer during follow-up                              |
| 17  | Cancer* stage for each cancer during follow-up                             |
| 18  | Date of cancer* diagnosis for each cancer during follow-up                 |
| 19  | Cancer* diagnosis in first 5 years before baseline (y/n)                   |
| 20  | Cancer* site for each cancer in first 5 years before baseline              |
| 21  | Cancer* stage for each cancer in first 5 years before baseline             |
| 22  | Date of cancer* diagnosis for each cancer in first 5 years before baseline |

\* Excluding non-melanoma skin cancers and benign tumors

1  
2 **analysis:**  
3  
4  
5  
6  
7  
8  
9  
10  
11  
12  
13  
14  
15  
16  
17  
18  
19  
20  
21  
22  
23  
24  
25  
26  
27  
28  
29  
30  
31  
32  
33  
34  
35  
36  
37  
38  
39  
40  
41  
42  
43  
44  
45  
46  
47  
48  
49  
50  
51  
52  
53  
54  
55  
56  
57  
58  
59  
60

For peer review only

## PRISMA-P 2015 Checklist

This checklist has been adapted for use with protocol submissions to *Systematic Reviews* from Table 3 in Moher D et al: Preferred reporting items for systematic review and meta-analysis protocols (PRISMA-P) 2015 statement. *Systematic Reviews* 2015 4:1

| Section/topic                     | #  | Checklist item                                                                                                                                                                                  | Information reported                |                                     | Line number(s)          |
|-----------------------------------|----|-------------------------------------------------------------------------------------------------------------------------------------------------------------------------------------------------|-------------------------------------|-------------------------------------|-------------------------|
|                                   |    |                                                                                                                                                                                                 | Yes                                 | No                                  |                         |
| <b>ADMINISTRATIVE INFORMATION</b> |    |                                                                                                                                                                                                 |                                     |                                     |                         |
| <b>Title</b>                      |    |                                                                                                                                                                                                 |                                     |                                     |                         |
| Identification                    | 1a | Identify the report as a protocol of a systematic review                                                                                                                                        | <input checked="" type="checkbox"/> | <input type="checkbox"/>            | 1-4                     |
| Update                            | 1b | If the protocol is for an update of a previous systematic review, identify as such                                                                                                              | <input type="checkbox"/>            | <input checked="" type="checkbox"/> | n.a. (first submission) |
| <b>Registration</b>               | 2  | If registered, provide the name of the registry (e.g., PROSPERO) and registration number in the Abstract                                                                                        | <input checked="" type="checkbox"/> | <input type="checkbox"/>            | 63-64                   |
| <b>Authors</b>                    |    |                                                                                                                                                                                                 |                                     |                                     |                         |
| Contact                           | 3a | Provide name, institutional affiliation, and e-mail address of all protocol authors; provide physical mailing address of corresponding author                                                   | <input checked="" type="checkbox"/> | <input type="checkbox"/>            | 6-34                    |
| Contributions                     | 3b | Describe contributions of protocol authors and identify the guarantor of the review                                                                                                             | <input checked="" type="checkbox"/> | <input type="checkbox"/>            | 443-451                 |
| <b>Amendments</b>                 | 4  | If the protocol represents an amendment of a previously completed or published protocol, identify as such and list changes; otherwise, state plan for documenting important protocol amendments | <input checked="" type="checkbox"/> | <input type="checkbox"/>            | 370-372                 |
| <b>Support</b>                    |    |                                                                                                                                                                                                 |                                     |                                     |                         |
| Sources                           | 5a | Indicate sources of financial or other support for the review                                                                                                                                   | <input checked="" type="checkbox"/> | <input type="checkbox"/>            | 467-471                 |
| Sponsor                           | 5b | Provide name for the review funder and/or sponsor                                                                                                                                               | <input checked="" type="checkbox"/> | <input type="checkbox"/>            | 467-471                 |
| Role of sponsor/funder            | 5c | Describe roles of funder(s), sponsor(s), and/or institution(s), if any, in developing the protocol                                                                                              | <input checked="" type="checkbox"/> | <input type="checkbox"/>            | 467-471                 |
| <b>INTRODUCTION</b>               |    |                                                                                                                                                                                                 |                                     |                                     |                         |
| <b>Rationale</b>                  | 6  | Describe the rationale for the review in the context of what is already known                                                                                                                   | <input checked="" type="checkbox"/> | <input type="checkbox"/>            | 79-124                  |
| <b>Objectives</b>                 | 7  | Provide an explicit statement of the question(s) the review will address with reference to participants, interventions, comparators, and outcomes (PICO)                                        | <input checked="" type="checkbox"/> | <input type="checkbox"/>            | 126-140                 |
| <b>METHODS</b>                    |    |                                                                                                                                                                                                 |                                     |                                     |                         |

| Section/topic                             | #   | Checklist item                                                                                                                                                                                                                              | Information reported                |                                     | Line number(s)             |
|-------------------------------------------|-----|---------------------------------------------------------------------------------------------------------------------------------------------------------------------------------------------------------------------------------------------|-------------------------------------|-------------------------------------|----------------------------|
|                                           |     |                                                                                                                                                                                                                                             | Yes                                 | No                                  |                            |
| <b>Eligibility criteria</b>               | 8   | Specify the study characteristics (e.g., PICO, study design, setting, time frame) and report characteristics (e.g., years considered, language, publication status) to be used as criteria for eligibility for the review                   | <input checked="" type="checkbox"/> | <input type="checkbox"/>            | 150-190                    |
| <b>Information sources</b>                | 9   | Describe all intended information sources (e.g., electronic databases, contact with study authors, trial registers, or other grey literature sources) with planned dates of coverage                                                        | <input checked="" type="checkbox"/> | <input type="checkbox"/>            | 192-225                    |
| <b>Search strategy</b>                    | 10  | Present draft of search strategy to be used for at least one electronic database, including planned limits, such that it could be repeated                                                                                                  | <input checked="" type="checkbox"/> | <input type="checkbox"/>            | 217-218, 224-225, figure 1 |
| <b>STUDY RECORDS</b>                      |     |                                                                                                                                                                                                                                             |                                     |                                     |                            |
| Data management                           | 11a | Describe the mechanism(s) that will be used to manage records and data throughout the review                                                                                                                                                | <input checked="" type="checkbox"/> | <input type="checkbox"/>            | 227-262                    |
| Selection process                         | 11b | State the process that will be used for selecting studies (e.g., two independent reviewers) through each phase of the review (i.e., screening, eligibility, and inclusion in meta-analysis)                                                 | <input checked="" type="checkbox"/> | <input type="checkbox"/>            | 227-262                    |
| Data collection process                   | 11c | Describe planned method of extracting data from reports (e.g., piloting forms, done independently, in duplicate), any processes for obtaining and confirming data from investigators                                                        | <input checked="" type="checkbox"/> | <input type="checkbox"/>            | 227-262, appendix 1        |
| <b>Data items</b>                         | 12  | List and define all variables for which data will be sought (e.g., PICO items, funding sources), any pre-planned data assumptions and simplifications                                                                                       | <input checked="" type="checkbox"/> | <input type="checkbox"/>            | 361-363, appendix 1        |
| <b>Outcomes and prioritization</b>        | 13  | List and define all outcomes for which data will be sought, including prioritization of main and additional outcomes, with rationale                                                                                                        | <input checked="" type="checkbox"/> | <input type="checkbox"/>            | 131-133, 168-172, table 2  |
| <b>Risk of bias in individual studies</b> | 14  | Describe anticipated methods for assessing risk of bias of individual studies, including whether this will be done at the outcome or study level, or both; state how this information will be used in data synthesis                        | <input checked="" type="checkbox"/> | <input type="checkbox"/>            | 264-282, 347-360           |
| <b>DATA</b>                               |     |                                                                                                                                                                                                                                             |                                     |                                     |                            |
| <b>Synthesis</b>                          | 15a | Describe criteria under which study data will be quantitatively synthesized                                                                                                                                                                 | <input checked="" type="checkbox"/> | <input type="checkbox"/>            | 290-297                    |
|                                           | 15b | If data are appropriate for quantitative synthesis, describe planned summary measures, methods of handling data, and methods of combining data from studies, including any planned exploration of consistency (e.g., $I^2$ , Kendall's tau) | <input checked="" type="checkbox"/> | <input type="checkbox"/>            | 297-325, 345-358           |
|                                           | 15c | Describe any proposed additional analyses (e.g., sensitivity or subgroup analyses, meta-regression)                                                                                                                                         | <input checked="" type="checkbox"/> | <input type="checkbox"/>            | 326-344, 351-358           |
|                                           | 15d | If quantitative synthesis is not appropriate, describe the type of summary planned                                                                                                                                                          | <input type="checkbox"/>            | <input checked="" type="checkbox"/> | n.a. (quantitative)        |



1  
2  
3  
4  
5  
6  
7  
8  
9  
10  
11  
12  
13  
14  
15  
16  
17  
18  
19  
20  
21  
22  
23  
24  
25  
26  
27  
28  
29  
30  
31  
32  
33  
34  
35  
36  
37  
38  
39  
40  
41  
42  
43  
44  
45  
46

| Section/topic                            | #  | Checklist item                                                                                                              | Information reported                |                          | Line number(s)               |
|------------------------------------------|----|-----------------------------------------------------------------------------------------------------------------------------|-------------------------------------|--------------------------|------------------------------|
|                                          |    |                                                                                                                             | Yes                                 | No                       |                              |
|                                          |    |                                                                                                                             |                                     |                          | synthesis will be performed) |
| <b>Meta-bias(es)</b>                     | 16 | Specify any planned assessment of meta-bias(es) (e.g., publication bias across studies, selective reporting within studies) | <input checked="" type="checkbox"/> | <input type="checkbox"/> | 359-360                      |
| <b>Confidence in cumulative evidence</b> | 17 | Describe how the strength of the body of evidence will be assessed (e.g., GRADE)                                            | <input checked="" type="checkbox"/> | <input type="checkbox"/> | 364-369                      |

For peer review only

# BMJ Open

## **Efficacy of Vitamin D3 supplementation on cancer mortality in the general population and the prognosis of cancer patients: Protocol of a systematic review and individual patient data meta-analysis of randomized controlled trials**

|                                 |                                                                                                                                                                                                                                                                                                                                                                                                                                           |
|---------------------------------|-------------------------------------------------------------------------------------------------------------------------------------------------------------------------------------------------------------------------------------------------------------------------------------------------------------------------------------------------------------------------------------------------------------------------------------------|
| Journal:                        | <i>BMJ Open</i>                                                                                                                                                                                                                                                                                                                                                                                                                           |
| Manuscript ID                   | bmjopen-2020-041607.R2                                                                                                                                                                                                                                                                                                                                                                                                                    |
| Article Type:                   | Protocol                                                                                                                                                                                                                                                                                                                                                                                                                                  |
| Date Submitted by the Author:   | 16-Nov-2020                                                                                                                                                                                                                                                                                                                                                                                                                               |
| Complete List of Authors:       | Schöttker, Ben; German Cancer Research Centre, Division of Clinical Epidemiology and Aging Research; University of Heidelberg, Network Aging Research<br>Kuznia, Sabine; German Cancer Research Centre, Division of Clinical Epidemiology and Aging Research<br>Brenner, Hermann; German Cancer Research Centre, Division of Clinical Epidemiology and Aging Research; National Center of Tumor Diseases, Division of Preventive Oncology |
| <b>Primary Subject Heading</b>: | Patient-centred medicine                                                                                                                                                                                                                                                                                                                                                                                                                  |
| Secondary Subject Heading:      | Public health                                                                                                                                                                                                                                                                                                                                                                                                                             |
| Keywords:                       | Nutritional support < ONCOLOGY, ONCOLOGY, NUTRITION & DIETETICS, PUBLIC HEALTH, Protocols & guidelines < HEALTH SERVICES ADMINISTRATION & MANAGEMENT, Epidemiology < ONCOLOGY                                                                                                                                                                                                                                                             |
|                                 |                                                                                                                                                                                                                                                                                                                                                                                                                                           |

SCHOLARONE™  
Manuscripts



I, the Submitting Author has the right to grant and does grant on behalf of all authors of the Work (as defined in the below author licence), an exclusive licence and/or a non-exclusive licence for contributions from authors who are: i) UK Crown employees; ii) where BMJ has agreed a CC-BY licence shall apply, and/or iii) in accordance with the terms applicable for US Federal Government officers or employees acting as part of their official duties; on a worldwide, perpetual, irrevocable, royalty-free basis to BMJ Publishing Group Ltd ("BMJ") its licensees and where the relevant Journal is co-owned by BMJ to the co-owners of the Journal, to publish the Work in this journal and any other BMJ products and to exploit all rights, as set out in our [licence](#).

The Submitting Author accepts and understands that any supply made under these terms is made by BMJ to the Submitting Author unless you are acting as an employee on behalf of your employer or a postgraduate student of an affiliated institution which is paying any applicable article publishing charge ("APC") for Open Access articles. Where the Submitting Author wishes to make the Work available on an Open Access basis (and intends to pay the relevant APC), the terms of reuse of such Open Access shall be governed by a Creative Commons licence – details of these licences and which [Creative Commons](#) licence will apply to this Work are set out in our licence referred to above.

Other than as permitted in any relevant BMJ Author's Self Archiving Policies, I confirm this Work has not been accepted for publication elsewhere, is not being considered for publication elsewhere and does not duplicate material already published. I confirm all authors consent to publication of this Work and authorise the granting of this licence.

1  
2  
3 1 **Efficacy of Vitamin D<sub>3</sub> supplementation on cancer mortality in the**  
4  
5 2 **general population and the prognosis of cancer patients: Protocol of a**  
6  
7 3 **systematic review and individual patient data meta-analysis of**  
8  
9 4 **randomized controlled trials**

10  
11 5  
12 6 Ben Schöttker<sup>1,2\*</sup>, Sabine Kuznia<sup>1\*</sup>, Hermann Brenner<sup>1-4</sup>

13 7  
14  
15 8 <sup>1</sup> Division of Clinical Epidemiology and Aging Research, German Cancer Research Center (DKFZ),  
16 9 Im Neuenheimer Feld 581, 69120 Heidelberg, Germany

17  
18 10 <sup>2</sup> Network Aging Research (NAR), University of Heidelberg, Bergheimer Straße 20, 69115  
19 11 Heidelberg, Germany

20  
21 12 <sup>3</sup> Division of Preventive Oncology, German Cancer Research Center (DKFZ) and National Center  
22 13 for Tumor Diseases (NCT), Im Neuenheimer Feld 460, 69120 Heidelberg, Germany

23  
24 14 <sup>4</sup> German Cancer Consortium (DKTK), German Cancer Research Center (DKFZ), Im Neuenheimer  
25 15 Feld 280, 69120 Heidelberg, Germany

26 16  
27  
28 17  
29  
30 18  
31 19 \* Ben Schöttker and Sabine Kuznia share the first authorship and contributed equally to the  
32 20 preparation of the manuscript.

33  
34  
35 21  
36 22 **Corresponding author:**

37 23 Ben Schöttker,  
38 24 Division of Clinical Epidemiology and Aging Research,  
39 25 German Cancer Research Center (DKFZ),  
40 26 Im Neuenheimer Feld 581,  
41 27 69120 Heidelberg, Germany,  
42 28 Phone: +49 6221 42 1355,  
43 29 E-Mail: b.schoettker@dkfz.de  
44  
45  
46  
47  
48  
49

50 30  
51  
52 31 **E-Mails:**

53 32 Ben Schöttker - b.schoettker@dkfz.de  
54 33 Sabine Kuznia – s.kuznia@dkfz.de  
55 34 Hermann Brenner - h.brenner@dkfz.de  
56  
57  
58  
59

60 35  
36 Word Count (excluding title page, abstract, references, figures, and tables): 4,351

## 37 **ABSTRACT**

### 38 **Introduction**

39 Vitamin D insufficiency is much more common among cancer patients than the general population.  
40 Previous meta-analyses of controlled trials showed an approximately 15% reduction of cancer  
41 mortality by vitamin D supplementation compared to placebo or no treatment in the general  
42 population.

43 On top of updating the latest systematic review on vitamin D supplementation and cancer mortality  
44 in the general population, we aim to conduct the first meta-analyses of trials on vitamin D<sub>3</sub>  
45 supplementation and cancer-specific and overall survival of cancer patients. Besides, we will conduct  
46 for the first time subgroup analyses based on individual patient data collected from randomized  
47 controlled trials.

### 48 **Methods and analysis**

49 A systematic review and individual patient data meta-analysis will be performed on randomized  
50 placebo-controlled trials with a vitamin D<sub>3</sub> intervention. All databases are searched from inception  
51 without time restriction. The addressed outcomes are cancer mortality in the general population as  
52 well as cancer-specific and overall survival of cancer patients. The quality appraisal of the studies  
53 will be evaluated by the Cochrane risk-of-bias tool for randomized trials. Trial results will be re-  
54 analyzed using adjusted and unadjusted Cox proportional hazard regression models and meta-  
55 analyses are planned. Cochran's Q-Test and the I<sup>2</sup> index will be used to statistically assess the level  
56 of heterogeneity, while sensitivity and subgroup analyses serve to identify potential causes of  
57 heterogeneity. Subgroup analyses will be conducted for vitamin D<sub>3</sub> dosing, follow-up time, age, sex,  
58 obesity, vitamin D deficiency/insufficiency, history of cancer, and compliance. Publication bias will  
59 be assessed by funnel plots and Egger's test.

1  
2 **60 Ethics and dissemination**  
3  
4

5 61 Ethical approval is not required since no human beings are involved in this systematic review.  
6

7 62 Results will be published in a peer-reviewed journal with open access. They will be presented at  
8  
9 63 conferences and sent to patient advocacy groups and German oncologic rehabilitation centers.  
10  
11

12 **64 PROSPERO registration number**  
13  
14

15 65 CRD42020185566  
16  
17

18 **66 Keywords**  
19  
20

21 67 Vitamin D, cancer, mortality, systematic review, meta-analysis  
22  
23

24 68  
25  
26

27 **69 Strengths and limitations of this study**  
28  
29

30 70 • First meta-analysis on vitamin D<sub>3</sub> supplementation and cancer survival as well as first individual  
31  
32 71 patient data meta-analysis on this research topic.  
33  
34

35 72 • Results of subgroup analyses based on individual patient data allow fundamental insights for  
36  
37 73 personalized medicine and may be used as guidance for future clinical trials targeting cancer  
38  
39 74 patients that presumably profit most from vitamin D supplementation  
40  
41

42 75 • Conduction of the systematic review according to this protocol and a thorough assessment of  
43  
44 76 study quality, sources of heterogeneity, and bias in meta-analyses minimize the risk of bias and will  
45  
46 77 gather reproducible results.  
47  
48

49  
50 78 • Number of studies with eligible data for subgroup analyses may be limited.  
51  
52  
53  
54  
55  
56  
57  
58  
59  
60

## 79 INTRODUCTION

### 80 Background

81 The global cancer burden is estimated to have risen to 18.1 million new cases and 9.6 million deaths  
82 in 2018.(1) There is accumulating evidence from epidemiological studies that a low vitamin D status  
83 goes along with increased risks of several types of cancer. Meta-analyses of observational studies  
84 reported increased risks of lung cancer, colorectal cancer, breast cancer, bladder carcinoma, and  
85 lymphoma in subjects with low 25(OH)D serum concentrations.(2-5) Furthermore, epidemiological  
86 studies have shown that low serum levels of 25-hydroxyvitamin D (25(OH)D), the acknowledged  
87 best biomarker to measure vitamin D status, were strongly associated with substantially increased  
88 cancer mortality.(6) For example, in a German population-based cohort study of older adults, the  
89 risk to die of cancer was increased by 42% in study participants with vitamin D deficiency (defined  
90 as 25(OH)D < 30 nmol/L) compared to individuals with sufficient 25(OH)D levels > 50 nmol/L (hazard  
91 ratio [HR] and 95% confidence interval (95%CI): 1.42 [1.08; 1.87]).(7)

92 The molecular links between vitamin D and carcinogenesis and progression have been previously  
93 described.(8) In brief, genomic mechanisms of the active hormone 1,25(OH)<sub>2</sub>D impact signaling  
94 pathways that regulate cell proliferation, differentiation, and cell survival. 1,25(OH)<sub>2</sub>D may primarily  
95 act as an anti-proliferative agent in many tissues and may slow down malignant cellular growth.  
96 Thus, there is biological plausibility that a sufficient vitamin D supply is especially essential for a  
97 good cancer prognosis. A causal relationship of low 25(OH)D levels and cancer mortality was  
98 furthermore supported by a Mendelian randomization study conducted within three large cohorts  
99 from Denmark.(9)

100 Several randomized trials with vitamin D supplementation have been conducted with mostly the aim  
101 to improve skeletal outcomes at older ages. Cancer mortality was a secondary outcome in all trials  
102 and therefore the trials were not specifically designed for this outcome.(10) Despite strong  
103 heterogeneity in study populations, intervention schemes, and other important design aspects, three  
104 out of four meta-analyses demonstrated a statistically significant reduction in cancer mortality.(11-  
105 15)

1  
2 106 However, most trials have not been restricted to patients that were vitamin D deficient.(10) The latter  
3  
4 107 is important because the association of 25(OH)D levels and adverse health outcomes is not linear.(6)  
5  
6 108 Neglecting this dose-response relationship by treating subjects without hypovitaminosis D is  
7  
8 109 expected to have led to a substantial underestimation of the potential efficacy of vitamin D  
9  
10 110 supplementation in previous clinical trials.(16) Therefore, there is a need for a systematic review that  
11  
12 111 re-analyses individual patient data (IPD) from previous trials restricted to subjects with vitamin D  
13  
14 112 insufficiency (25(OH)D < 50 nmol/L) or deficiency (25(OH)D < 30 nmol/L).

16  
17  
18 113 Another important reason to re-analyze the previous trial data is that most studies were not restricted  
19  
20 114 to cancer patients. Vitamin D deficiency or insufficiency are much more common among cancer  
21  
22 115 patients than among the general population. In a study with 2,912 colorectal cancer patients, vitamin  
23  
24 116 D deficiency (25(OH)D levels < 30 nmol/L) was found among 59% of colorectal cancer patients  
25  
26 117 during or shortly after first-line treatment, and, in agreement with previous evidence, low 25(OH)D  
27  
28 118 levels were strongly associated with poorer survival.(17, 18) Systematic reviews of observational  
29  
30 119 studies on 25(OH)D levels and cancer prognosis concluded that sufficient 25(OH)D levels are  
31  
32 120 associated with a better prognosis of breast and colorectal cancer, whereas there are too few studies  
33  
34 121 for other cancer sites up to date to draw conclusions.(17, 19)

36  
37  
38 122 Further important potential effect modifiers that deserve close investigation are obesity and  
39  
40 123 compliance. People with low compliance and/or obesity, who may need higher vitamin D doses  
41  
42 124 because vitamin D is stored in adipocytes, might have attenuated the overall treatment effect in the  
43  
44 125 trials.(20)

## 50 127 **Objective**

51  
52  
53 128 The objective of our systematic review is to assess the efficacy of vitamin D<sub>3</sub> supplementation on  
54  
55 129 cancer mortality in the general population and the prognosis of cancer patients with special attention  
56  
57 130 to potential effect modifiers, including baseline 25(OH)D levels, cancer at baseline, BMI and  
58  
59 131 compliance.



1  
2 132 The main outcomes include “cancer mortality in the general population”, “cancer-specific survival of  
3  
4 133 cancer patients” and “overall survival of cancer patients”. These outcomes are universally used in  
5  
6 134 cancer studies and do not need further refinement during the review.  
7  
8

9 135 In a first step, we intend to update the previous systematic reviews on vitamin D supplementation  
10  
11 136 and cancer mortality in the general population by including newly published trials and unpublished  
12  
13 137 data from trials with outcome data on cancer incidence or all-cause mortality by asking the authors  
14  
15 138 for data on cancer mortality. Second, we will obtain data for an IPD meta-analysis. Third, we will  
16  
17  
18 139 conduct IPD meta-analyses on vitamin D<sub>3</sub> supplementation and overall and cancer-specific survival  
19  
20 140 among cancer patients. Forth, we will conduct subgroup analyses to explore sources of  
21  
22 141 heterogeneity and to identify effect modifiers. The timetable for the review is shown in Table 1.  
23  
24

25 142 **Table 1:** Proposed timetable for conducting the review  
26

| Step                                                  | Timeframe for completion |
|-------------------------------------------------------|--------------------------|
| Literature search, abstract and full-text selection   | 2.5 months               |
| Data extraction & individual patient data acquisition | 2.5 months               |
| Quality appraisal                                     | 2 months                 |
| Data analysis & meta-analysis                         | 3 months                 |
| Writing of manuscript                                 | 2 months                 |
| <b>Total</b>                                          | <b>12 months</b>         |

27  
28  
29  
30  
31  
32  
33  
34  
35  
36  
37  
38  
39 143  
40  
41

## 42 144 **METHODS AND ANALYSIS**

### 43 44 45 145 **Study selection criteria/ Eligibility criteria**

46  
47  
48  
49 146 We will follow a two-step approach for the study selection: First, all trials will be selected that could  
50  
51 147 potentially have published or unpublished data on the research topic. All authors of trials with  
52  
53 148 potentially unpublished data on cancer mortality/survival will be contacted to provide data. In the  
54  
55 149 second step, only trials with eligible data for a meta-analysis will be included.  
56  
57  
58  
59  
60

## **Step 1: Inclusion criteria for trials**

**Participants:** We will include studies investigating the adult population (18 years or older). We will also include studies conducted solely with cancer populations or patients with other conditions (e.g. studies that recruited only patients with type 2 diabetes).

**Interventions:** We will focus on trials that used vitamin D<sub>3</sub> in any dose and any regimen (e.g. daily/weekly/monthly intake) as the intervention. However, the minimum time of the intervention shall be six months to exclude studies with one-time bolus interventions or very short intervention periods. The first reason is that cancer mortality is highly unlikely to be influenced by very brief intervention periods. The second reason is that after initiating daily, weekly, or monthly supplementation schedules, it takes three to six months for 25(OH)D levels to reach homeostasis.

Besides, we will also include studies using vitamin D<sub>3</sub> bioequivalent substances such as calcitriol, being the active vitamin D hormone 1,25(OH)<sub>2</sub>D, as well as alfacalcidol and calcifediol, which are both equally metabolized to 1,25(OH)<sub>2</sub>D.

We will exclude studies with vitamin D<sub>2</sub> supplementation since the Cochrane review of Bjelakovic et al. and other recent data showed clearly no efficacy on mortality.(10, 11, 15, 21) Co-supplementation with calcium or other dietary supplements in the intervention arm will not be an exclusion criterion. A sensitivity analysis will elucidate whether the inclusion of these studies had an impact on the overall effect estimate of the meta-analysis.

**Comparators:** We will include only studies, which used placebo as the comparator.

**Outcomes:** To be eligible for inclusion in a meta-analysis trials need to have assessed the outcome of cancer mortality, cancer survival, or cancer-specific survival. In an intermediate step of the systematic review, we will also record studies with the outcomes of cancer incidence or all-cause mortality and contact the authors if they have data for the outcomes needed for the planned meta-analyses. The definitions of all outcomes are shown in Table 2.

**Table 2:** Definition of outcomes

| Outcome                  | Definition                                                                                                                                  |
|--------------------------|---------------------------------------------------------------------------------------------------------------------------------------------|
| All-cause mortality      | Rate of deaths during a specific time period in a population at risk                                                                        |
| Cancer mortality         | Rate of cancer deaths during a specific time period in a population at risk                                                                 |
| Cancer incidence         | Rate of newly diagnosed cancer cases during a specific time period in a population at risk                                                  |
| Overall cancer survival  | Proportion of patients from a cancer population at risk alive at some point subsequent to the diagnosis of their cancer                     |
| Cancer-specific survival | Proportion of patients from a cancer population at risk who did not die of cancer at some point subsequent to the diagnosis of their cancer |

175

Study design: We will include RCTs in which, analogous to the intervention period, the follow-up period is at least six months. The follow-up time should not be longer than the time under treatment. We will focus on parallel-group designs and exclude single-arm studies. We will further exclude all types of cohort studies and case-control studies as well as the following types of records: reviews, dissertations, theses, editorials, study protocol, clinical guidelines, commentaries, and letters.

Setting: There will be no restrictions by type of setting.

Minimum sample size: The studies need to have at least one cancer death in the verum and placebo group.

Geographical location: No restrictions are defined regarding the geographical location.

## **Step 2: Inclusion criteria for pooling in meta-analysis**

Studies will be included for pooling in the meta-analysis, if the risk ratio and 95% confidence interval for at least one outcome of interest (cancer mortality in the general population, cancer-specific survival of cancer patients, or overall survival of cancer patients) were either reported in the publication or could be obtained from authors or individual participant data. In the case of double publication from the same trial, only the publication with the largest amount of information, e.g. the longest follow-up, will be included in the meta-analysis.

## 193 Information sources and search strategy

194 The search strategy will be elaborated by SK, BS, and A. Heppert. Mrs. Heppert is a specialist for  
195 systematic bibliographic searches at the Central Library of the German Cancer Research Center  
196 and is not otherwise associated with the project. Finally, it will be peer-reviewed by HB and carried  
197 out by SK.

198 The bibliographic databases MEDLINE (Pubmed interface), ISI Web of Science (WoS; Clarivate  
199 Analytics interface), and the Cochrane Central Register of Controlled Trials (CENTRAL; OVID  
200 interface) will be searched systematically. We will also carry out a systematic search for previous  
201 systematic reviews in the Cochrane Database of Systematic Reviews (CDRS, OVID interface) and  
202 KSR Evidence (<https://ksevidence.com>), which are both specialized search engines for systematic  
203 reviews. RCTs included in meta-analyses on the topics vitamin D supplementation and cancer  
204 mortality, cancer incidence, all-cause mortality, or cancer survival will be extracted and merged with  
205 the hits found in the bibliographic database search. The electronic database search will be  
206 complemented by searching the WHO's International Clinical Trials Research Portal (ICTRP) and  
207 [clinicaltrials.gov](http://clinicaltrials.gov) to capture results from ongoing or recently completed RCTs that have not been  
208 published in scientific journals, yet. We will also scan the reference lists of eligible studies to yield  
209 additional trial articles via cross-referencing. A draft of the search strategy is presented in Figure 1.

210 We will search in MEDLINE, ISI WoS, and CENTRAL for medical subject headings (MeSH), free text  
211 words, synonyms, and related search terms for the concepts "vitamin D", "mortality", "cancer",  
212 "randomized controlled trial" and "placebo". Besides, standard search terms for RCTs will be used  
213 additionally wherever available. No restrictions are planned in the search strategy to prevent  
214 overlooking important studies that have not been correctly classified in the respective bibliographic  
215 databases. All databases will be searched from the inception of the databases without time  
216 restriction. Moreover, we will not limit the search to studies in English as relevant studies might also  
217 be published in other languages. The search string for MEDLINE is shown in Table 3.

1  
2 218 **Table 3:** Search string for MEDLINE

| Step | Search string                                                                                                                                                                                                                                                                                                                                                                                                                                               |
|------|-------------------------------------------------------------------------------------------------------------------------------------------------------------------------------------------------------------------------------------------------------------------------------------------------------------------------------------------------------------------------------------------------------------------------------------------------------------|
| 1    | "vitamin d"[tw] OR "vitamin D"[MeSH] OR cholecalciferol[MeSH] OR cholecalciferol*[tw] OR calciol[tw] OR hydroxycholecalciferols[MeSH] OR hydroxycholecalciferol*[tw] OR dihydroxycholecalciferol*[tw] OR "vitamin d3"[tw] OR "vitamin d 3"[tw] OR calcitriol[MeSH] OR calcitriol[tw] OR "1-hydroxycholecalciferol"[tw] OR calcifediol[MeSH] OR calcifediol[tw] OR calcidiol[tw] OR alfalcidol[Supplementary Concept] OR alphacalcidol[tw] OR alfalcidol[tw] |
| 2    | mortality[tw] OR mortality[MeSH] OR death[MeSH] OR death[tw] OR died[tw] OR dead[tw] OR survival[tw] OR surviv*[tw] OR survival[MeSH]                                                                                                                                                                                                                                                                                                                       |
| 3    | neoplasms[MeSH] OR neoplas*[tw] OR malignanc*[tw] OR cancer*[tw] OR tumor*[tw] OR tumour*[tw] OR carcinoma*[tw]                                                                                                                                                                                                                                                                                                                                             |
| 4    | (((((("randomized controlled trial"[pt]) OR "controlled clinical trial"[pt]) OR randomized[tiab]) OR placebo[tiab]) OR "drug therapy"[sh]) OR randomly[tiab]) OR trial[tiab]) OR groups[tiab])) NOT ((animals[mh] NOT humans[mh]))                                                                                                                                                                                                                          |
| 5    | placebos[MeSH] OR placebo[tw]                                                                                                                                                                                                                                                                                                                                                                                                                               |
| 6    | 2 OR 3                                                                                                                                                                                                                                                                                                                                                                                                                                                      |
| 7    | 1 AND 4 AND 5 AND 6                                                                                                                                                                                                                                                                                                                                                                                                                                         |

25 219  
26  
27  
28 220 A shortened version of the MEDLINE search string will be used to search for systematic reviews in  
29  
30 221 CDSR and KSR Evidence. Only the first three search steps are needed because the study design is  
31  
32 222 "systematic review" and not "placebo-controlled RCT". The search string for CDSR is shown in Table  
33  
34 223 4. The literature search will be updated during the peer-review process of the publication in order to  
35  
36 224 include the most up to date literature.

38  
39  
40 225 **Table 4:** Search string for the Cochrane Database of Systematic Reviews

| Step | Search string                                                                                                                                                                                                                                                                                                                                                                                                                                                                                                                                                                                                                                                                                                                                                           |
|------|-------------------------------------------------------------------------------------------------------------------------------------------------------------------------------------------------------------------------------------------------------------------------------------------------------------------------------------------------------------------------------------------------------------------------------------------------------------------------------------------------------------------------------------------------------------------------------------------------------------------------------------------------------------------------------------------------------------------------------------------------------------------------|
| 1    | #1 MeSH descriptor: [Vitamin D] explode all trees<br>#2 MeSH descriptor: [Cholecalciferol] explode all trees<br>#3 MeSH descriptor: [Calcifediol] explode all trees<br>#4 MeSH descriptor: [Calcitriol] explode all trees<br>#5 MeSH descriptor: [Hydroxycholecalciferols] explode all trees<br>#6 (("alfalcidol") OR ("alphacalcidol") OR ("hydroxycholecalciferol*") OR ("1- hydroxycholecalciferol") OR ("hydroxyvitamin* D") OR ("calcifediol") OR ("calcidiol") OR ("calcitriol") OR ("dihydroxycholecalciferol*") OR ("dihydroxyvitamin d*") OR ("vitamin D") OR (cholecalciferol*) OR ("vitamin D3") OR ("vitamin D 3") OR ("calciol")) (Word variations have been searched)<br>#7 ("vitamin d*"):ti,ab,kw (Word variations have been searched)<br>#8 {OR #1-#7} |
| 2    | #9 MeSH descriptor: [Mortality] explode all trees<br>#10 MeSH descriptor: [Death] explode all trees<br>#11 MeSH descriptor: [Survival] explode all trees                                                                                                                                                                                                                                                                                                                                                                                                                                                                                                                                                                                                                |

|   |     |                                                                                                             |
|---|-----|-------------------------------------------------------------------------------------------------------------|
|   | #12 | ("mortality" OR "dea*" OR "died" OR "survival" OR "surviv*") (Word variations have been searched)           |
|   | #13 | {OR #9-#12}                                                                                                 |
| 3 | #14 | MeSH descriptor: [Neoplasms] explode all trees                                                              |
|   | #15 | (carcinoma* OR tumour* OR tumor* OR cancer* OR malignanc* OR neoplas*) (Word variations have been searched) |
|   | #16 | #14 OR #15                                                                                                  |
| 4 | #17 | #13 OR #16                                                                                                  |
| 5 | #18 | #8 AND #17 in Cochrane Reviews (Word variations have been searched)                                         |

## Data collection and management

Study selection and data extraction will be performed in duplicate by two reviewers. Both are blinded to each other's decision but not to journal titles, study authors, or institutions. The screening will be conducted by entering data into blank Microsoft Word or Excel spreadsheets. The software EndNote will be used to store, organize, and manage all the references and allow a transparent and reproducible systematic search. To assure validity and high quality of the data, the data extraction will be performed by using standard and predefined data extraction forms (see Appendix 1). Both reviewers will scan independently the titles and abstracts of studies obtained by the aforementioned search strategy against the eligibility criteria. For those studies that meet the inclusion criteria or that cannot yet be fully excluded, full-text reports will be acquired and screened again towards the inclusion criteria. In the next step, the results of both reviewers will be compared and in cases of disagreement, critical points will be discussed until a consensus is reached. If necessary, we will contact study authors to resolve questions about eligibility. We will document the reasons for excluding trials.

After completing the abstract and full-text selection with eligible studies, the two reviewers will extract independently the pre-defined data (see Appendix 1). Extracted items will include first author, publication year, country, number of participants, general population or medical condition (including cancer site and stage(s)), sex, mean/median age, race/ethnicity, mean/median BMI, mean/median 25(OH)D levels at baseline, vitamin D<sub>3</sub> dosing regimen, duration of vitamin D<sub>3</sub> supplementation,

1  
2 247 compliance, mean/median and maximum follow-up time, number of cancer deaths and effect  
3  
4 248 estimates (including confidence intervals) reported for cancer mortality/cancer survival. Individual  
5  
6 249 patient data for the aforementioned variables will be obtained from all trials with at least 20 cancer  
7  
8 250 deaths (see Appendix 1). If summary data are not published, they shall be calculated from the  
9  
10 251 obtained data. All authors will be contacted by e-mail with a maximum of three attempts sent at two-  
11  
12 252 week intervals.

14  
15  
16 253 For the meta-analyses on cancer survival and cancer-specific survival, we will ask all authors who  
17  
18 254 conducted trials in the general population to provide IPD for cancer diagnoses in the five years prior  
19  
20 255 to baseline and during the trial (including cancer site with ICD-code, stage, and diagnosis date). The  
21  
22 256 following IPD will be additionally collected: age, sex, BMI, race/ethnicity, baseline 25(OH)D levels,  
23  
24 257 compliance, randomization group allocation, baseline date, deaths during follow-up with date, cancer  
25  
26 258 deaths with date, censoring dates for survival outcomes, and censoring date for patients not dying  
27  
28 259 of cancer (see Appendix 1). If IPD cannot be shared, the authors of the studies will be asked to  
29  
30 260 conduct the analyses in-house and to provide the summary estimates for the meta-analysis. If trial  
31  
32 261 authors do not collaborate, their study cannot be included in subgroup analyses for which no effect  
33  
34 262 estimates were published but the result from the total trial population will remain included in the main  
35  
36 263 meta-analysis.

38  
39  
40 264

## 41 42 43 265 **Quality assessment**

44  
45  
46 266 The protocol of the systematic review with all planned statistical analyses has been registered in  
47  
48 267 PROSPERO before data collection to preclude data-driven analyses and selective reporting of only  
49  
50 268 statistically significant findings. The study protocol has been developed in line with the “Preferred  
51  
52 269 reporting items for systematic review and meta-analysis protocols” (PRISMA-P, see Appendix 2),  
53  
54 270 the Cochrane Handbook for Systematic Reviews of Interventions as well as the Institute of Medicine  
55  
56 271 guideline.(22-25) We will ensure to fulfill all requirements recommended by the current PRISMA  
57  
58 272 guideline when writing the publication of the systematic review.(26, 27)

60

1  
2 273 The Cochrane risk-of-bias tool for randomized trials (RoB 2) will be used to assess various domains  
3  
4 274 of bias including aspects of trial design, conduct, and reporting (see Appendix 1).(28, 29) The  
5  
6 275 following domains will be covered during the evaluation: sequence generation, allocation  
7  
8 276 concealment, blinding, incomplete outcome data (e.g. withdrawals and dropouts), and selective  
9  
10 277 outcome reporting. A summary assessment will be made based on the extracted items, judging  
11  
12 278 whether the risk of bias in the respective study is low, high, or has some concerns. If only insufficient  
13  
14 279 data is reported, the risk of bias is “unclear” and the original study authors will be contacted for further  
15  
16 280 information. The assessment will be conducted by two independent reviewers using the RoB 2  
17  
18 281 tool.(28, 29) In cases of disagreement, critical points will be discussed until a consensus is reached.  
19  
20 282 The risk of bias evaluation will be incorporated into the data synthesis by performing a sensitivity  
21  
22 283 analysis that excludes studies with high or unknown risk of bias.  
23  
24  
25 284

## 27 285 **Descriptive analysis and meta-analysis**

### 29 286 Measures of treatment effect

31 287 The mortality/survival outcomes shall be addressed by estimating hazard ratios (HR) and 95%  
32  
33 288 confidence intervals (95%CI). Results of the intention-to-treat (ITT) approach will be used, including  
34  
35 289 all patients randomized when both ITT and per-protocol results are given.  
36  
37

### 39 290 Data synthesis

42 291 As far as study quality and differences between studies allow, effect estimates of all eligible studies  
43  
44 292 with data for the following three main meta-analyses will be pooled deriving random effects results  
45  
46 293 with the DerSimonian and Laird method (primary analysis) and fixed effects summary estimates  
47  
48 294 using the Mantel-Haenzel method (secondary analysis).

- 50 295 1) Association of vitamin D<sub>3</sub> supplementation and cancer mortality in the general population
- 52 296 2) Association of vitamin D<sub>3</sub> supplementation and cancer-specific survival of cancer patients
- 54 297 3) Association of vitamin D<sub>3</sub> supplementation and overall survival of cancer patients

56 298 For all studies that provide IPD, unadjusted Cox proportional hazard regression models will be used  
57  
58 299 to estimate HRs and 95%CIs for the main meta-analyses in which we will pool effect size data from  
59  
60 300 studies who do and who do not provide IPD in a two-step approach. For studies that cannot send



1  
2 301 IPD to the coordinating center (German Cancer Research Center, Heidelberg), authors are being  
3  
4 302 asked to estimate the HRs and 95% CIs themselves and send the summary data for the meta-  
5  
6 303 analyses. To assess cancer survival as time-to-event data from general population cohorts, the study  
7  
8 304 will be restricted to patients with a history of cancer in the five years preceding baseline or a cancer  
9  
10 305 diagnosis during the trial. For the former, the survival time will be calculated from baseline to  
11  
12 306 death/end of the trial, and for the latter, survival time will be counted from the date of cancer diagnosis  
13  
14 307 till death/end of the trial.  
15  
16

17  
18 308 With all studies that agree to send IPD data to the coordinating center or to do additional analyses  
19  
20 309 in-house, we will also conduct an additional multivariate Cox proportional hazards regression model.  
21  
22 310 The model for the outcome cancer mortality among general population studies will contain the  
23  
24 311 variables vitamin D<sub>3</sub> intervention (vs. placebo), age (continuous; < 70 vs. ≥ 70 years), sex (male,  
25  
26 312 female, unknown), BMI (< 25 vs. 25 – 29.9 vs. ≥ 30 kg/m<sup>2</sup> vs. unknown), ethnicity (white vs.  
27  
28 313 black/brown vs. other), 25(OH)D baseline level (< 30 vs. 30 – 49.9 nmol/L vs. ≥ 50 nmol/L vs.  
29  
30 314 unknown), diagnosis of cancer (except non-melanoma skin cancer and benign tumors) in five years  
31  
32 315 before baseline (yes vs. no vs. unknown), health status (general healthy population vs. diseased  
33  
34 316 population), and compliance (< 80% vs. ≥ 80% vs. unknown). The models for the outcomes overall  
35  
36 317 and cancer-specific survival of cancer patients will be adjusted for the same variables but the variable  
37  
38 318 “diagnosis of cancer in five years before baseline” will be replaced by more specific variables for  
39  
40 319 cancer stage (only advanced stages III and/or IV vs. unknown), cancer site (prostate vs. colorectal  
41  
42 320 vs. breast vs. lung vs. other vs. unknown) and time since cancer diagnosis (<1 year vs. 1-5 years).  
43  
44 321 We will test for interactions of the treatment variable (vitamin D<sub>3</sub> vs. placebo) with these covariates  
45  
46 322 to identify potential effect modifiers. Again, a two-step approach will be used for the meta-analyses,  
47  
48 323 whereby the analyses are carried out on a study-specific basis, and then the effect estimates are  
49  
50 324 pooled. To further explore the variation of the treatment effect by methodological or patient  
51  
52 325 characteristics differences of the studies, the following subgroup analyses will be performed with IPD  
53  
54 326 data and studies that published eligible data:  
55  
56

57  
58  
59 327 Subgroup analyses according to trial design  
60

- 1  
2 328 - Daily dose vs. weekly/monthly bolus dose vs. bolus dose at the beginning of the trial followed  
3  
4 329 by a daily dose  
5  
6 330 - Low vs. moderate vs. high vitamin D<sub>3</sub> dosing (< 1,000 IU vs. 1,000 – 2,000 IU vs. > 2,000 IU  
7  
8 331 per day or equivalent weekly or monthly taken dose)  
9  
10 332 - Vitamin D<sub>3</sub> supplementation duration (< 5 vs. ≥ 5 years)  
11  
12 333 - Health status (general population vs. diseased population)  
13  
14 334 - Region (North America vs. Europe vs. Other)  
15  
16

17  
18 335 Subgroup analyses according to patient characteristics

- 19  
20 336 - Age (< 70 vs. ≥ 70 years)  
21  
22 337 - Sex (male vs. female)  
23  
24 338 - Ethnicity (white vs. black/brown vs. other)  
25  
26 339 - BMI (< 25 vs. 25 – 29.9 vs. ≥ 30 kg/m<sup>2</sup>)  
27  
28 340 - Baseline 25(OH)D levels (< 30 vs. 30 – 49.9 nmol/L vs. ≥ 50 nmol/L)  
29  
30 341 - Compliance rate (< 80% vs. ≥ 80%)  
31  
32

33  
34 342 For meta-analyses conducted in cancer patients in addition:

- 35  
36 343 - Cancer stage (only advanced stages III and/or IV vs. unknown)  
37  
38 344 - Cancer site (prostate vs. colorectal vs. breast vs. lung vs. other)  
39  
40 345 - Time since cancer diagnosis (<1 year vs. 1-5 years)  
41

42  
43 346 Analyses in the coordinating center will be done with the statistical software SAS 9.4. The meta-  
44  
45 347 analyses will be performed with Comprehensive Meta-Analysis 2.0 (Biostat, Englewood, NJ).  
46

47  
48 348 Assessment of heterogeneity

49  
50  
51 349 Heterogeneity will be presented visually by forest plots and assessed statistically by Cochran's Q  
52  
53 350 test (significance level = 0.05) as well as the I<sup>2</sup> index (< 25% low, 25-50% moderate, > 50% high  
54  
55 351 heterogeneity). Meta-Analyses will be conducted even if high heterogeneity is being detected and  
56  
57 352 the results will be discussed taking the heterogeneity into consideration. Sources of heterogeneity  
58  
59  
60

1  
2 353 will be explored by the subgroup analyses outlined in the previous section and the following  
3  
4 354 sensitivity analyses:

- 6 355 - Excluding studies with a high or unknown risk of bias according to assessment with the  
7  
8 356 Cochrane risk-of-bias tool for randomized trials
- 10 357 - Excluding studies not reporting ITT results
- 12 358 - Excluding trials with co-supplementation of calcium
- 14  
15 359 - Excluding events in the first year of follow-up

#### 17 18 360 Assessment of publication bias

19  
20  
21 361 Publication bias will be assessed visually in funnel plots and tested for with Egger's test.

#### 22 23 24 362 Dealing with missing data

25  
26  
27 363 In case of missing data, we will seek contact with the original investigators. If possible, we will  
28  
29 364 calculate missing numerical data from the given reported data.

#### 30 31 32 365 Strength of the body of evidence

33  
34  
35 366 The quality of the evidence for each outcome will be evaluated using the Grading of  
36  
37 367 Recommendations Assessment, Development and Evaluation (GRADE) approach. The four levels  
38  
39 368 of evidence comprise very low, low, moderate, and high. Evidence from RCTs starts as high quality  
40  
41 369 but can be decreased for reasons such as the risk of bias, imprecision, inconsistency, indirectness,  
42  
43  
44 370 and publication bias.

#### 45 46 47 371 **Amendments**

48  
49  
50 372 In the case of protocol amendments, we will document the date, the description of the change, and  
51  
52 373 the rationale in a pre-defined log sheet in Microsoft Word or Excel.

53  
54  
55 374

56  
57  
58  
59  
60

## 375 Patient and public involvement

376 Patients and the public were not involved in the development of the study design. Since this is a  
377 protocol for a systematic review and no participant recruitment will take place, the involvement of  
378 patients in the recruitment, the conduct of the study and the dissemination of findings to study  
379 participants are not applicable.

## 381 Ethics and dissemination

382 An ethics approval is not required for this systematic review because it is only a summary of already  
383 published trial data. All studies to be included in the systematic review have their own ethics  
384 approvals, which are named in the original publications. For the IPD meta-analysis, we will take care  
385 that the additional analyses are in adherence with the ethics approvals of the trials.

386 The systematic review will be published in an international peer-reviewed journal for clinical oncology  
387 or general medicine with open access option and presented in national and international meetings.  
388 If the meta-analyses of the systematic review obtain statistically significant findings, we expect the  
389 result to be reflected in national and international guidelines and to change the current practice of  
390 tertiary prevention among cancer patients. Vitamin D<sub>3</sub> is already on the market in various doses and  
391 at low costs because it is not patented.

392 Patients will be informed via a press release from the German Cancer Research Center. Moreover,  
393 we will send a summary of the results in a language suitable for laypersons to all patient advocacy  
394 groups recommended by the Cancer Information Service of the German Cancer Research Center  
395 (up to data n = 30) for further dissemination among their members.(30) With respect to oncologists,  
396 we will disseminate the results to all German rehabilitation centers having a ward for oncologic  
397 rehabilitation, as listed in the register of the *Bundesarbeitsgemeinschaft für Rehabilitation e.V.*(31)  
398 As the topic of the review is in the field of tertiary prevention, oncologists in the rehabilitation setting  
399 are the target audience for information dissemination.

1  
2 400 **DISCUSSION**

3  
4  
5 401 One of the strengths of this systematic review comprises the first meta-analysis on vitamin D  
6  
7 402 supplementation and cancer survival and additionally the first IPD meta-analysis on this research  
8  
9 403 topic. The IPD meta-analysis will allow the investigation of potential effect modifiers. Especially  
10  
11 404 25(OH)D levels at baseline, BMI, and compliance are candidates that could have had a great impact  
12  
13 405 on the overall trial results.

14  
15  
16 406 The creation of this research protocol prompted us to plan carefully all the details of the systematic  
17  
18 407 review and to anticipate and address potential problems before their actual occurrence. Arbitrary  
19  
20 408 decision making concerning any procedure of this systematic review is prevented, resulting again in  
21  
22 409 a decreased risk of publication bias and selective reporting bias. The protocol allows reproducible  
23  
24 410 and transparent research for future reviewers.

25  
26  
27  
28 411 Possible limitations of our review include a potentially insufficient number of cancer deaths in the  
29  
30 412 studies and high heterogeneity, which could both negatively influence the statistical power of the  
31  
32 413 meta-analyses. However, it is still too early to judge whether these limitations occur.

33  
34  
35 414 The quality of selected studies will be assessed and the quality of the evidence will be judged. The  
36  
37 415 ultimate goal is to ensure the reporting of highly meaningful findings for clinicians and patients.  
38  
39 416 Oncologists are well aware that vitamin D deficiency and insufficiency are very common in cancer  
40  
41 417 patients but there is uncertainty about whether and how they should routinely perform preventive  
42  
43 418 screening and treatments. In some clinics, cancer patients receive a uniform dose of vitamin D with  
44  
45 419 a “one-dose-fits-all” approach, which does not take individual 25(OH)D levels or other patient  
46  
47 420 characteristics into account. The optimal dose for one person may be utterly insufficient for another  
48  
49 421 one to achieve beneficial vitamin D levels. Since vitamin D products are readily available in  
50  
51 422 pharmacies or drug stores, many patients use low-dose vitamin D supplementation as self-  
52  
53 423 medication. Yet, it can be doubted whether this untargeted intervention has any effect on cancer  
54  
55 424 prognosis. Consequently, evidence-based recommendations for high-dose vitamin D  
56  
57 425 supplementation are highly relevant for both, clinicians and patients.

58  
59  
60

1  
2 426 If the planned systematic review determines the efficacy of vitamin D supplementation on cancer  
3  
4 427 prognosis in the expected magnitude of 10-15%, the review will be used to provide clear suggestions  
5  
6 428 on how vitamin D can be appropriately dosed to overcome vitamin D deficiency or insufficiency in  
7  
8 429 cancer patients.(12) Furthermore, our systematic review would provide the evidence for statutory  
9  
10 430 health insurances to cover the costs for screening for vitamin D deficiency or insufficiency in cancer  
11  
12 431 patients and a subsequent vitamin D supplementation. With expected relatively large effects and  
13  
14 432 very low screening and treatment costs (A vitamin D blood test costs approx. € 20, and one year of  
15  
16 433 vitamin D therapy costs less than € 100.), vitamin D supplementation will be highly cost-effective.  
17  
18  
19 434 The costs would be close to negligible compared to other current cancer treatment costs.  
20  
21 435

### 22 23 436 **Status**

24  
25 437 At the time of submission, the study selection for the systematic review has not started.  
26  
27 438

### 28 29 439 **Acknowledgements**

30  
31 440 The authors thank the Helmholtz International Graduate School for Cancer Research (HIGS) at the  
32  
33 441 German Cancer Research Center, Heidelberg, for supporting this research with a doctoral  
34  
35 442 scholarship to Sabine Kuznia.  
36  
37  
38 443

### 39 40 444 **Authors' contribution**

41  
42 445 All authors meet the ICMJE criteria for authorship as follows: BS and SK are the guarantors of the  
43  
44 446 systematic review, therefore, are accountable for all aspects of the work in ensuring that questions  
45  
46 447 related to the accuracy or integrity of any part of the work are appropriately investigated and resolved.  
47  
48 448 All authors made substantial contributions to the conception of the work. BS and SK designed the  
49  
50 449 search strategy and the risk of bias assessment strategy. BS developed the selection criteria, the  
51  
52 450 data extraction criteria, and the statistical methods. SK drafted the protocol publication, which BS  
53  
54 451 and HB revised critically for important intellectual content. All authors approved the final version to  
55  
56  
57 452 be published.  
58  
59 453  
60

1  
2 454 **Contributors**

3  
4 455 The following researchers have agreed to contribute to this systematic review by sharing IPD and  
5  
6 456 giving intellectual input for the discussion of the results: Taisuke Akutsu (Jikei University School of  
7  
8 457 Medicine. Tokyo, Japan), Professor Julie E. Buring (ScD. Brigham and Women's Hospital and  
9  
10 458 Harvard Medical School. Boston), Professor Carlos A. Camargo Jr (MD, DrPH. Massachusetts  
11  
12 459 General Hospital, Harvard Medical School. Boston), Professor Nancy R. Cook (ScD. Brigham and  
13  
14 460 Women's Hospital and Harvard Medical School. Boston), Professor I-Min Lee (MB, BS, ScD.  
15  
16  
17 461 Brigham and Women's Hospital and Harvard Medical School. Boston), Professor JoAnn E. Manson  
18  
19 462 (MD, Dr. PH. Brigham and Women's Hospital and Harvard Medical School. Boston), Professor  
20  
21 463 Robert Scragg (MBBS, PhD. School of Population Health, University of Auckland. Auckland, New  
22  
23 464 Zealand), John Sluyter (PhD. School of Population Health, University of Auckland. Auckland, New  
24  
25 465 Zealand), Professor Mitsuyoshi Urashima (MD. Jikei University School of Medicine. Tokyo, Japan),  
26  
27 466 Professor Jean Wactawski-Wende (PhD. University at Buffalo. Buffalo, New York).

28  
29 467  
30  
31 468 **Funding**

32  
33 469 A grant proposal has been submitted to the German Federal Ministry of Education and Research  
34  
35 470 (BMBF). The German Cancer Research Center is the sponsor. Neither funder nor sponsor will have  
36  
37  
38 471 a role in the design of the review protocol, data collection, data analyses, the interpretation of results,  
39  
40 472 or the decision about the publication of the results.

41  
42 473  
43  
44 474 **Data availability statement**

45  
46 475 As no new data are obtained in this systematic review, no data will be made publicly available to  
47  
48 476 third parties. Decisions on data use by third parties can only be made by the principal investigators  
49  
50 477 of the original studies, taking into account the votes of the responsible ethics committees.

51  
52  
53 478  
54  
55 479 **Disclaimer**

56  
57 480 The views of the authors do not necessarily reflect those of the German Cancer Research Center.

58  
59 481  
60

1  
2 482 **Competing interests**

3  
4 483 None declared.  
5

6 484  
7  
8 485 **Patient consent for publication**

9  
10 486 Not required.  
11

12 487  
13  
14 488 **Provenance and peer review**

15  
16 489 Not commissioned; externally peer-reviewed  
17  
18  
19

20 490 **REFERENCES**

- 21 491  
22 492 1. International Agency for Research on Cancer. Press Release No 263: Latest global cancer  
23 493 data: Cancer burden rises to 18.1 million new cases and 9.6 million cancer deaths in 2018.  
24 494 Available from: [https://www.iarc.fr/wp-content/uploads/2018/09/pr263\\_E.pdf](https://www.iarc.fr/wp-content/uploads/2018/09/pr263_E.pdf). Accessed: 9  
25 495 May 2020.  
26
- 27 496 2. Zhang L, Wang S, Che X, et al. Vitamin D and lung cancer risk: a comprehensive review  
28 497 and meta-analysis. *Cell Physiol Biochem*. 2015;36(1):299-305. doi:10.1159/000374072.  
29
- 30 498 3. Garland CF, Gorham ED. Dose-response of serum 25-hydroxyvitamin D in association with  
31 499 risk of colorectal cancer: A meta-analysis. *J Steroid Biochem Mol Biol*. 2017;168:1-8.  
32 500 doi:10.1016/j.jsbmb.2016.12.003.  
33
- 34 501 4. Li M, Chen P, Li J, et al. Review: the impacts of circulating 25-hydroxyvitamin D levels on  
35 502 cancer patient outcomes: a systematic review and meta-analysis. *J Clin Endocrinol Metab*.  
36 503 2014;99(7):2327-36. doi:10.1210/jc.2013-4320.  
37
- 38 504 5. Zhang H, Zhang H, Wen X, et al. Vitamin D Deficiency and Increased Risk of Bladder  
39 505 Carcinoma: A Meta-Analysis. *Cell Physiol Biochem*. 2015;37(5):1686-92.  
40 506 doi:10.1159/000438534.  
41
- 42 507 6. Heath AK, Kim IY, Hodge AM, et al. Vitamin D Status and Mortality: A Systematic Review  
43 508 of Observational Studies. *Int J Environ Res Public Health*. 2019;16(3):383.  
44 509 doi:10.3390/ijerph16030383.  
45
- 46 510 7. Schöttker B, Haug U, Schomburg L, et al. Strong associations of 25-hydroxyvitamin D  
47 511 concentrations with all-cause, cardiovascular, cancer, and respiratory disease mortality in a  
48 512 large cohort study. *Am J Clin Nutr*. 2013;97(4):782-93. doi:10.3945/ajcn.112.047712.  
49 513  
50
- 51 513 8. Fleet JC, DeSmet M, Johnson R, et al. Vitamin D and cancer: a review of molecular  
52 514 mechanisms. *Biochem J*. 2012;441(1):61-76. doi:10.1042/BJ20110744.  
53
- 54 515 9. Afzal S, Brøndum-Jacobsen P, Bojesen SE, et al. Genetically low vitamin D concentrations  
55 516 and increased mortality: mendelian randomisation analysis in three large cohorts. *BMJ*.  
56 517 2014;349:g6330. doi:10.1136/bmj.g6330.  
57
- 58 518 10. Rejnmark L, Bislev LS, Cashman KD, et al. Non-skeletal health effects of vitamin D  
59 519 supplementation: A systematic review on findings from meta-analyses summarizing trial  
60 520 data. *PLoS One*. 2017;12(7):e0180512. doi:10.1371/journal.pone.0180512.



- 1  
2 521 11. Bjelakovic G, Gluud LL, Nikolova D, et al. Vitamin D supplementation for prevention of  
3 522 mortality in adults. *Cochrane Database Syst Rev*. 2011(7).  
4 523 doi:10.1002/14651858.CD007470.pub2.  
5
- 6 524 12. Keum N, Lee DH, Greenwood DC, et al. Vitamin D supplementation and total cancer  
7 525 incidence and mortality: a meta-analysis of randomized controlled trials. *Ann Oncol*.  
8 526 2019;30(5):733-43. doi:10.1093/annonc/mdz059.  
9
- 10 527 13. Goulão B, Stewart F, Ford JA, et al. Cancer and vitamin D supplementation: a systematic  
11 528 review and meta-analysis. *Am J Clin Nutr*. 2018;107(4):652-63. doi:10.1093/ajcn/nqx047.  
12
- 13 529 14. Corrigendum for Goulao B et al. Cancer and vitamin D supplementation: systematic review  
14 530 and meta-analysis. *Am J Clin Nutr* 2018;107:652-63. *Am J Clin Nutr*. 2020;111(3):729-30.  
15 531 doi:10.1093/ajcn/nqz287.  
16
- 17 532 15. Zhang Y, Fang F, Tang J, et al. Association between vitamin D supplementation and  
18 533 mortality: systematic review and meta-analysis. *BMJ*. 2019;366:l4673.  
19 534 doi:10.1136/bmj.l4673.  
20
- 21 535 16. Brenner H, Jansen L, Saum K-U, et al. Vitamin D Supplementation Trials Aimed at  
22 536 Reducing Mortality Have Much Higher Power When Focusing on People with Low Serum  
23 537 25-Hydroxyvitamin D Concentrations. *J Nutr*. 2017;147(7):1325-33.  
24 538 doi:10.3945/jn.117.250191.  
25 538  
26
- 27 539 17. Maalmi H, Walter V, Jansen L, et al. Association between Blood 25-Hydroxyvitamin D  
28 540 Levels and Survival in Colorectal Cancer Patients: An Updated Systematic Review and  
29 541 Meta-Analysis. *Nutrients*. 2018;10(7):896. doi:10.3390/nu10070896.  
30
- 31 542 18. Maalmi H, Walter V, Jansen L, et al. Relationship of very low serum 25-hydroxyvitamin D3  
32 543 levels with long-term survival in a large cohort of colorectal cancer patients from Germany.  
33 544 *Eur J Epidemiol*. 2017;32(11):961-71. doi:10.1007/s10654-017-0298-z.  
34
- 35 545 19. Toriola AT, Nguyen N, Scheitler-Ring K, et al. Circulating 25-hydroxyvitamin D levels and  
36 546 prognosis among cancer patients: a systematic review. *Cancer Epidemiol Biomarkers Prev*.  
37 547 2014;23(6):917-33. doi:10.1158/1055-9965.EPI-14-0053.  
38
- 39 548 20. Heaney RP, Armas LAG. Quantifying the vitamin D economy. *Nutr Rev*. 2014;73(1):51-67.  
40 549 doi:10.1093/nutrit/nuu004.  
41
- 42 550 21. Chowdhury R, Kunutsor S, Vitezova A, et al. Vitamin D and risk of cause specific death:  
43 551 systematic review and meta-analysis of observational cohort and randomised intervention  
44 552 studies. *BMJ*. 2014;348:g1903. doi:10.1136/bmj.g1903.  
45
- 46 553 22. Moher D, Shamseer L, Clarke M, et al. Preferred reporting items for systematic review and  
47 554 meta-analysis protocols (PRISMA-P) 2015 statement. *Syst Rev*. 2015;4(1):1.  
48 555 doi:10.1186/2046-4053-4-1.  
49
- 50 556 23. Shamseer L, Moher D, Clarke M, et al. Preferred reporting items for systematic review and  
51 557 meta-analysis protocols (PRISMA-P) 2015: elaboration and explanation. *BMJ*.  
52 558 2015;349:g7647. doi:10.1136/bmj.g7647 %J BMJ : British Medical Journal.  
53 558  
54
- 55 559 24. Institute of Medicine 2011. Finding What Works in Health Care: Standards for Systematic  
56 560 Reviews. Washington, DC: The National Academies Press. doi:10.17226/13059.  
57
- 58 561 25. Higgins JPT, Thomas J, Chandler J, Cumpston M, Li T, Page MJ, Welch VA (editors).  
59 562 *Cochrane Handbook for Systematic Reviews of Interventions* version 6.1 (updated  
60 563 September 2020). Cochrane, 2020. Available from [www.training.cochrane.org/handbook](http://www.training.cochrane.org/handbook).

1

2 564

3 565

4 566

5

6 567

7 568

8 569

9

10 570

11 571

12 572

13 573

14 574

15

16 575

17 576

18 577

19 578

20 579

21

22 580

23 581

24 582

25 583

26

27 584

28 585

29 586

30

31

32

33

34

35

36

37

38

39

40

41

42

43

44

45

46

47

48

49

50

51

52

53

54

55

56

57

58

59

60

26. Moher D, Liberati A, Tetzlaff J, et al. Preferred reporting items for systematic reviews and meta-analyses: the PRISMA statement. *PLoS Med.* 2009;6(7):e1000097. doi:10.1371/journal.pmed.1000097.
27. Liberati A, Altman DG, Tetzlaff J, et al. The PRISMA statement for reporting systematic reviews and meta-analyses of studies that evaluate health care interventions: explanation and elaboration. *PLoS Med.* 2009;6(7):e1000100. doi:10.1371/journal.pmed.1000100.
28. Sterne JAC, Savović J, Page MJ, Elbers RG, Blencowe NS, Boutron I, Cates CJ, Cheng H-Y, Corbett MS, Eldridge SM, Hernán MA, Hopewell S, Hróbjartsson A, Junqueira DR, Jüni P, Kirkham JJ, Lasserson T, Li T, McAleenan A, Reeves BC, Shepperd S, Shrier I, Stewart LA, Tilling K, White IR, Whiting PF, Higgins JPT. RoB 2: a revised tool for assessing risk of bias in randomised trials. *BMJ* 2019; 366: 14898.
29. Higgins JPT, Savović J, Page MJ, Elbers RG, Sterne JAC. Chapter 8: Assessing risk of bias in a randomized trial. In: Higgins JPT, Thomas J, Chandler J, Cumpston M, Li T, Page MJ, Welch VA (editors). *Cochrane Handbook for Systematic Reviews of Interventions* version 6.1 (updated September 2020). Cochrane, 2020. Available from [www.training.cochrane.org/handbook](http://www.training.cochrane.org/handbook).
30. Krebsinformationsdienst Deutsches Krebsforschungszentrum. Krebs-Selbsthilfegruppen und Patientenverbände. Updated 06 August 2018. Available from: <https://www.krebsinformationsdienst.de/service/adressen/selbsthilfe.php#inhalt17>. Accessed: 9 May 2020.
31. BAR e.V. BAR-Verzeichnis von stationären Einrichtungen der medizinischen Rehabilitation. Available from: <https://www.bar-frankfurt.de/service/datenbanken-verzeichnisse/rehaklinikenverzeichnis/rehastuetten-suche.html>. Accessed: 9 May 2020.

1  
2 587 **Appendix 1:**  
3

4 588 Supplementary material consisting of data extraction form, risk of bias assessment, and list of  
5  
6  
7 589 individual patient data to be obtained from original researchers

8  
9 590 **Appendix 2:**  
10

11 591 Supplementary material consisting of PRISMA-P checklist  
12  
13  
14  
15  
16  
17  
18  
19  
20  
21  
22  
23  
24  
25  
26  
27  
28  
29  
30  
31  
32  
33  
34  
35  
36  
37  
38  
39  
40  
41  
42  
43  
44  
45  
46  
47  
48  
49  
50  
51  
52  
53  
54  
55  
56  
57  
58  
59  
60

For peer review only

1  
2 **Figure**

3 592  
4 593  
5 594  
6  
7 **Figure 1:** Draft of the study selection process  
8  
9  
10  
11  
12  
13  
14  
15  
16  
17  
18  
19  
20  
21  
22  
23  
24  
25  
26  
27  
28  
29  
30  
31  
32  
33  
34  
35  
36  
37  
38  
39  
40  
41  
42  
43  
44  
45  
46  
47  
48  
49  
50  
51  
52  
53  
54  
55  
56  
57  
58  
59  
60

For peer review only

1  
2  
3  
4  
5  
6  
7  
8  
9  
10  
11  
12  
13  
14  
15  
16  
17  
18  
19  
20  
21  
22  
23  
24  
25  
26  
27  
28  
29  
30  
31  
32  
33  
34  
35  
36  
37  
38  
39  
40  
41  
42  
43  
44  
45  
46  
47  
48  
49  
50  
51  
52  
53  
54  
55  
56  
57  
58  
59  
60

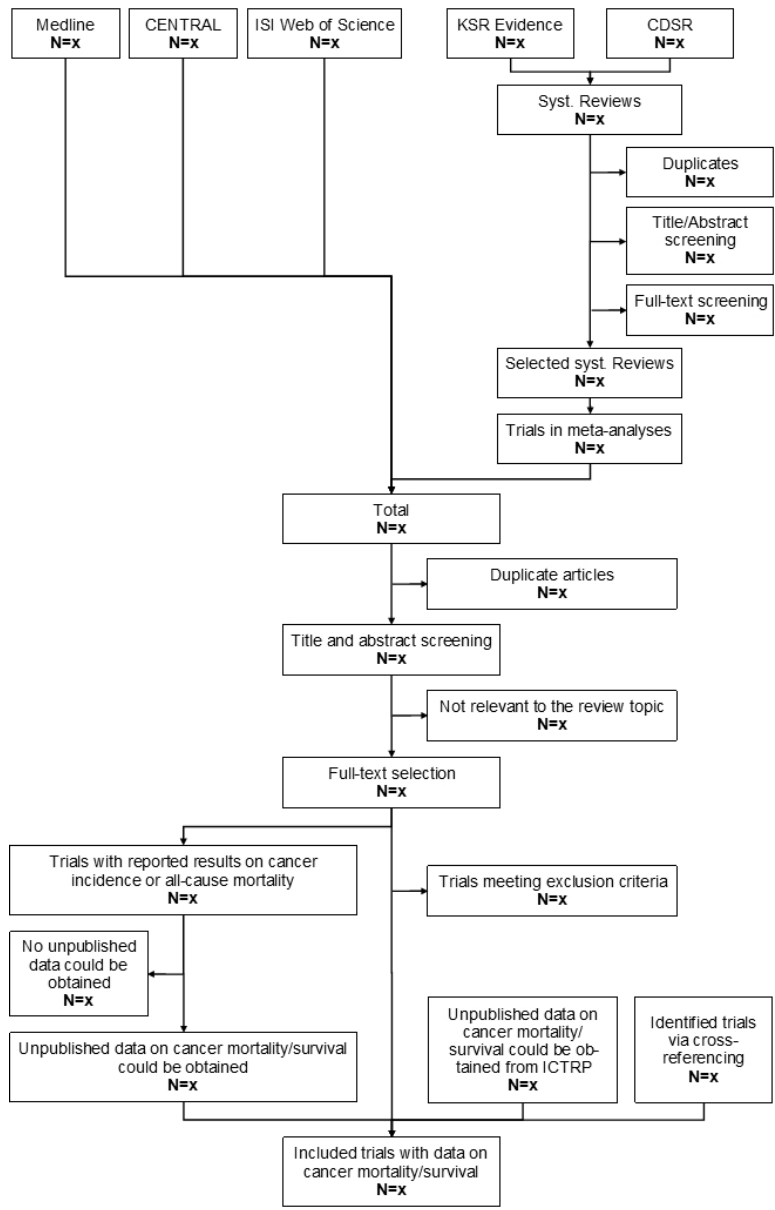

Figure 1: Draft of the study selection process

16x25mm (1000 x 1000 DPI)

| Study                                    |         |             | Population               |                         |                     |                      |                |
|------------------------------------------|---------|-------------|--------------------------|-------------------------|---------------------|----------------------|----------------|
| First author (or study name), Year (REF) | Country | Sample size | General population (y/n) | Cancer population (y/n) | Cancer site + stage | Age (mean or median) | Sex (female %) |
|                                          |         |             |                          |                         |                     |                      |                |
|                                          |         |             |                          |                         |                     |                      |                |
|                                          |         |             |                          |                         |                     |                      |                |
|                                          |         |             |                          |                         |                     |                      |                |
|                                          |         |             |                          |                         |                     |                      |                |
|                                          |         |             |                          |                         |                     |                      |                |
|                                          |         |             |                          |                         |                     |                      |                |
|                                          |         |             |                          |                         |                     |                      |                |
|                                          |         |             |                          |                         |                     |                      |                |
|                                          |         |             |                          |                         |                     |                      |                |
|                                          |         |             |                          |                         |                     |                      |                |
|                                          |         |             |                          |                         |                     |                      |                |
|                                          |         |             |                          |                         |                     |                      |                |
|                                          |         |             |                          |                         |                     |                      |                |
|                                          |         |             |                          |                         |                     |                      |                |
|                                          |         |             |                          |                         |                     |                      |                |
|                                          |         |             |                          |                         |                     |                      |                |
|                                          |         |             |                          |                         |                     |                      |                |
|                                          |         |             |                          |                         |                     |                      |                |
|                                          |         |             |                          |                         |                     |                      |                |
|                                          |         |             |                          |                         |                     |                      |                |
|                                          |         |             |                          |                         |                     |                      |                |
|                                          |         |             |                          |                         |                     |                      |                |
|                                          |         |             |                          |                         |                     |                      |                |
|                                          |         |             |                          |                         |                     |                      |                |
|                                          |         |             |                          |                         |                     |                      |                |
|                                          |         |             |                          |                         |                     |                      |                |
|                                          |         |             |                          |                         |                     |                      |                |
|                                          |         |             |                          |                         |                     |                      |                |
|                                          |         |             |                          |                         |                     |                      |                |
|                                          |         |             |                          |                         |                     |                      |                |
|                                          |         |             |                          |                         |                     |                      |                |
|                                          |         |             |                          |                         |                     |                      |                |
|                                          |         |             |                          |                         |                     |                      |                |

For peer review only

1  
2  
3  
4  
5  
6  
7  
8  
9  
10  
11  
12  
13  
14  
15  
16  
17  
18  
19  
20  
21  
22  
23  
24  
25  
26  
27  
28  
29  
30  
31  
32  
33  
34  
35  
36  
37  
38  
39  
40  
41  
42  
43  
44  
45  
46  
47  
48  
49  
50  
51  
52  
53  
54  
55  
56  
57  
58  
59  
60

|                                       |                                              |                             | Intervention                          |                                        |                                      | Comp              |
|---------------------------------------|----------------------------------------------|-----------------------------|---------------------------------------|----------------------------------------|--------------------------------------|-------------------|
| Race/ ethnicity/ skin color (white %) | BMI [kg/m <sup>2</sup> ] (n, mean or median) | 25(OH)D (n, mean or median) | Vitamin D <sub>3</sub> dosing regimen | Duration of vitamin D3 supplementation | Compliance in intervention group (%) | Placebo (y/other) |
|                                       |                                              |                             |                                       |                                        |                                      |                   |
|                                       |                                              |                             |                                       |                                        |                                      |                   |
|                                       |                                              |                             |                                       |                                        |                                      |                   |
|                                       |                                              |                             |                                       |                                        |                                      |                   |
|                                       |                                              |                             |                                       |                                        |                                      |                   |
|                                       |                                              |                             |                                       |                                        |                                      |                   |
|                                       |                                              |                             |                                       |                                        |                                      |                   |
|                                       |                                              |                             |                                       |                                        |                                      |                   |
|                                       |                                              |                             |                                       |                                        |                                      |                   |
|                                       |                                              |                             |                                       |                                        |                                      |                   |
|                                       |                                              |                             |                                       |                                        |                                      |                   |
|                                       |                                              |                             |                                       |                                        |                                      |                   |
|                                       |                                              |                             |                                       |                                        |                                      |                   |
|                                       |                                              |                             |                                       |                                        |                                      |                   |
|                                       |                                              |                             |                                       |                                        |                                      |                   |
|                                       |                                              |                             |                                       |                                        |                                      |                   |
|                                       |                                              |                             |                                       |                                        |                                      |                   |
|                                       |                                              |                             |                                       |                                        |                                      |                   |
|                                       |                                              |                             |                                       |                                        |                                      |                   |
|                                       |                                              |                             |                                       |                                        |                                      |                   |
|                                       |                                              |                             |                                       |                                        |                                      |                   |
|                                       |                                              |                             |                                       |                                        |                                      |                   |
|                                       |                                              |                             |                                       |                                        |                                      |                   |
|                                       |                                              |                             |                                       |                                        |                                      |                   |
|                                       |                                              |                             |                                       |                                        |                                      |                   |
|                                       |                                              |                             |                                       |                                        |                                      |                   |

1  
2  
3  
4  
5  
6  
7  
8  
9  
10  
11  
12  
13  
14  
15  
16  
17  
18  
19  
20  
21  
22  
23  
24  
25  
26  
27  
28  
29  
30  
31  
32  
33  
34  
35  
36  
37  
38  
39  
40  
41  
42  
43  
44  
45  
46  
47  
48  
49  
50  
51  
52  
53  
54  
55  
56  
57  
58  
59  
60

| <b>Comparator</b>                         | <b>Outcomes</b>               |                                      |                            |                                                           |                                                                |
|-------------------------------------------|-------------------------------|--------------------------------------|----------------------------|-----------------------------------------------------------|----------------------------------------------------------------|
| <b>Compliance in comparator group (%)</b> | <b>Maximum follow-up time</b> | <b>Mean or median follow-up time</b> | <b>No of cancer deaths</b> | <b>Cancer mortality in general population HR (95% CI)</b> | <b>Cancer-specific survival of cancer patients HR (95% CI)</b> |
|                                           |                               |                                      |                            |                                                           |                                                                |
|                                           |                               |                                      |                            |                                                           |                                                                |
|                                           |                               |                                      |                            |                                                           |                                                                |
|                                           |                               |                                      |                            |                                                           |                                                                |
|                                           |                               |                                      |                            |                                                           |                                                                |
|                                           |                               |                                      |                            |                                                           |                                                                |
|                                           |                               |                                      |                            |                                                           |                                                                |
|                                           |                               |                                      |                            |                                                           |                                                                |
|                                           |                               |                                      |                            |                                                           |                                                                |
|                                           |                               |                                      |                            |                                                           |                                                                |
|                                           |                               |                                      |                            |                                                           |                                                                |
|                                           |                               |                                      |                            |                                                           |                                                                |
|                                           |                               |                                      |                            |                                                           |                                                                |
|                                           |                               |                                      |                            |                                                           |                                                                |
|                                           |                               |                                      |                            |                                                           |                                                                |
|                                           |                               |                                      |                            |                                                           |                                                                |
|                                           |                               |                                      |                            |                                                           |                                                                |

For peer review only



|                                                   |                         | Comments |
|---------------------------------------------------|-------------------------|----------|
| Overall survival of cancer patients<br>HR (95%CI) | Covariates adjusted for |          |
|                                                   |                         |          |
|                                                   |                         |          |
|                                                   |                         |          |
|                                                   |                         |          |
|                                                   |                         |          |
|                                                   |                         |          |
|                                                   |                         |          |
|                                                   |                         |          |
|                                                   |                         |          |
|                                                   |                         |          |
|                                                   |                         |          |
|                                                   |                         |          |
|                                                   |                         |          |
|                                                   |                         |          |
|                                                   |                         |          |
|                                                   |                         |          |
|                                                   |                         |          |

| First author (or study name), Year (REF) | R | D | Mi | Me | S | O |
|------------------------------------------|---|---|----|----|---|---|
|                                          |   |   |    |    |   |   |
|                                          |   |   |    |    |   |   |
|                                          |   |   |    |    |   |   |
|                                          |   |   |    |    |   |   |
|                                          |   |   |    |    |   |   |
|                                          |   |   |    |    |   |   |
|                                          |   |   |    |    |   |   |
|                                          |   |   |    |    |   |   |
|                                          |   |   |    |    |   |   |
|                                          |   |   |    |    |   |   |
|                                          |   |   |    |    |   |   |
|                                          |   |   |    |    |   |   |
|                                          |   |   |    |    |   |   |
|                                          |   |   |    |    |   |   |
|                                          |   |   |    |    |   |   |
|                                          |   |   |    |    |   |   |
|                                          |   |   |    |    |   |   |
|                                          |   |   |    |    |   |   |
|                                          |   |   |    |    |   |   |
|                                          |   |   |    |    |   |   |
|                                          |   |   |    |    |   |   |
|                                          |   |   |    |    |   |   |
|                                          |   |   |    |    |   |   |
|                                          |   |   |    |    |   |   |

**Risk of bias legend**

- R** Bias arising from the randomiation
- D** Bias due to deviations from
- Mi** Bias due to missing outcome data
- Me** Bias in measurement of the
- S** Bias in selection of the reported
- O** Overall risk of bias

The following variables will be obtained for all trial participants in order to conduct the IPD meta-

| No. | Variables                                                                  |
|-----|----------------------------------------------------------------------------|
| 1   | Age                                                                        |
| 2   | Sex                                                                        |
| 3   | BMI                                                                        |
| 4   | Race/ethnicity/skin color                                                  |
| 5   | Baseline 25(OH)D levels                                                    |
| 6   | Compliance                                                                 |
| 7   | Randomisation group allocation                                             |
| 8   | Baseline date                                                              |
| 9   | Death during follow-up (y/n)                                               |
| 10  | Date of death                                                              |
| 11  | Censoring date for survivors                                               |
| 12  | Cancer death during follow-up (y/n)                                        |
| 13  | Date of cancer death                                                       |
| 14  | Censoring date for non-cancer deaths                                       |
| 15  | Cancer* diagnosis during follow-up (y/n)                                   |
| 16  | Cancer* site for each cancer during follow-up                              |
| 17  | Cancer* stage for each cancer during follow-up                             |
| 18  | Date of cancer* diagnosis for each cancer during follow-up                 |
| 19  | Cancer* diagnosis in first 5 years before baseline (y/n)                   |
| 20  | Cancer* site for each cancer in first 5 years before baseline              |
| 21  | Cancer* stage for each cancer in first 5 years before baseline             |
| 22  | Date of cancer* diagnosis for each cancer in first 5 years before baseline |

\* Excluding non-melanoma skin cancers and benign tumors

1  
2 **analysis:**  
3  
4  
5  
6  
7  
8  
9  
10  
11  
12  
13  
14  
15  
16  
17  
18  
19  
20  
21  
22  
23  
24  
25  
26  
27  
28  
29  
30  
31  
32  
33  
34  
35  
36  
37  
38  
39  
40  
41  
42  
43  
44  
45  
46  
47  
48  
49  
50  
51  
52  
53  
54  
55  
56  
57  
58  
59  
60

For peer review only

## PRISMA-P 2015 Checklist

This checklist has been adapted for use with protocol submissions to *Systematic Reviews* from Table 3 in Moher D et al: Preferred reporting items for systematic review and meta-analysis protocols (PRISMA-P) 2015 statement. *Systematic Reviews* 2015 4:1

| Section/topic                     | #  | Checklist item                                                                                                                                                                                  | Information reported                |                                     | Line number(s)          |
|-----------------------------------|----|-------------------------------------------------------------------------------------------------------------------------------------------------------------------------------------------------|-------------------------------------|-------------------------------------|-------------------------|
|                                   |    |                                                                                                                                                                                                 | Yes                                 | No                                  |                         |
| <b>ADMINISTRATIVE INFORMATION</b> |    |                                                                                                                                                                                                 |                                     |                                     |                         |
| <b>Title</b>                      |    |                                                                                                                                                                                                 |                                     |                                     |                         |
| Identification                    | 1a | Identify the report as a protocol of a systematic review                                                                                                                                        | <input checked="" type="checkbox"/> | <input type="checkbox"/>            | 1-4                     |
| Update                            | 1b | If the protocol is for an update of a previous systematic review, identify as such                                                                                                              | <input type="checkbox"/>            | <input checked="" type="checkbox"/> | n.a. (first submission) |
| <b>Registration</b>               | 2  | If registered, provide the name of the registry (e.g., PROSPERO) and registration number in the Abstract                                                                                        | <input checked="" type="checkbox"/> | <input type="checkbox"/>            | 63-64                   |
| <b>Authors</b>                    |    |                                                                                                                                                                                                 |                                     |                                     |                         |
| Contact                           | 3a | Provide name, institutional affiliation, and e-mail address of all protocol authors; provide physical mailing address of corresponding author                                                   | <input checked="" type="checkbox"/> | <input type="checkbox"/>            | 6-34                    |
| Contributions                     | 3b | Describe contributions of protocol authors and identify the guarantor of the review                                                                                                             | <input checked="" type="checkbox"/> | <input type="checkbox"/>            | 443-451                 |
| <b>Amendments</b>                 | 4  | If the protocol represents an amendment of a previously completed or published protocol, identify as such and list changes; otherwise, state plan for documenting important protocol amendments | <input checked="" type="checkbox"/> | <input type="checkbox"/>            | 370-372                 |
| <b>Support</b>                    |    |                                                                                                                                                                                                 |                                     |                                     |                         |
| Sources                           | 5a | Indicate sources of financial or other support for the review                                                                                                                                   | <input checked="" type="checkbox"/> | <input type="checkbox"/>            | 467-471                 |
| Sponsor                           | 5b | Provide name for the review funder and/or sponsor                                                                                                                                               | <input checked="" type="checkbox"/> | <input type="checkbox"/>            | 467-471                 |
| Role of sponsor/funder            | 5c | Describe roles of funder(s), sponsor(s), and/or institution(s), if any, in developing the protocol                                                                                              | <input checked="" type="checkbox"/> | <input type="checkbox"/>            | 467-471                 |
| <b>INTRODUCTION</b>               |    |                                                                                                                                                                                                 |                                     |                                     |                         |
| <b>Rationale</b>                  | 6  | Describe the rationale for the review in the context of what is already known                                                                                                                   | <input checked="" type="checkbox"/> | <input type="checkbox"/>            | 79-124                  |
| <b>Objectives</b>                 | 7  | Provide an explicit statement of the question(s) the review will address with reference to participants, interventions, comparators, and outcomes (PICO)                                        | <input checked="" type="checkbox"/> | <input type="checkbox"/>            | 126-140                 |
| <b>METHODS</b>                    |    |                                                                                                                                                                                                 |                                     |                                     |                         |

| Section/topic                             | #   | Checklist item                                                                                                                                                                                                                              | Information reported                |                                     | Line number(s)             |
|-------------------------------------------|-----|---------------------------------------------------------------------------------------------------------------------------------------------------------------------------------------------------------------------------------------------|-------------------------------------|-------------------------------------|----------------------------|
|                                           |     |                                                                                                                                                                                                                                             | Yes                                 | No                                  |                            |
| <b>Eligibility criteria</b>               | 8   | Specify the study characteristics (e.g., PICO, study design, setting, time frame) and report characteristics (e.g., years considered, language, publication status) to be used as criteria for eligibility for the review                   | <input checked="" type="checkbox"/> | <input type="checkbox"/>            | 150-190                    |
| <b>Information sources</b>                | 9   | Describe all intended information sources (e.g., electronic databases, contact with study authors, trial registers, or other grey literature sources) with planned dates of coverage                                                        | <input checked="" type="checkbox"/> | <input type="checkbox"/>            | 192-225                    |
| <b>Search strategy</b>                    | 10  | Present draft of search strategy to be used for at least one electronic database, including planned limits, such that it could be repeated                                                                                                  | <input checked="" type="checkbox"/> | <input type="checkbox"/>            | 217-218, 224-225, figure 1 |
| <b>STUDY RECORDS</b>                      |     |                                                                                                                                                                                                                                             |                                     |                                     |                            |
| Data management                           | 11a | Describe the mechanism(s) that will be used to manage records and data throughout the review                                                                                                                                                | <input checked="" type="checkbox"/> | <input type="checkbox"/>            | 227-262                    |
| Selection process                         | 11b | State the process that will be used for selecting studies (e.g., two independent reviewers) through each phase of the review (i.e., screening, eligibility, and inclusion in meta-analysis)                                                 | <input checked="" type="checkbox"/> | <input type="checkbox"/>            | 227-262                    |
| Data collection process                   | 11c | Describe planned method of extracting data from reports (e.g., piloting forms, done independently, in duplicate), any processes for obtaining and confirming data from investigators                                                        | <input checked="" type="checkbox"/> | <input type="checkbox"/>            | 227-262, appendix 1        |
| <b>Data items</b>                         | 12  | List and define all variables for which data will be sought (e.g., PICO items, funding sources), any pre-planned data assumptions and simplifications                                                                                       | <input checked="" type="checkbox"/> | <input type="checkbox"/>            | 361-363, appendix 1        |
| <b>Outcomes and prioritization</b>        | 13  | List and define all outcomes for which data will be sought, including prioritization of main and additional outcomes, with rationale                                                                                                        | <input checked="" type="checkbox"/> | <input type="checkbox"/>            | 131-133, 168-172, table 2  |
| <b>Risk of bias in individual studies</b> | 14  | Describe anticipated methods for assessing risk of bias of individual studies, including whether this will be done at the outcome or study level, or both; state how this information will be used in data synthesis                        | <input checked="" type="checkbox"/> | <input type="checkbox"/>            | 264-282, 347-360           |
| <b>DATA</b>                               |     |                                                                                                                                                                                                                                             |                                     |                                     |                            |
| <b>Synthesis</b>                          | 15a | Describe criteria under which study data will be quantitatively synthesized                                                                                                                                                                 | <input checked="" type="checkbox"/> | <input type="checkbox"/>            | 290-297                    |
|                                           | 15b | If data are appropriate for quantitative synthesis, describe planned summary measures, methods of handling data, and methods of combining data from studies, including any planned exploration of consistency (e.g., $I^2$ , Kendall's tau) | <input checked="" type="checkbox"/> | <input type="checkbox"/>            | 297-325, 345-358           |
|                                           | 15c | Describe any proposed additional analyses (e.g., sensitivity or subgroup analyses, meta-regression)                                                                                                                                         | <input checked="" type="checkbox"/> | <input type="checkbox"/>            | 326-344, 351-358           |
|                                           | 15d | If quantitative synthesis is not appropriate, describe the type of summary planned                                                                                                                                                          | <input type="checkbox"/>            | <input checked="" type="checkbox"/> | n.a. (quantitative)        |

1  
2  
3  
4  
5  
6  
7  
8  
9  
10  
11  
12  
13  
14  
15  
16  
17  
18  
19  
20  
21  
22  
23  
24  
25  
26  
27  
28  
29  
30  
31  
32  
33  
34  
35  
36  
37  
38  
39  
40  
41  
42  
43  
44  
45  
46

| Section/topic                            | #  | Checklist item                                                                                                              | Information reported                |                          | Line number(s)               |
|------------------------------------------|----|-----------------------------------------------------------------------------------------------------------------------------|-------------------------------------|--------------------------|------------------------------|
|                                          |    |                                                                                                                             | Yes                                 | No                       |                              |
|                                          |    |                                                                                                                             |                                     |                          | synthesis will be performed) |
| <b>Meta-bias(es)</b>                     | 16 | Specify any planned assessment of meta-bias(es) (e.g., publication bias across studies, selective reporting within studies) | <input checked="" type="checkbox"/> | <input type="checkbox"/> | 359-360                      |
| <b>Confidence in cumulative evidence</b> | 17 | Describe how the strength of the body of evidence will be assessed (e.g., GRADE)                                            | <input checked="" type="checkbox"/> | <input type="checkbox"/> | 364-369                      |

For peer review only
