# Supplementary material for: Efficacy of vitamin D3 supplementation on cancer mortality in the general population and the prognosis of patients with cancer: protocol of a systematic review and individual patient data meta-analysis of randomised controlled trials
Source: PubMed Central journal article supplement — BMJ Open. 2021 Jan 13;11(1):e041607. doi: 10.1136/bmjopen-2020-041607 (PMC7812083; doi:10.1136/bmjopen-2020-041607), 2021-01-13
Supplement: bmjopen-2020-041607supp003.pdf [file bmjopen-2020-041607supp003.pdf]

**LOG FOR PROTOCOL AMENDMENTS**

**Efficacy of vitamin D<sub>3</sub> supplementation on cancer mortality in the general population and the prognosis of patients with cancer: protocol of a systematic review and individual patient data meta-analysis of randomised controlled trials (DOI: 10.1136/bmjopen-2020-041607)**

| <b>Date</b><br>(DD/MM/YYYY) | <b>Description of the change</b> | <b>Rationale</b> | <b>Made by</b> |
|-----------------------------|----------------------------------|------------------|----------------|
|                             |                                  |                  |                |
|                             |                                  |                  |                |
|                             |                                  |                  |                |
